# Supplementary material for: Synthesis of Combretastatin A-4 and 3′-Aminocombretastatin A-4 derivatives with Aminoacid Containing Pendants and Study of their Interaction with Tubulin and as Downregulators of the VEGF, hTERT and c-Myc Gene Expression
Source: PubMed Central journal article supplement (PMC7037732; doi:10.3390/molecules25030660), 2020-02-04

# Synthesis of combretastatin A-4 and 3'-aminocombretastatin A-4 derivatives with aminoacid containing pendants and study of their interaction with tubulin and as downregulators of the *VEGF*, *hTERT* and *c-Myc* gene expressions

Raül Agut<sup>1</sup>, Eva Falomir<sup>1\*</sup>, Juan Murga<sup>1</sup>, Celia Martín-Beltrán<sup>1</sup>, Raquel Gil-Edo<sup>1</sup>, Alberto Pla<sup>1</sup>, Miguel Carda<sup>1\*</sup>, and J. Alberto Marco<sup>2</sup>

<sup>1</sup>Departamento de Química Inorgánica y Orgánica, Universidad Jaume I, E-12071 Castellón, Spain.

<sup>2</sup>Departamento de Química Orgánica, Universidad de Valencia, E-46100 Burjassot, Valencia, Spain.

## *Supporting Information*

### *Contents:*

*S-2: Cell cycle histograms*

*S-3: Analytical data*

*S-18: Graphical NMR spectra*

## *Cell cycle histograms*

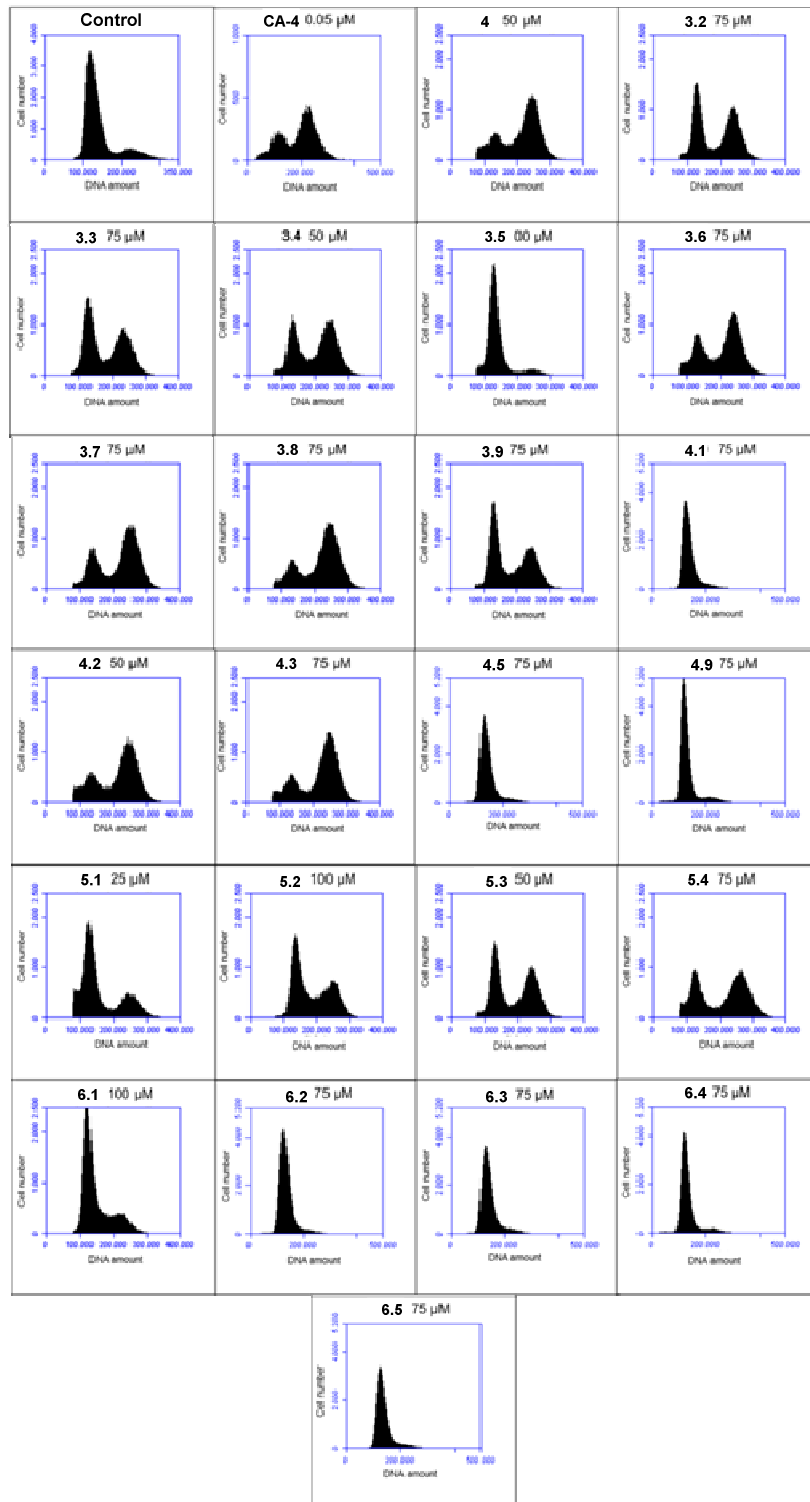

**Figure 11.** Cell cycle histograms for CA-4 and selected derivatives.

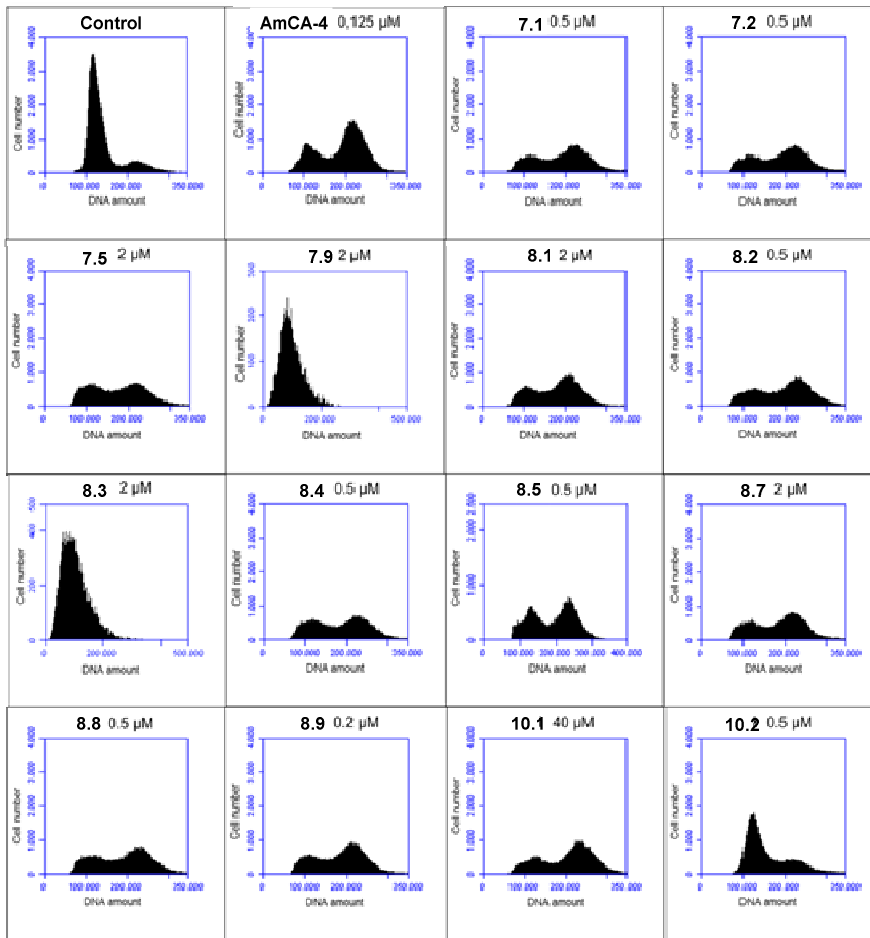

**Figure 12.** Cell cycle histograms for AmCA-4 and selected derivatives.

## Analytical data of synthetic compounds

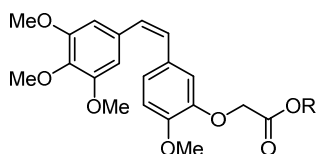

- 1 R=Et  
2 R=H

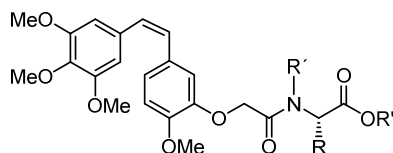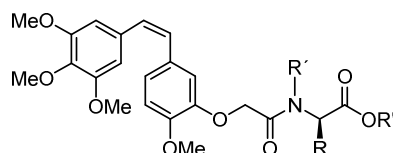

- 3.1 R=R'=H, R''=Me  
3.2 R=CH(CH<sub>3</sub>)<sub>2</sub>, R'=H, R''=Me  
3.3 R=CH<sub>2</sub>CH(CH<sub>3</sub>)<sub>2</sub>, R'=H, R''=Me  
3.4 R=CH<sub>2</sub>C<sub>6</sub>H<sub>5</sub>, R'=H, R''=Me  
3.5 R=R'=(CH<sub>2</sub>)<sub>3</sub>, R''=Me  
3.6 R=CH<sub>2</sub>(OH), R'=H, R''=Me  
3.7 R=CH(OH)CH<sub>3</sub>, R'=H, R''=Me  
3.8 R=CH<sub>2</sub>p-C<sub>6</sub>H<sub>4</sub>-OH, R'=H, R''=Me  
3.9 R=(CH<sub>2</sub>)<sub>2</sub>SCH<sub>3</sub>, R'=H, R''=Me  
4.1 R=R'=R''=H (71%)  
4.2 R=CH(CH<sub>3</sub>)<sub>2</sub>, R'=R''=H  
4.3 R=CH<sub>2</sub>CH(CH<sub>3</sub>)<sub>2</sub>, R'=R''=H  
4.4 R=CH<sub>2</sub>C<sub>6</sub>H<sub>5</sub>, R'=R''=H  
4.5 R=R'=(CH<sub>2</sub>)<sub>3</sub>, R''=H  
4.6 R=CH<sub>2</sub>(OH), R'=R''=H  
4.7 R=CH(OH)CH<sub>3</sub>, R'=R''=H  
4.8 R=CH<sub>2</sub>p-C<sub>6</sub>H<sub>4</sub>-OH, R'=R''=H  
4.9 R=(CH<sub>2</sub>)<sub>2</sub>SCH<sub>3</sub>, R'=R''=H

- 5.1 R=CH(CH<sub>3</sub>)<sub>2</sub>, R'=H, R''=Me  
5.2 R=CH<sub>2</sub>CH(CH<sub>3</sub>)<sub>2</sub>, R'=H, R''=Me  
5.3 R=CH<sub>2</sub>C<sub>6</sub>H<sub>5</sub>, R'=H, R''=Me  
5.4 R=R'=(CH<sub>2</sub>)<sub>3</sub>, R''=Me  
5.5 R=CH<sub>2</sub>(OH), R'=H, R''=Me  
6.1 R=CH(CH<sub>3</sub>)<sub>2</sub>, R'=R''=H  
6.2 R=CH<sub>2</sub>CH(CH<sub>3</sub>)<sub>2</sub>, R'=R''=H  
6.3 R=CH<sub>2</sub>C<sub>6</sub>H<sub>5</sub>, R'=R''=H  
6.4 R=R'=(CH<sub>2</sub>)<sub>3</sub>, R''=H  
6.5 R=CH<sub>2</sub>(OH), R'=R''=H

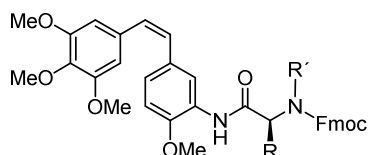

- 7.1 R=R'=H  
7.2 R=CH<sub>3</sub>, R'=H  
7.3 R=CH(CH<sub>3</sub>)<sub>2</sub>, R'=H  
7.4 R=CH<sub>2</sub>CH(CH<sub>3</sub>)<sub>2</sub>, R'=H  
7.5 R=CH<sub>2</sub>C<sub>6</sub>H<sub>5</sub>, R'=H  
7.6 R=R'=(CH<sub>2</sub>)<sub>3</sub>  
7.7 R=CH(OH)CH<sub>3</sub>, R'=H  
7.8 R=CH<sub>2</sub>p-C<sub>6</sub>H<sub>4</sub>-OH, R'=H  
7.9 R=(CH<sub>2</sub>)<sub>2</sub>SCH<sub>3</sub>, R'=H

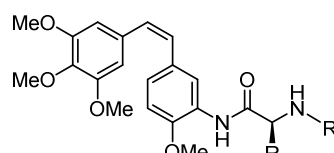

- 8.1 R=R'=H  
8.2 R=CH<sub>3</sub>, R'=H  
8.3 R=CH(CH<sub>3</sub>)<sub>2</sub>, R'=H  
8.4 R=CH<sub>2</sub>CH(CH<sub>3</sub>)<sub>2</sub>, R'=H  
8.5 R=CH<sub>2</sub>C<sub>6</sub>H<sub>5</sub>, R'=H  
8.6 R=R'=(CH<sub>2</sub>)<sub>3</sub>  
8.7 R=CH(OH)CH<sub>3</sub>, R'=H  
8.8 R=CH<sub>2</sub>p-C<sub>6</sub>H<sub>4</sub>-OH, R'=H  
8.9 R=(CH<sub>2</sub>)<sub>2</sub>SCH<sub>3</sub>, R'=H

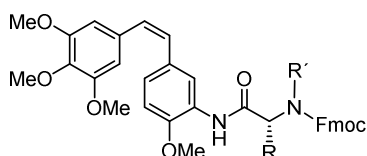

- 9.1 R=CH(CH<sub>3</sub>)<sub>2</sub>, R'=H  
9.2 R=CH<sub>2</sub>CH(CH<sub>3</sub>)<sub>2</sub>, R'=H  
9.3 R=CH<sub>2</sub>C<sub>6</sub>H<sub>5</sub>, R'=H  
9.4 R=R'=(CH<sub>2</sub>)<sub>3</sub>

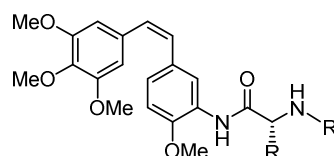

- 10.1 R=CH(CH<sub>3</sub>)<sub>2</sub>, R'=H  
10.2 R=CH<sub>2</sub>CH(CH<sub>3</sub>)<sub>2</sub>, R'=H  
10.3 R=CH<sub>2</sub>C<sub>6</sub>H<sub>5</sub>, R'=H  
10.4 R=R'=(CH<sub>2</sub>)<sub>3</sub>

Signal assignments in the NMR spectra of molecules **1-2**, **3.1-3.9**, **4.1-4.9**, **5.1-5.5** and **6.1-6.5** having the general structures indicated below are based on the following, non-systematic numbering system:

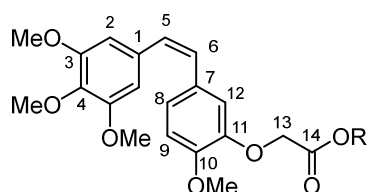

**1-2**

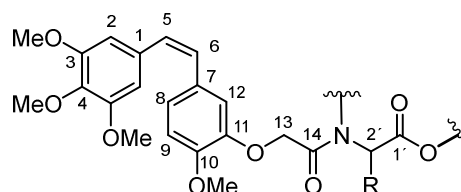

**3.1-3.9, 4.1-4.9, 5.1-5.5 and 6.1-6.5**

**Ethyl (Z)-2-(2-methoxy-5-(3,4,5-trimethoxystyryl)phenoxy)acetate (1):** yield, 94%, off-white solid m. p. 70-72 °C; IR:  $\nu_{\max}$  1755  $\text{cm}^{-1}$  (br, C=O);  $^1\text{H}$  NMR (500 MHz,  $\text{CDCl}_3$ )  $\delta$  6.90 (1H, dd,  $J = 8.3, 2$  Hz; H-8), 6.78 (1H, d,  $J = 8.3$  Hz; H-9), 6.74 (1H, d,  $J = 2$  Hz; H-12), 6.47 (2H, s; H-2), 6.46 (1H, d,  $J = 12.2$  Hz; H-5), 6.42 (1H, d,  $J = 12.2$  Hz; H-6), 4.48 (2H, s; H-13), 4.18 (2H, q,  $J = 7.3$  Hz; ethyl ester  $\text{CH}_2$ ), 3.84 (3H, s; OMe), 3.82 (3H, s; OMe), 3.69 (6H, s; 2 OMe), 1.23 (3H, t,  $J = 7.3$  Hz; ethyl ester  $\text{CH}_3$ );  $^{13}\text{C}$  NMR (125 MHz,  $\text{CDCl}_3$ )  $\delta$  168.5 (C-14), 152.9 (x 2, C-3), 148.7 (C-11), 146.8 (C-10), 137.1 (C-4), 132.6 (C-1), 129.8 (C-7); 129.3, 129.1 (C-5, C-6), 123.2 (C-8), 114.6 (C-9), 111.6 (C-12), 106.0 (x 2, C-2); 66.1 (C-13), 61.1 (ethyl ester  $\text{CH}_2$ ); 60.7 (OMe), 55.9 (OMe), 55.8 (2 x OMe), 14.0 (ethyl ester  $\text{CH}_3$ ); HR ESMS  $m/z$  425.1576 ( $\text{M}+\text{Na}$ ) $^+$ . Calc. for  $\text{C}_{22}\text{H}_{26}\text{NaO}_7$ , 425.1576.

**(Z)-2-(2-Methoxy-5-(3,4,5-trimethoxystyryl)phenoxy)acetic acid (2):** yield, 91%, off-white solid m. p. 109-111 °C; IR:  $\nu_{\max}$  3500-3200 (br, OH), 1742 (br, C=O)  $\text{cm}^{-1}$ ;  $^1\text{H}$  NMR (500 MHz,  $\text{CDCl}_3$ )  $\delta$  8.10 (1H, br s, OH), 6.93 (1H, dd,  $J = 8.3, 2$  Hz; H-8), 6.79 (1H, d,  $J = 8.3$  Hz; H-9), 6.78 (1H, d,  $J = 2$  Hz; H-12), 6.47 (2H, s; H-2), 6.45 (2H, s; H-5, H-6), 4.52 (2H, s; H-13), 3.85 (3H, s; OMe), 3.83 (3H, s; OMe), 3.69 (6H, s; 2 x OMe);  $^{13}\text{C}$  NMR (125 MHz,  $\text{CDCl}_3$ )  $\delta$  172.0 (C-14), 152.9 (x 2, C-3), 148.7 (C-11), 146.6 (C-10), 137.1 (C-4), 132.7 (C-1), 130.0 (C-7); 129.2, 129.1 (C-5, C-6), 123.8 (C-8), 115.2 (C-9), 111.7 (C-12), 106.0 (x 2, C-2); 66.3 (C-13); 60.8 (OMe), 55.9 (2 x OMe), 55.8 (OMe); HR ESMS  $m/z$  373.1284 ( $\text{M}-\text{H}$ ) $^-$ . Calc. for  $\text{C}_{20}\text{H}_{21}\text{O}_7$ , 373.1287.

**Methyl (Z)-2-(2-methoxy-5-(3,4,5-trimethoxystyryl)phenoxy)acetyl)glycinate (3.1):** yield, 68% off-white solid m. p. 103-105 °C; IR:  $\nu_{\max}$  3400 (br, NH), 1751, 1683 (C=O)  $\text{cm}^{-1}$ ;  $^1\text{H}$  NMR (500 MHz,  $\text{CDCl}_3$ )  $\delta$  7.45 (1H, br s, NH), 6.96 (1H, dd,  $J = 8.3, 2$  Hz; H-8), 6.85 (1H, d,  $J = 2$  Hz; H-12), 6.80 (1H, d,  $J = 8.3$  Hz; H-9), 6.48 (2H, s; H-5, H-6), 6.46 (2H, s; H-2), 4.43 (2H, s; H-13), 4.11 (2H, d,  $J = 6$  Hz; H-2'), 3.87 (3H, s; OMe), 3.84 (3H, s; OMe), 3.76 (3H, s; OMe), 3.69 (6H, s; 2 x OMe);  $^{13}\text{C}$  NMR (125 MHz,  $\text{CDCl}_3$ )  $\delta$  169.7, 168.7 (C-14, C-1'), 153.0 (x 2, C-3), 148.9 (C-11), 146.7 (C-10), 137.4 (C-4), 132.5 (C-1), 130.3 (C-7); 129.5, 128.9 (C-5, C-6), 124.0 (C-8), 116.5 (C-9), 111.7 (C-12), 106.0 (x 2, C-2); 69.4 (C-13), 40.7 (C-2'); 60.9 (OMe), 55.9 (2 x OMe), 55.8 (OMe), 52.3 (OMe); HR ESMS  $m/z$  468.1634 ( $\text{M}+\text{Na}$ ) $^+$ . Calc. for  $\text{C}_{23}\text{H}_{27}\text{NNaO}_8$ , 468.1634.

**Methyl (Z)-2-(2-methoxy-5-(3,4,5-trimethoxystyryl)phenoxy)acetyl)-L-valinate (3.2):** yield, 72%, yellowish oil;  $[\alpha]_{\text{D}} +11.8$  ( $c$  1.1,  $\text{CHCl}_3$ ); IR:  $\nu_{\max}$  3350 (br, NH), 1742, 1686 (C=O)  $\text{cm}^{-1}$ ;  $^1\text{H}$  NMR (500 MHz,  $\text{CDCl}_3$ )  $\delta$  7.50 (1H, br d,  $J \sim 9$  Hz, NH), 6.98 (1H, dd,  $J = 8.3, 2$  Hz; H-8), 6.87 (1H, d,  $J = 2$  Hz; H-12), 6.80 (1H, d,  $J = 8.3$  Hz; H-9), 6.49 (2H, s; H-2), 6.47 (2H, app s; H-5, H-6), 4.59 (1H, dd,  $J = 9, 5$  Hz; H-2'), 4.46 (1H, d,  $J = 15$  Hz; H-13a), 4.43 (1H, d,  $J = 15$  Hz; H-13b), 3.87 (3H, s; OMe), 3.85

(3H, s; OMe), 3.73 (3H, s; OMe), 3.70 (6H, s; 2 x OMe), 2.20 (1H, m; valine isopropyl CH), 0.94 (3H, d,  $J = 7$  Hz; valine isopropyl Me), 0.91 (3H, d,  $J = 7$  Hz; valine isopropyl Me);  $^{13}\text{C}$  NMR (125 MHz,  $\text{CDCl}_3$ )  $\delta$  171.8, 168.5 (C-14, C-1'), 153.0 (x 2, C-3), 149.0 (C-11), 146.9 (C-10), 137.4 (C-4), 132.5 (C-1), 130.4 (C-7); 129.5, 128.9 (C-5, C-6), 124.0 (C-8), 116.8 (C-9), 111.6 (C-12), 106.0 (x 2, C-2), 56.6 (C-2'), 31.2 (valine isopropyl CH); 69.8 (C-13); 60.9 (OMe), 55.9 (2 x OMe), 55.8 (OMe), 52.0 (OMe), 18.8, 17.6 (valine isopropyl Me); HR ESMS  $m/z$  510.2099 ( $\text{M}+\text{Na}$ )<sup>+</sup>. Calc. for  $\text{C}_{26}\text{H}_{33}\text{NNaO}_8$ , 510.2104.

**Methyl (Z)-(2-(2-methoxy-5-(3,4,5-trimethoxystyryl)phenoxy)acetyl)-L-leucinate (3.3):** yield, 79%, off-white solid m. p. 85-87 °C;  $[\alpha]_{\text{D}} +1.7$  ( $c$  1.2,  $\text{CHCl}_3$ ); IR:  $\nu_{\text{max}}$  3350 (br, NH), 1744, 1684 (C=O)  $\text{cm}^{-1}$ ;  $^1\text{H}$  NMR (500 MHz,  $\text{CDCl}_3$ )  $\delta$  7.40 (1H, br d,  $J \sim 8.5$  Hz, NH), 6.98 (1H, dd,  $J = 8.3, 2$  Hz; H-8), 6.86 (1H, d,  $J = 2$  Hz; H-12), 6.80 (1H, d,  $J = 8.3$  Hz; H-9), 6.49 (2H, s; H-2), 6.47 (2H, app s; H-5, H-6), 4.68 (1H, m; H-2'), 4.43 (1H, d,  $J = 15$  Hz; H-13a), 4.41 (1H, d,  $J = 15$  Hz; H-13b), 3.87 (3H, s; OMe), 3.85 (3H, s; OMe), 3.73 (3H, s; OMe), 3.70 (6H, s; 2 x OMe), 1.75-1.55 (3H, br m; leucine  $\text{CHCH}_2$ ), 0.94 (3H, d,  $J = 7$  Hz; leucine isopropyl Me), 0.93 (3H, d,  $J = 7$  Hz; leucine isopropyl Me);  $^{13}\text{C}$  NMR (125 MHz,  $\text{CDCl}_3$ )  $\delta$  172.8, 168.4 (C-14, C-1'), 153.0 (x 2, C-3), 149.0 (C-11), 146.9 (C-10), 137.4 (C-4), 132.5 (C-1), 130.4 (C-7); 129.6, 128.9 (C-5, C-6), 124.0 (C-8), 117.0 (C-9), 111.6 (C-12), 106.0 (x 2, C-2), 50.3 (C-2'), 24.8 (leucine isopropyl CH); 69.8 (C-13), 41.5 (leucine  $\text{CH}_2$ ); 60.9 (OMe), 55.9 (2 x OMe), 55.8 (OMe), 52.2 (OMe), 22.8, 21.8 (leucine isopropyl Me); HR ESMS  $m/z$  524.2250 ( $\text{M}+\text{Na}$ )<sup>+</sup>. Calc. for  $\text{C}_{27}\text{H}_{35}\text{NNaO}_8$ , 524.2260.

**Methyl (Z)-(2-(2-methoxy-5-(3,4,5-trimethoxystyryl)phenoxy)acetyl)-L-phenylalaninate (3.4):** yield, 80%, yellowish oil;  $[\alpha]_{\text{D}} +24.7$  ( $c$  1.0,  $\text{CHCl}_3$ ); IR:  $\nu_{\text{max}}$  3400, 3340 (br, NH), 1745, 1682 (C=O)  $\text{cm}^{-1}$ ;  $^1\text{H}$  NMR (500 MHz,  $\text{CDCl}_3$ )  $\delta$  7.55 (1H, br d,  $J \sim 8$  Hz, NH), 7.25-7.20 (3H, m; phenylalanine aromatic protons), 7.08 (2H, m; phenylalanine aromatic protons), 6.98 (1H, dd,  $J = 8.3, 2$  Hz; H-8), 6.83 (1H, d,  $J = 2$  Hz; H-12), 6.77 (1H, d,  $J = 8.3$  Hz; H-9), 6.49 (2H, s; H-2), 6.47 (2H, degenerate AB system,  $J \sim 12$  Hz; H-5, H-6), 4.94 (1H, dt,  $J = 8, 6.5$  Hz; H-2'), 4.42 (1H, d,  $J = 15$  Hz; H-13a), 4.38 (1H, d,  $J = 15$  Hz; H-13b), 3.85 (3H, s; OMe), 3.73 (3H, s; OMe), 3.71 (3H, s; OMe), 3.69 (6H, s; 2 x OMe), 3.12 (2H, m; phenylalanine  $\text{CH}_2$ );  $^{13}\text{C}$  NMR (125 MHz,  $\text{CDCl}_3$ )  $\delta$  171.4, 168.3 (C-14, C-1'), 153.0 (x 2, C-3), 149.1 (C-11), 146.9 (C-10), 137.4 (C-4), 135.8 (phenylalanine aromatic), 132.6 (C-1), 130.3 (C-7); 129.5 (C-5 or C-6), 129.2 (x 2, phenylalanine aromatic), 128.9 (C-6 or C-5), 128.5 (x 2, phenylalanine aromatic), 127.0 (phenylalanine aromatic), 124.1 (C-8), 116.9 (C-9), 111.7 (C-12), 106.0 (x 2, C-2), 52.8 (C-2'); 69.8 (C-13), 38.1 (phenylalanine  $\text{CH}_2$ ); 60.9 (OMe), 56.0 (2 x OMe), 55.7 (OMe), 52.2 (OMe); HR ESMS  $m/z$  558.2100 ( $\text{M}+\text{Na}$ )<sup>+</sup>. Calc. for  $\text{C}_{30}\text{H}_{33}\text{NNaO}_8$ , 558.2104.

**Methyl (Z)-(2-(2-methoxy-5-(3,4,5-trimethoxystyryl)phenoxy)acetyl)-L-prolinate (3.5):** yield, 74%, yellowish oil;  $[\alpha]_{\text{D}} -41.9$  ( $c$  1.1,  $\text{CHCl}_3$ ); IR:  $\nu_{\text{max}}$  1742, 1671 (C=O)  $\text{cm}^{-1}$ ;  $^1\text{H}$  NMR (500 MHz,  $\text{CDCl}_3$ )  $\delta$  6.90 (1H, dd,  $J = 8.3, 2$  Hz; H-8), 6.80 (1H, d,  $J = 2$  Hz; H-12), 6.76 (1H, d,  $J = 8.3$  Hz; H-9), 6.50 (2H, s; H-2), 6.48 (1H, d,  $J = 12$  Hz; H-5 or H-6), 6.43 (1H, d,  $J = 12$  Hz; H-6 or H-5), 4.52 (2H, s; H-13), 4.49 (1H, m; H-2'), 3.83 (3H, s; OMe), 3.82 (3H, s; OMe), 3.71 (6H, s; 2 x OMe), 3.68 (3H, s; OMe), 3.60-3.50 (2H, m; proline  $\text{CH}_2\text{N}$ ), 2.20-1.90 (4H, br m; proline 2 x  $\text{CH}_2$ );  $^{13}\text{C}$  NMR (125 MHz,  $\text{CDCl}_3$ )  $\delta$  172.3, 166.4 (C-14, C-1'), 152.9 (x 2, C-3), 148.7 (C-11), 147.0 (C-10), 137.1 (C-4), 132.9 (C-1), 129.8 (C-7); 129.5, 128.8 (C-5, C-6), 123.1 (C-8), 114.7 (C-9), 111.6 (C-12), 106.0 (x 2, C-2), 59.1 (C-2'); 67.9 (C-13), 46.1, 28.6, 24.9 (proline 3 x  $\text{CH}_2$ ); 60.8 (OMe), 55.9 (2 x OMe), 55.8 (OMe), 52.1 (OMe); HR ESMS  $m/z$  508.1945 ( $\text{M}+\text{Na}$ )<sup>+</sup>. Calc. for  $\text{C}_{26}\text{H}_{31}\text{NNaO}_8$ , 508.1947.

**Methyl (Z)-(2-(2-methoxy-5-(3,4,5-trimethoxystyryl)phenoxy)acetyl)-L-serinate (3.6):** yield, 97%, off-white solid, m. p. 65-67 °C;  $[\alpha]_D +14.4$  (*c* 1.0, CHCl<sub>3</sub>); IR:  $\nu_{\max}$  3500-3300 (br, OH, NH), 1748, 1676 (C=O) cm<sup>-1</sup>; <sup>1</sup>H NMR (500 MHz, CDCl<sub>3</sub>)  $\delta$  7.90 (1H, br d, *J* ~ 7.5 Hz, NH), 6.96 (1H, dd, *J* = 8.3, 2 Hz, H-8), 6.86 (1H, d, *J* = 2 Hz; H-12), 6.80 (1H, d, *J* = 8.3 Hz, H-9), 6.48 (2H, s; H-2), 6.46 (2H, app s; H-5, H-6), 4.71 (1H, m, H-2'), 4.43 (2H, s; H-13), 4.00 (1H, dd, *J* = 11.2, 4 Hz; serine CH<sub>2</sub>), 3.91 (1H, dd, *J* = 11.2, 3.5 Hz; serine CH<sub>2</sub>), 3.86 (3H, s; OMe), 3.84 (3H, s; OMe), 3.79 (3H, s; OMe), 3.70 (6H, s; 2 x OMe), 2.70 (1H, br s, OH); <sup>13</sup>C NMR (125 MHz, CDCl<sub>3</sub>)  $\delta$  170.4, 169.0 (C-14, C-1'), 153.0 (x 2, C-3), 149.1 (C-11), 146.9 (C-10), 137.3 (C-4), 132.6 (C-1), 130.4 (C-7); 129.6, 128.9 (C-5, C-6), 124.2 (C-8), 117.0 (C-9), 111.8 (C-12), 106.0 (x 2, C-2), 54.3 (C-2'), 69.8 (C-13), 63.2 (serine CH<sub>2</sub>); 60.9 (OMe), 55.9 (3 x OMe), 52.6 (OMe); HR ESMS *m/z* 498.1743 (M+Na)<sup>+</sup>. Calc. for C<sub>24</sub>H<sub>29</sub>NNaO<sub>9</sub>, 498.1740.

**Methyl (2-(2-methoxy-5-((Z)-3,4,5-trimethoxystyryl)phenoxy)acetyl)-L-threoninate (3.7):** yield, 70%, yellowish oil;  $[\alpha]_D +2.2$  (*c* 1.0, CHCl<sub>3</sub>); IR:  $\nu_{\max}$  3500-3300 (br, OH, NH), 1748, 1671 (C=O) cm<sup>-1</sup>; <sup>1</sup>H NMR (500 MHz, CDCl<sub>3</sub>)  $\delta$  7.75 (1H, br d, *J* ~ 9 Hz, NH), 6.98 (1H, dd, *J* = 8.3, 2 Hz; H-8), 6.89 (1H, d, *J* = 2 Hz; H-12), 6.80 (1H, d, *J* = 8.3 Hz; H-9), 6.49 (2H, s; H-2), 6.46 (2H, app s; H-5, H-6), 4.64 (1H, dd, *J* = 9, 2.5 Hz; H-2'), 4.49 (2H, s; H-13), 4.37 (1H, br qd, *J* ~ 6.5, 2.5 Hz; threonine  $\beta$ -H), 3.86 (3H, s; OMe), 3.84 (3H, s; OMe), 3.75 (3H, s; OMe), 3.70 (6H, s; 2 x OMe), 2.30 (1H, br s, OH), 1.18 (3H, d, *J* = 6.5 Hz; threonine Me); <sup>13</sup>C NMR (125 MHz, CDCl<sub>3</sub>)  $\delta$  170.9, 169.3 (C-14, C-1'), 153.0 (x 2; C-3), 149.2 (C-11), 147.1 (C-10), 137.3 (C-4), 132.6 (C-1), 130.4 (C-7), 129.6, 128.9 (C-5, C-6), 124.2 (C-8), 117.3 (C-9), 111.8 (C-12) 106.0 (x 2, C-2), 67.9 (C-2'), 56.8 (threonine  $\beta$ -C), 70.1 (C-13); 60.9 (OMe), 56.0 (3 x OMe), 52.5 (OMe), 19.8\* (threonine Me) (the signal marked with \* appears low and broad); HR ESMS *m/z* 512.1895 (M+Na)<sup>+</sup>. Calc. for C<sub>25</sub>H<sub>31</sub>NNaO<sub>9</sub>, 512.1897.

**Methyl (Z)-(2-(2-methoxy-5-(3,4,5-trimethoxystyryl)phenoxy)acetyl)-L-tyrosinate (3.8):** yield, 84%, yellowish oil;  $[\alpha]_D +40.0$  (*c* 1.0, CHCl<sub>3</sub>); IR:  $\nu_{\max}$  3400, 3340 (br, OH, NH), 1746, 1666 (C=O) cm<sup>-1</sup>; <sup>1</sup>H NMR (500 MHz, CDCl<sub>3</sub>)  $\delta$  7.45 (1H, br d, *J* ~ 8 Hz, NH), 6.98 (1H, dd, *J* = 8.3, 2 Hz; H-8), 6.90 (2H, app d, *J* = 8.3 Hz; tyrosine aromatic protons), 6.86 (1H, d, *J* = 2 Hz; H-12), 6.79 (1H, d, *J* = 8.3 Hz; H-9), 6.65 (2H, app d, *J* = 8.3 Hz; tyrosine aromatic protons), 6.50 (2H, s; H-2), 6.47 (2H, app s; H-5, H-6), 5.80 (1H, br s, OH), 4.90 (1H, dt, *J* = 8, 6 Hz; H-2'), 4.43 (1H, d, *J* = 15 Hz; H-13a), 4.35 (1H, d, *J* = 15 Hz; H-13b), 3.86 (3H, s; OMe), 3.77 (3H, s; OMe), 3.71 (3H, s; OMe), 3.69 (6H, s; 2 x OMe), 3.08 (1H, dd, *J* = 14, 6 Hz; tyrosine CH<sub>2</sub>), 3.02 (1H, dd, *J* = 14, 6 Hz; tyrosine CH<sub>2</sub>); <sup>13</sup>C NMR (125 MHz, CDCl<sub>3</sub>)  $\delta$  171.5, 168.6 (C-14, C-1'), 155.4 (tyrosine aromatic carbon), 153.0 (x 2, C-3), 149.2 (C-11), 146.7 (C-10), 137.2 (C-4), 132.7 (x 2; C-1, C-7), 126.8 (tyrosine aromatic carbon), 130.2 (x 2, tyrosine aromatic carbons), 129.4 (C-5 or C-6), 128.9 (C-6 or C-5), 124.2 (C-8), 117.4 (C-9), 115.4 (x 2, tyrosine aromatic carbons), 111.7 (C-12), 106.1 (x 2, C-2), 53.0 (C-2'), 69.8 (C-13), 37.3 (tyrosine  $\beta$ -C), 60.9 (OMe), 56.0 (2 x OMe), 55.7 (OMe), 52.2 (OMe); HR ESMS *m/z* 574.2058 (M+Na)<sup>+</sup>. Calc. for C<sub>30</sub>H<sub>33</sub>NNaO<sub>9</sub>, 574.2053.

**Methyl (Z)-(2-(2-methoxy-5-(3,4,5-trimethoxystyryl)phenoxy)acetyl)-L-methioninate (3.9):** yield, 66%, off-white solid, m. p. 77-79 °C;  $[\alpha]_D +24.9$  (*c* 1.0, CHCl<sub>3</sub>); IR:  $\nu_{\max}$  3350 (br, NH), 1741, 1683 (C=O) cm<sup>-1</sup>; <sup>1</sup>H NMR (500 MHz, CDCl<sub>3</sub>)  $\delta$  7.60 (1H, br d, *J* ~ 8 Hz, NH), 6.98 (1H, dd, *J* = 8.3, 2 Hz; H-8), 6.87 (1H, d, *J* = 2 Hz; H-12), 6.81 (1H, d, *J* = 8.3 Hz; H-9), 6.49 (2H, s; H-2), 6.47 (2H, degenerate AB system, *J* ~ 12 Hz; H-5, H-6), 4.78 (1H, dt, *J* = 8, 6 Hz; H-2'), 4.45 (1H, d, *J* = 15 Hz; H-13a), 4.43 (1H, d, *J* = 15 Hz; H-13b), 3.88 (3H, s; OMe), 3.85 (3H, s; OMe), 3.76 (3H, s; OMe), 3.71 (6H, s; 2 x

OMe), 2.50-2.45 (2H, m; CH<sub>2</sub>S), 2.20 (1H, m; methionine β-H), 2.08 (3H, s; SMe), 2.02 (1H, m; methionine β-H); <sup>13</sup>C NMR (125 MHz, CDCl<sub>3</sub>) δ 171.7, 168.4 (C-14, C-1'); 153.0 (x 2, C-3), 149.0 (C-11), 146.8 (C-10), 137.3 (C-4), 132.5 (C-1), 130.3 (C-7), 129.5, 128.8 (C-5, C-6), 124.1 (C-8), 116.9 (C-9), 111.6 (C-12), 106.0 (x 2, C-2), 50.9 (C-2'), 69.7 (C-13), 31.7 (methionine β-C), 29.7 (CH<sub>2</sub>S); 60.9 (OMe), 55.9 (2 x OMe), 55.8 (OMe), 52.4 (OMe), 15.3 (MeS); HR ESMS *m/z* 542.1832 (M+Na)<sup>+</sup>. Calc. for C<sub>26</sub>H<sub>33</sub>NNaO<sub>8</sub>S, 542.1825.

**(Z)-(2-(2-Methoxy-5-(3,4,5-trimethoxystyryl)phenoxy)acetyl)glycine (4.1):** yield, 71%, off-white solid, m. p. 137-139 °C; IR: *v*<sub>max</sub> 3500-3200 (br, OH, NH), 1735, 1655 (C=O) cm<sup>-1</sup>; <sup>1</sup>H NMR (500 MHz, CD<sub>3</sub>OD) δ 6.94 (1H, dd, *J* = 8.3, 2 Hz; H-8), 6.92 (1H, d, *J* = 8.3 Hz; H-9), 6.90 (1H, d, *J* = 2 Hz; H-12), 6.52 (2H, s; H-2), 6.51 (1H, d, *J* = 12.2 Hz; H-5 or H-6), 6.48 (1H, d, *J* = 12.2 Hz; H-6 or H-5), 4.38 (2H, s; H-13), 3.99 (2H, s; H-2'), 3.85 (3H, s; OMe), 3.75 (3H, s; OMe), 3.65 (6H, s; 2 x OMe) (NH and OH signals were not detected as they may be overlapping with the water signal at 4.80 ppm); <sup>13</sup>C NMR (125 MHz, CD<sub>3</sub>OD) δ 172.5, 171.5 (C-14, C-1'); 154.3 (x 2, C-3), 150.6 (C-11), 148.4 (C-10), 138.4 (C-4), 134.5 (C-1), 131.8 (C-7), 130.5, 130.4 (C-5, C-6), 125.1 (C-8), 118.0 (C-9), 113.3 (C-12), 107.5 (x 2, C-2), 70.4 (C-13), 41.5 (C-2'), 61.2 (OMe), 56.5 (x 2, OMe), 55.8 (OMe); HR ESMS *m/z* 454.1477 (M+Na)<sup>+</sup>. Calc. for C<sub>22</sub>H<sub>25</sub>NNaO<sub>8</sub>, 454.1478.

**(Z)-(2-(2-Methoxy-5-(3,4,5-trimethoxystyryl)phenoxy)acetyl)-L-valine (4.2):** yield, 46%, off-white solid, m. p. 71-73 °C; [α]<sub>D</sub> +14.0 (*c* 1.0, CHCl<sub>3</sub>); IR: *v*<sub>max</sub> 3500-3200 (br, OH, NH), 1736, 1677 (C=O) cm<sup>-1</sup>; <sup>1</sup>H NMR (500 MHz, CD<sub>3</sub>OD) δ 6.95-6.90 (3H, m; H-8, H-9, H-12), 6.52 (2H, s; H-2), 6.50 (1H, d, *J* = 12.2 Hz; H-5 or H-6), 6.47 (1H, d, *J* = 12.2 Hz; H-6 or H-5), 4.40 (3H, br s; H-13a, H-13b, H-2'), 3.84 (3H, s; OMe), 3.74 (3H, s; OMe), 3.64 (6H, s; 2 x OMe), 2.20 (1H, m; valine isopropyl CH), 0.94 (3H, d, *J* = 6.5 Hz; valine isopropyl Me), 0.92 (3H, d, *J* = 6.5 Hz; valine isopropyl Me) (NH and OH signals were not detected as they may be overlapping with the water signal at 4.80 ppm); <sup>13</sup>C NMR (125 MHz, CD<sub>3</sub>OD) δ 174.5\*, 170.9 (C-14, C-1'); 154.3 (x 2, C-3), 150.5 (C-11), 148.5 (C-10), 138.5 (C-4), 134.4 (C-1), 131.9 (C-7), 130.6, 130.3 (C-5, C-6), 125.2 (C-8), 118.1 (C-9), 113.2 (C-12), 107.5 (x 2, C-2), 58.5 (C-2'), 32.1 (valine isopropyl CH), 70.6 (C-13), 61.2 (OMe), 56.5 (OMe), 56.4 (2 x OMe), 19.5, 18.0 (valine isopropyl Me) (the signal marked with \* appears low and broad); HR ESMS *m/z* 496.1945 (M+Na)<sup>+</sup>. Calc. for C<sub>25</sub>H<sub>31</sub>NNaO<sub>8</sub>, 496.1945.

**(Z)-(2-(2-Methoxy-5-(3,4,5-trimethoxystyryl)phenoxy)acetyl)-L-leucine (4.3):** yield, 52%; off-white solid, m. p. 108-110 °C; [α]<sub>D</sub> +1.0 (*c* 1.0, CHCl<sub>3</sub>); IR: *v*<sub>max</sub> 3500-3200 (br, OH, NH), 1735, 1672 (C=O) cm<sup>-1</sup>; <sup>1</sup>H NMR (500 MHz, CD<sub>3</sub>OD) 6.95 (1H, dd, *J* = 8.3, 2 Hz; H-8), 6.92 (1H, d, *J* = 8.3 Hz; H-9), 6.90 (1H, d, *J* = 2 Hz; H-12), 6.52 (2H, s; H-2), 6.50 (1H, d, *J* = 12.2 Hz; H-5 or H-6), 6.47 (1H, d, *J* = 12.2 Hz; H-6 or H-5), 4.53 (1H, dd, *J* = 9, 5 Hz; H-2'), 4.41 (1H, d, *J* = 15.5 Hz; H-13a), 4.37 (1H, d, *J* = 15.5 Hz; H-13b), 3.86 (3H, s; OMe), 3.75 (3H, s; OMe), 3.66 (6H, s; 2 x OMe), 1.75-1.60 (3H, br m; leucine CHCH<sub>2</sub>), 0.93 (3H, d, *J* = 6.5 Hz; leucine isopropyl Me), 0.91 (3H, d, *J* = 6.5 Hz; leucine isopropyl Me) (NH and OH signals are not detected as they may be overlapping with the water signal at 4.80 ppm); <sup>13</sup>C NMR (125 MHz, CD<sub>3</sub>OD) δ 175.3, 171.0 (C-14, C-1'), 154.3 (x 2, C-3), 150.5 (C-11), 148.5 (C-10), 138.5 (C-4), 134.4 (C-1), 132.0 (C-7), 130.6, 130.3 (C-5, C-6), 125.1 (C-8), 118.1 (C-9), 113.3 (C-12), 107.5 (x 2, C-2), 51.6 (C-2'), 26.0 (leucine isopropyl CH), 70.6 (C-13), 41.9 (leucine isopropyl CH<sub>2</sub>), 61.2 (OMe), 56.5 (OMe), 56.4 (2 x OMe), 23.3, 22.0 (leucine isopropyl Me); HR ESMS *m/z* 510.2103 (M+Na)<sup>+</sup>. Calc. for C<sub>26</sub>H<sub>33</sub>NNaO<sub>8</sub>, 510.2104.



**(Z)-(2-(2-Methoxy-5-(3,4,5-trimethoxystyryl)phenoxy)acetyl)-L-phenylalanine (4.4):** yield, 87%, yellowish oil;  $[\alpha]_D +22.6$  (*c* 1.1, CHCl<sub>3</sub>); IR:  $\nu_{\max}$  3500-3200 (br, OH, NH), 1741, 1675 (C=O) cm<sup>-1</sup>; <sup>1</sup>H NMR (500 MHz, CD<sub>3</sub>OD)  $\delta$  7.20-7.16 (3H, m; phenylalanine aromatic protons), 7.14-7.10 (2H, m; phenylalanine aromatic protons), 6.93 (1H, dd, *J* = 8.3, 2 Hz; H-8), 6.85 (1H, d, *J* = 8.3 Hz; H-9), 6.83 (1H, d, *J* = 2 Hz; H-12), 6.51 (2H, s; H-2), 6.47 (2H, app s; H-5, H-6), 4.76 (1H, dd, *J* = 7.3, 5.3 Hz; H-2'), 4.33 (1H, d, *J* = 15 Hz; H-13a), 4.26 (1H, d, *J* = 15 Hz; H-13b), 3.73 (3H, s; OMe), 3.69 (3H, s; OMe), 3.61 (6H, s; 2 x OMe), 3.18 (1H, dd, *J* = 14, 5.3 Hz; phenylalanine CH<sub>2</sub>), 3.04 (1H, dd, *J* = 14, 7.3 Hz; phenylalanine CH<sub>2</sub>) (NH and OH signals are not detected as they may be overlapping with the water signal at 4.80 ppm); <sup>13</sup>C NMR (125 MHz, CD<sub>3</sub>OD)  $\delta$  173.7, 170.7 (C-14, C-1'), 154.3 (x 2, C-3), 150.5 (C-11), 148.5 (C-10), 138.4 (C-4), 137.7 (phenylalanine aromatic), 134.4 (C-1), 131.8 (C-7); 130.5 (C-5 or C-6), 130.4 (x 2, phenylalanine aromatic), 130.3 (C-6 or C-5), 129.5 (x 2, phenylalanine aromatic), 127.9 (phenylalanine aromatic), 125.3 (C-8), 118.2 (C-9), 113.2 (C-12), 107.5 (x 2, C-2), 54.3 (C-2'), 70.6 (C-13), 38.4 (phenylalanine CH<sub>2</sub>); 61.2 (OMe), 56.5 (2 x OMe), 56.4 (OMe); HR ESMS *m/z* 520.1973 (M-H)<sup>-</sup>. Calc. for C<sub>29</sub>H<sub>30</sub>NO<sub>8</sub>, 520.1971.

**(Z)-(2-(2-Methoxy-5-(3,4,5-trimethoxystyryl)phenoxy)acetyl)-L-proline (4.5):** yield, 89%, off-white solid, m. p. 66-68 °C;  $[\alpha]_D -39.8$  (*c* 1.1, CHCl<sub>3</sub>); IR:  $\nu_{\max}$  3500-3200 (br, OH), 1749, 1669 (C=O) cm<sup>-1</sup>; <sup>1</sup>H NMR (500 MHz, CD<sub>3</sub>OD)  $\delta$  6.90-6.80 (3H, m; H-8, H-9, H-12), 6.53 (2H, s; H-2), 6.48 (1H, d, *J* = 12.2 Hz; H-5 or H-6), 6.44 (1H, d, *J* = 12.2 Hz; H-6 or H-5), 4.51 (2H, s; H-13), 4.45 (1H, m; H-2'), 3.80 (3H, s; OMe), 3.74 (3H, s; OMe), 3.65 (6H, s; 2 x OMe), 3.50-3.40 (2H, br m; proline CH<sub>2</sub>N), 2.25-2.15 (1H, m; proline CH<sub>2</sub>), 2.00-1.85 (3H, br m; proline CH<sub>2</sub>) (OH signal not detected as it may be overlapping with the water signal at 4.80 ppm); <sup>13</sup>C NMR (125 MHz, CD<sub>3</sub>OD)  $\delta$  175.2, 169.0 (C-14, C-1'); 154.2 (x 2, C-3), 150.5 (C-11), 148.5 (C-10), 138.3 (C-4), 134.6 (C-1), 131.4 (C-7), 130.6, 130.1 (C-5, C-6), 124.5 (C-8), 116.3 (C-9), 113.3 (C-12), 107.4 (x 2, C-2), 60.4 (C-2'), 68.6 (C-13), 47.1, 29.8, 25.7 (proline 3 x CH<sub>2</sub>); 61.2 (OMe), 56.5 (OMe), 56.4 (2 x OMe); HR ESMS *m/z* 470.1818 (M-H)<sup>-</sup>. Calc. for C<sub>25</sub>H<sub>28</sub>NO<sub>8</sub>, 470.1815.

**(Z)-(2-(2-Methoxy-5-(3,4,5-trimethoxystyryl)phenoxy)acetyl)-L-serine (4.6):** yield, 65%, off-white solid, m. p. 125-128 °C;  $[\alpha]_D -9.8$  (*c* 1.0, CHCl<sub>3</sub>); IR:  $\nu_{\max}$  3500-3200 (br, OH, NH), 1740, 1664 (C=O) cm<sup>-1</sup>; <sup>1</sup>H NMR (500 MHz, CD<sub>3</sub>OD)  $\delta$  6.94 (1H, dd, *J* = 8.3, 2 Hz; H-8), 6.92 (1H, d, *J* = 2 Hz, H-12), 6.91 (1H, d, *J* = 8.3 Hz; H-9), 6.52 (2H, s; H-2), 6.51 (1H, d, *J* = 12 Hz; H-5 or H-6), 6.47 (1H, d, *J* = 12 Hz; H-6 or H-5), 4.51 (1H, br t, *J* ~ 4 Hz; H-2'), 4.41 (1H, d, *J* = 15 Hz; H-13a), 4.37 (1H, d, *J* = 15 Hz; H-13b), 3.98 (1H, dd, *J* = 11.2, 4 Hz; serine CH<sub>2</sub>), 3.85 (1H, dd, overlapped; serine CH<sub>2</sub>), 3.84 (3H, s; OMe), 3.74 (3H, s; OMe), 3.65 (6H, s; 2 x OMe) (NH and two OH signals are not detected as they may be overlapping with the water signal at 4.80 ppm); <sup>13</sup>C NMR (125 MHz, CD<sub>3</sub>OD)  $\delta$  173.3\*, 171.0 (C-14, C-1'); 154.3 (x 2, C-3), 150.7 (C-11), 148.5 (C-10), 138.4 (C-4), 134.4 (C-1), 131.8 (C-7), 130.5, 130.3 (C-5, C-6), 125.2 (C-8), 118.3 (C-9), 113.2 (C-12), 107.5 (x 2, C-2), 55.8\* (serine  $\alpha$ -C); 70.7 (C-13), 62.9 (serine CH<sub>2</sub>); 61.2 (OMe), 56.5 (3 x OMe) (the signals marked with \* appear low and broad); HR ESMS *m/z* 484.1584 (M+Na)<sup>+</sup>. Calc. for C<sub>23</sub>H<sub>27</sub>NNaO<sub>9</sub>, 484.1577.

**(2-(2-Methoxy-5-((Z)-3,4,5-trimethoxystyryl)phenoxy)acetyl)-L-threonine (4.7):** yield, 68%, yellowish oil;  $[\alpha]_D +5.2$  (*c* 1.1, CHCl<sub>3</sub>); IR:  $\nu_{\max}$  3500-3200 (br, OH, NH), 1739, 1664 (C=O) cm<sup>-1</sup>; <sup>1</sup>H NMR (500 MHz, CD<sub>3</sub>OD)  $\delta$  6.94 (1H, dd, *J* = 8.3, 2 Hz; H-8), 6.92 (1H, d, *J* = 2 Hz; H-12), 6.90 (1H, d, *J* = 8.3 Hz; H-9), 6.52 (2H, s; H-2), 6.49 (1H, d, *J* = 12.2 Hz; H-5 or H-6), 6.47 (1H, d, *J* = 12.2 Hz;

H-6 or H-5), 4.46 (1H, br d,  $J \sim 3$  Hz; H-2'), 4.45 (1H, d,  $J = 15$  Hz; H-13a), 4.40 (1H, d,  $J = 15$  Hz; H-13b), 4.37 (1H, qd,  $J = 7, 3$  Hz; threonine  $\beta$ -H), 3.84 (3H, s; OMe), 3.74 (3H, s; OMe), 3.64 (6H, s; 2 x OMe), 1.16 (3H, d,  $J = 7$  Hz; threonine Me) (NH and two OH signals are not detected as they may be overlapping with the water signal at 4.80 ppm);  $^{13}\text{C}$  NMR (125 MHz,  $\text{CD}_3\text{OD}$ )  $\delta$  173.4\*, 171.5 (C-14, C-1'), 154.3 (x 2, C-3), 150.7 (C-11), 148.5 (C-10), 138.4 (C-4), 134.4 (C-1), 131.7 (C-7), 130.5, 130.3 (C-5, C-6), 125.3 (C-8), 118.4 (C-9), 113.2 (C-12), 107.5 (x 2, C-2), 68.3 (C-2'), 58.6 (threonine  $\beta$ -C); 70.8 (C-13), 61.2 (OMe), 56.6 (OMe), 56.5 (2 x OMe), 20.5 (threonine Me) (the signal marked with \* appears low and broad); HR ESMS  $m/z$  474.1766 (M-H) $^-$ . Calc. for  $\text{C}_{24}\text{H}_{28}\text{NO}_9$ , 474.1764.

**(Z)-(2-(2-Methoxy-5-(3,4,5-trimethoxystyryl)phenoxy)acetyl)-L-tyrosine (4.8)**: yield, 97%, off-white solid, m. p. 71-73  $^\circ\text{C}$ ;  $[\alpha]_{\text{D}} +31.5$  (c 1.0,  $\text{CHCl}_3$ ); IR:  $\nu_{\text{max}}$  3500-3200 (br, OH, NH), 1735, 1662 (C=O)  $\text{cm}^{-1}$ ;  $^1\text{H}$  NMR (500 MHz,  $\text{CD}_3\text{OD}$ )  $\delta$  6.95-6.90 (3H, m; H-8 and two tyrosine aromatic protons), 6.86 (1H, d,  $J = 8.3$  Hz; H-9), 6.83 (1H, d,  $J = 2$  Hz; H-12), 6.63 (2H, d,  $J = 8.4$  Hz, tyrosine aromatic protons), 6.51 (2H, s; H-2), 6.48 (2H, app s; H-5 and H-6), 4.68 (1H, dd,  $J = 7, 5.3$  Hz; H-2'), 4.34 (1H, d,  $J = 15$  Hz; H-13a), 4.26 (1H, d,  $J = 15$  Hz; H-13b), 3.74 (3H, s, OMe), 3.72 (3H, s, OMe), 3.62 (6H, s, 2 x OMe), 3.08 (1H, dd,  $J = 14, 5.3$  Hz; tyrosine  $\text{CH}_2$ ), 2.96 (1H, dd,  $J = 14, 7$  Hz; tyrosine  $\text{CH}_2$ ) (NH and two OH signals are not detected as they may be overlapping with the water signal at 4.80 ppm);  $^{13}\text{C}$  NMR (125 MHz,  $\text{CD}_3\text{OD}$ )  $\delta$  174.5\*, 170.7 (C-14, C-1'), 157.3 (tyrosine aromatic carbon), 154.3 (x 2, C-3), 150.5 (C-11), 148.4 (C-10), 138.4 (C-4), 134.5 (C-1), 131.8 (C-7), 128.4 (tyrosine aromatic carbon); 131.4 (x 2, tyrosine aromatic carbons), 130.5, 130.3 (C-5, C-6), 125.3 (C-8), 118.1 (C-9), 116.2 (x 2, tyrosine aromatic carbons), 113.2 (C-12), 107.5 (x 2, C-2), 54.8\* (C-2'), 70.6 (C-13), 37.7 (tyrosine  $\text{CH}_2$ ); 61.2 (OMe), 56.5 (2 x OMe), 56.4 (OMe) (the signals marked with \* appear low and broad); HR ESMS  $m/z$  536.1918 (M-H) $^-$ . Calc. for  $\text{C}_{29}\text{H}_{30}\text{NO}_9$ , 536.1921.

**(Z)-(2-(2-Methoxy-5-(3,4,5-trimethoxystyryl)phenoxy)acetyl)-L-methionine (4.9)**: yield, 76%, off-white solid, m. p. 103-105  $^\circ\text{C}$ ;  $[\alpha]_{\text{D}} +17.0$  (c 1.1,  $\text{CHCl}_3$ ); IR:  $\nu_{\text{max}}$  3500-3200 (br, OH, NH), 1735, 1678 (C=O)  $\text{cm}^{-1}$ ;  $^1\text{H}$  NMR (500 MHz,  $\text{CD}_3\text{OD}$ )  $\delta$  6.94 (1H, dd,  $J = 8.3, 2$  Hz; H-8), 6.92 (1H, d,  $J = 2$  Hz; H-12), 6.90 (1H, d,  $J = 8.3$  Hz; H-9), 6.52 (2H, s, H-2), 6.50 (1H, d,  $J = 12.2$  Hz; H-5 or H-6), 6.48 (1H, d,  $J = 12.2$  Hz; H-6 or H-5), 4.63 (1H, dd,  $J = 8.3, 5$  Hz; H-2'), 4.41 (1H, d,  $J = 15$  Hz; H-13a), 4.38 (1H, d,  $J = 15$  Hz; H-13b), 3.85 (3H, s; OMe), 3.74 (3H, s; OMe), 3.65 (6H, s; 2 x OMe), 2.50-2.40 (2H, br m;  $\text{CH}_2\text{S}$ ), 2.20-2.15 (1H, m; methionine  $\beta$ -H), 2.05 (3H, s; methionine Me), 2.05-1.95 (1H, m; methionine  $\beta$ -H) (NH and OH signals are not detected as they may be overlapping with the water signal at 4.80 ppm);  $^{13}\text{C}$  NMR (125 MHz,  $\text{CD}_3\text{OD}$ )  $\delta$  174.3, 171.1 (C-14, C-1'), 154.3 (x 2, C-3), 150.5 (C-11), 148.5 (C-10), 138.4 (C-4), 134.4 (C-1), 131.9 (C-7), 130.6, 130.3 (C-5, C-6), 125.2 (C-8), 118.1 (C-9), 113.3 (C-12), 107.5 (x 2, C-2), 52.3 (C-2'), 70.6 (C-13), 32.2, 31.0 (2 x methionine  $\text{CH}_2$ ), 61.2 (OMe), 56.6 (OMe), 56.5 (2 x OMe), 15.2 (methionine Me); HR ESMS  $m/z$  528.1676 (M+Na) $^+$ . Calc. for  $\text{C}_{25}\text{H}_{31}\text{NNaO}_8\text{S}$ , 528.1668.

**Methyl (Z)-(2-(2-methoxy-5-(3,4,5-trimethoxystyryl)phenoxy)acetyl)-D-valinate (5.1)**: yield, 92%, yellowish oil;  $[\alpha]_{\text{D}} -11.5$  (c 1.1,  $\text{CHCl}_3$ ); IR,  $^1\text{H}$  NMR,  $^{13}\text{C}$  NMR and HR ESMS data identical to compound **3.2**; HR ESMS  $m/z$  510.2099 (M+Na) $^+$ . Calc. for  $\text{C}_{26}\text{H}_{33}\text{NNaO}_8$ , 510.2104.

**Methyl (Z)-(2-(2-methoxy-5-(3,4,5-trimethoxystyryl)phenoxy)acetyl)-D-leucinate (5.2):** yield, 87%, off-white solid, m. p. 85-87 °C;  $[\alpha]_D -1.4$  (*c* 1.2, CHCl<sub>3</sub>); IR, <sup>1</sup>H NMR, <sup>13</sup>C NMR and HR ESMS data identical to compound **3.3**.

**Methyl (Z)-(2-(2-methoxy-5-(3,4,5-trimethoxystyryl)phenoxy)acetyl)-D-phenylalaninate (5.3):** yield, 38%, yellowish oil;  $[\alpha]_D -25.3$  (*c* 1.0, CHCl<sub>3</sub>); IR, <sup>1</sup>H NMR, <sup>13</sup>C NMR and HR ESMS data identical to compound **3.4**.

**Methyl (Z)-(2-(2-methoxy-5-(3,4,5-trimethoxystyryl)phenoxy)acetyl)-D-prolinate (5.4):** yield, 68%, yellowish oil;  $[\alpha]_D +36.9$  (*c* 1.1, CHCl<sub>3</sub>); IR, <sup>1</sup>H NMR, <sup>13</sup>C NMR and HR ESMS data identical to compound **3.5**.

**Methyl (Z)-(2-(2-methoxy-5-(3,4,5-trimethoxystyryl)phenoxy)acetyl)-D-serinate (5.5):** yield, 70%, off-white solid, m. p. 83-85 °C;  $[\alpha]_D -16.4$  (*c* 1.0, CHCl<sub>3</sub>); IR, <sup>1</sup>H NMR, <sup>13</sup>C NMR and HR ESMS data identical to compound **3.6**.

**(Z)-(2-(2-Methoxy-5-(3,4,5-trimethoxystyryl)phenoxy)acetyl)-D-valine (6.1):** yield, 50%, off-white solid m. p. 71-73 °C;  $[\alpha]_D -14.6$  (*c* 1.0, CHCl<sub>3</sub>); IR, <sup>1</sup>H NMR, <sup>13</sup>C NMR and HR ESMS data identical to compound **4.2**.

**(Z)-(2-(2-Methoxy-5-(3,4,5-trimethoxystyryl)phenoxy)acetyl)-D-leucine (6.2):** yield, 91%, off-white solid, m. p. 105-107 °C;  $[\alpha]_D -0.9$  (*c* 1.0, CHCl<sub>3</sub>); IR, <sup>1</sup>H NMR, <sup>13</sup>C NMR and HR ESMS data identical to compound **4.3**.

**(Z)-(2-(2-Methoxy-5-(3,4,5-trimethoxystyryl)phenoxy)acetyl)-D-phenylalanine (6.3):** yield, 68%, yellowish oil;  $[\alpha]_D -22.8$  (*c* 1.1, CHCl<sub>3</sub>); IR, <sup>1</sup>H NMR, <sup>13</sup>C NMR and HR ESMS data identical to compound **4.4**.

**(Z)-(2-(2-Methoxy-5-(3,4,5-trimethoxystyryl)phenoxy)acetyl)-D-proline (6.4):** yield, 85%, off-white solid, m. p. 67-69 °C;  $[\alpha]_D +46.4$  (*c* 1.1, CHCl<sub>3</sub>); IR, <sup>1</sup>H NMR, <sup>13</sup>C NMR and HR ESMS data identical to compound **4.5**.

**(Z)-(2-(2-Methoxy-5-(3,4,5-trimethoxystyryl)phenoxy)acetyl)-D-serine (6.5):** yield, 67%, off-white solid, m. p. 135-137 °C;  $[\alpha]_D +12.2$  (*c* 1.1, CHCl<sub>3</sub>); IR, <sup>1</sup>H NMR, <sup>13</sup>C NMR and HR ESMS data identical to compound **4.6**.

Signal assignments in the NMR spectra of molecules **7.1-7.9**, **8.1-8.9**, **9.1-9.4** and **10.1-10.4** having the general structures indicated below are based on the following, non-systematic numbering system:

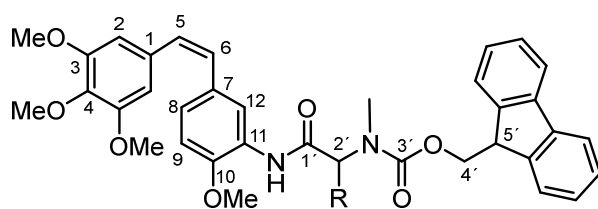

**7.1-7.9** and **9.1-9.4**

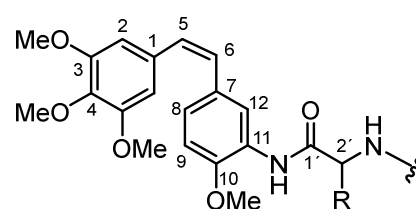

**8.1-8.9** and **10.1-10.4**

**(9H-Fluoren-9-yl)methyl (Z)-((2-methoxy-5-(3,4,5-trimethoxystyryl)phenyl)amino)-2-oxoethyl carbamate (7.1):** yield, 72%, off-white solid, m. p.78-80 °C; IR:  $\nu_{\max}$  3400, 3300 (br NH), 1727, 1686 (C=O)  $\text{cm}^{-1}$ ;  $^1\text{H}$  NMR (500 MHz,  $\text{CDCl}_3$ )  $\delta$  8.30 (1H, br s; H-12), 8.14 (1H, br s, NH), 7.77 (2H, d,  $J \sim 7.5$  Hz; fluorenyl aromatic protons), 7.62 (2H, br d,  $J \sim 7$  Hz; fluorenyl aromatic protons), 7.40 (2H, br t,  $J \sim 7$  Hz; fluorenyl aromatic protons), 7.32 (2H, m; fluorenyl aromatic protons), 7.02 (1H, d,  $J \sim 8.3$  Hz; H-8), 6.71 (1H, d,  $J = 8.8$  Hz; H-9), 6.53 (1H, d,  $J = 12.2$  Hz; H-5 or H-6), 6.52 (2H, s; H-2), 6.45 (1H, d,  $J = 12.2$  Hz; H-6 or H-5), 5.60 (1H, br s, NH), 4.46 (2H, d,  $J = 7.3$  Hz; H-4'), 4.26 (1H, t,  $J = 7.3$  Hz; H-5'), 4.04 (2H, br s; H-2'), 3.85 (3H, s; OMe), 3.79 (3H, s; OMe), 3.69 (6H, s; OMe);  $^{13}\text{C}$  NMR (125 MHz,  $\text{CDCl}_3$ )  $\delta$  166.6 (C-1'), 156.6\* (C-3'), 152.8 (x 2, C-3), 147.1 (C-10), 143.7 (x 2, fluorenyl aromatic carbons), 141.3 (x 2, fluorenyl aromatic carbons), 137.1 (C-4), 132.8 (C-1), 130.2 (C-7), 126.7 (C-11); 129.5, 129.3 (C-5, C-6), 127.7 (x 2, fluorenyl aromatic carbons), 127.1 (x 2, fluorenyl aromatic carbons), 125.0 (x 2, fluorenyl aromatic carbons), 124.7 (C-8), 120.8 (C-9), 120.0 (x 2, fluorenyl aromatic carbons), 109.6 (C-12), 106.1 (x 2, C-2), 47.1 (C-5'), 67.4 (C-4'), 45.4\* (C-2'), 60.8 (OMe), 55.9 (2 x OMe), 55.8 (OMe) (the signals marked with \* appear low and broad); HR ESMS  $m/z$  617.2262 ( $\text{M}+\text{Na}$ ) $^+$ . Calc. for  $\text{C}_{35}\text{H}_{34}\text{N}_2\text{NaO}_7$ , 617.2264.

**(9H-Fluoren-9-yl)methyl (S,Z)-((1-((2-methoxy-5-(3,4,5-trimethoxystyryl)phenyl)amino)-1-oxopropan-2-yl)carbamate (7.2):** yield, 51%; off-white solid, m. p.143-145 °C;  $[\alpha]_{\text{D}} -29.2$  ( $c$  1.0,  $\text{CHCl}_3$ ); IR:  $\nu_{\max}$  3400, 3300 (br NH), 1701, 1686 (C=O)  $\text{cm}^{-1}$ ;  $^1\text{H}$  NMR (500 MHz,  $\text{CDCl}_3$ )  $\delta$  8.33 (1H, br d,  $J \sim 1.5$  Hz; H-12), 8.25 (1H, br s, NH), 7.77 (2H, d,  $J \sim 7.8$  Hz; fluorenyl aromatic protons), 7.60 (2H, br d,  $J \sim 7$  Hz; fluorenyl aromatic protons), 7.40 (2H, br t,  $J \sim 7$  Hz; fluorenyl aromatic protons), 7.31 (2H, m; fluorenyl aromatic protons), 7.02 (1H, dd,  $J = 8.3, 1.5$  Hz; H-8), 6.71 (1H, d,  $J = 8.3$  Hz; H-9), 6.52 (2H, s; H-2), 6.51 (1H, d,  $J = 12.2$  Hz; H-5 or H-6), 6.45 (1H, d,  $J = 12.2$  Hz; H-6 or H-5), 5.40 (1H, br s, NH), 4.50-4.40 (3H, m; H-2', H-4'), 4.25 (1H, t,  $J = 7$  Hz; H-5'), 3.85 (3H, s; OMe), 3.80 (3H, s; OMe), 3.70 (6H, s; 2 x OMe), 1.49 (3H, d,  $J = 7.3$  Hz; alanine Me);  $^{13}\text{C}$  NMR (125 MHz,  $\text{CDCl}_3$ )  $\delta$  170.1 (C-1'), 156.0\* (C-3'); 152.8 (x 2, C-3), 147.1 (C-10), 143.7 (x 2, fluorenyl aromatic carbons), 141.3 (x 2, fluorenyl aromatic carbons), 137.1 (C-4), 132.8 (C-1), 130.1 (C-7), 126.9 (C-11), 129.5, 129.2 (C-5, C-6), 127.7 (x 2, fluorenyl aromatic carbons), 127.1 (x 2, fluorenyl aromatic carbons), 125.0 (x 2, fluorenyl aromatic carbons), 124.7 (C-8), 120.8 (C-9), 120.0 (x 2, fluorenyl aromatic carbons), 109.6 (C-12), 106.1 (x 2, C-2), 51.5\* (C-2'), 47.1 (C-5'), 67.1 (C-4'), 60.8 (OMe), 55.9 (2 x OMe), 55.8 (OMe), 18.6 (alanine Me) (the signals marked with \* appear low and broad); HR ESMS  $m/z$  609.2600 ( $\text{M}+\text{H}$ ) $^+$ . Calc. for  $\text{C}_{36}\text{H}_{37}\text{N}_2\text{O}_7$ , 609.2607.

**(9H-Fluoren-9-yl)methyl (S,Z)-(1-((2-methoxy-5-(3,4,5-trimethoxystyryl)phenyl)amino)-3-methyl-1-oxobutan-2-yl)carbamate (7.3):** yield, 61%, off-white solid, m. p.176-178 °C;  $[\alpha]_D -35.3$  (*c* 1.0, CHCl<sub>3</sub>); IR:  $\nu_{\max}$  3400, 3300 (br NH), 1714, 1683 (C=O) cm<sup>-1</sup>; <sup>1</sup>H NMR (500 MHz, CDCl<sub>3</sub>)  $\delta$  8.34 (1H, br d, *J* ~ 1.5 Hz; H-12), 8.00 (1H, br s, NH), 7.77 (2H, d, *J* ~ 7.5 Hz; fluorenyl aromatic protons), 7.60 (2H, br d, *J* ~ 6 Hz; fluorenyl aromatic protons), 7.40 (2H, br t, *J* ~ 7 Hz; fluorenyl aromatic protons), 7.32 (2H, m; fluorenyl aromatic protons), 7.03 (1H, dd, *J* = 8.3, 1.5 Hz; H-8), 6.72 (1H, d, *J* = 8.3 Hz; H-9), 6.53 (2H, s; H-2), 6.51 (1H, d, *J* = 12.2 Hz; H-5 or H-6), 6.46 (1H, d, *J* = 12.2 Hz; H-6 or H-5), 5.45 (1H, br s, NH), 4.50-4.40 (2H, m; H-4'), 4.24 (1H, t, *J* = 7 Hz; H-5'), 4.14 (1H, m; H-2'), 3.85 (3H, s; OMe), 3.83 (3H, br s; OMe), 3.70 (6H, s; 2 x OMe), 2.22 (1H, dq, *J* = 7, 7, 7 Hz; isopropyl CH), 1.02 (6H, app t, *J* ~ 7 Hz; 2 x isopropyl Me); <sup>13</sup>C NMR (125 MHz, CDCl<sub>3</sub>)  $\delta$  169.2 (C-1'), 156.4 (C-3'), 152.8 (x 2, C-3), 147.2 (C-10), 143.7 (x 2, fluorenyl aromatic carbons), 141.2 (x 2, fluorenyl aromatic carbons), 137.1 (C-4), 132.7 (C-1), 130.1 (C-7), 126.7 (C-11), 129.5, 129.2, 127.6 (x 2, fluorenyl aromatic carbons), 127.0 (x 2, fluorenyl aromatic carbons), 124.9 (x 2, fluorenyl aromatic carbons), 124.7 (C-8), 120.8 (C-9), 119.8 (x 2, fluorenyl aromatic carbons), 109.6 (C-12), 106.0 (x 2, C-2), 61.3 (C-2'), 47.1 (C-5'), 31.2 (isopropyl CH), 67.1 (C-4'), 60.8 (OMe), 55.9 (2 x OMe), 55.8 (OMe), 19.1, 17.8 (2 x isopropyl Me); HR ESMS *m/z* 659.2725 (M+Na)<sup>+</sup>. Calc. for C<sub>38</sub>H<sub>40</sub>N<sub>2</sub>NaO<sub>7</sub>, 659.2733.

**(9H-Fluoren-9-yl)methyl (S,Z)-(1-((2-methoxy-5-(3,4,5-trimethoxystyryl)phenyl)amino)-4-methyl-1-oxopentan-2-yl)carbamate (7.4):** yield, 61%, off-white solid, m. p.72-74 °C;  $[\alpha]_D -34.3$  (*c* 1.0, CHCl<sub>3</sub>); IR:  $\nu_{\max}$  3400, 3320 (br NH), 1701, 1685 (C=O) cm<sup>-1</sup>; <sup>1</sup>H NMR (500 MHz, CDCl<sub>3</sub>)  $\delta$  8.34 (1H, br d, *J* ~ 1.5 Hz; H-12), 8.20 (1H, br s, NH), 7.77 (2H, br d, *J* ~ 7 Hz; fluorenyl aromatic protons), 7.60 (2H, br d, *J* ~ 7 Hz; fluorenyl aromatic protons), 7.40 (2H, br t, *J* ~ 7 Hz; fluorenyl aromatic protons), 7.31 (2H, m; fluorenyl aromatic protons), 7.02 (1H, dd, *J* = 8.3, 1.5 Hz; H-8), 6.70 (1H, d, *J* = 8.3 Hz; H-9), 6.53 (2H, s; H-2), 6.51 (1H, d, *J* = 12.2 Hz; H-5 or H-6), 6.45 (1H, d, *J* = 12.2 Hz; H-6 or H-5), 5.25 (1H, br s, NH), 4.44 (2H, d, *J* = 7 Hz; H-4'), 4.34 (1H, m; H-2'), 4.24 (1H, t, *J* = 7 Hz; H-5'), 3.84 (3H, s; OMe), 3.81 (3H, br s; OMe), 3.69 (6H, s; 2 x OMe), 1.80-1.70 (2H, m; leucine CH<sub>2</sub>), 1.60 (1H, m; leucine CH), 0.99 (6H, br d, *J* ~ 7 Hz; 2 x leucine Me); <sup>13</sup>C NMR (125 MHz, CDCl<sub>3</sub>)  $\delta$  170.1 (C-1'), 156.2 (C-3'), 152.8 (x 2, C-3), 147.2 (C-10), 143.7 (x 2, fluorenyl aromatic carbons), 141.2 (x 2, fluorenyl aromatic carbons), 137.1 (C-4), 132.7 (C-1), 130.1 (C-7), 126.9 (C-11), 129.5, 129.2 (C-5, C-6), 127.6 (x 2, fluorenyl aromatic carbons), 127.0 (x 2, fluorenyl aromatic carbons), 124.9 (x 2, fluorenyl aromatic carbons), 124.6 (C-8), 120.9 (C-9), 119.8 (x 2, fluorenyl aromatic carbons), 109.6 (C-12), 106.0 (x 2, C-2), 54.5 (C-2'), 47.1 (C-5'), 22.1 (isopropyl CH), 67.1 (C-4'), 41.6 (leucine CH<sub>2</sub>), 60.8 (OMe), 55.9 (2 x OMe), 55.8 (OMe), 24.7, 22.8 (2 x isopropyl Me); HR ESMS *m/z* 673.2886 (M+Na)<sup>+</sup>. Calc. for C<sub>39</sub>H<sub>42</sub>N<sub>2</sub>NaO<sub>7</sub>, 673.2890.

**(9H-Fluoren-9-yl)methyl (S,Z)-(1-((2-methoxy-5-(3,4,5-trimethoxystyryl)phenyl)amino)-1-oxo-3-phenylpropan-2-yl)carbamate (7.5):** yield, 59%, off-white solid, m. p.78-80 °C;  $[\alpha]_D -25.0$  (*c* 1.0, CHCl<sub>3</sub>); IR:  $\nu_{\max}$  3400, 3300 (br NH), 1701, 1684 (C=O) cm<sup>-1</sup>; <sup>1</sup>H NMR (500 MHz, CDCl<sub>3</sub>)  $\delta$  8.32 (1H, br d, *J* ~ 1.5 Hz; H-12), 7.95 (1H, br s, NH), 7.77 (2H, br d, *J* ~ 7.3 Hz; fluorenyl aromatic protons), 7.56 (2H, app t, *J* ~ 7 Hz; fluorenyl aromatic protons), 7.40 (2H, br t, *J* ~ 7.3 Hz; fluorenyl aromatic protons), 7.35-7.20 (7H, br m; 2 x fluorenyl aromatic protons + 5 x phenylalanine aromatic protons), 7.01 (1H, dd, *J* = 8.8, 1.5 Hz; H-8), 6.66 (1H, d, *J* = 8.8 Hz; H-9), 6.53 (2H, s; H-2), 6.52 (1H, d, *J* = 12.2 Hz; H-5 or H-6), 6.47 (1H, d, *J* = 12.2 Hz; H-6 or H-5), 5.60 (1H, br s, NH), 4.60 (1H, br s; H-2'),

4.50-4.35 (2H, m; H-4'), 4.22 (1H, t,  $J = 7$  Hz; H-5'), 3.86 (3H, s; OMe), 3.70 (6H, br s; 2 x OMe), 3.68 (3H, s; OMe), 3.25-3.10 (2H, br m; phenylalanine CH<sub>2</sub>); <sup>13</sup>C NMR (125 MHz, CDCl<sub>3</sub>) δ 168.6 (C-1'), 155.9\* (C-3'), 152.8 (x 2, C-3), 147.5 (C-10), 143.7 (x 2, fluorenyl aromatic carbons), 141.2 (x 2, fluorenyl aromatic carbons), 137.1 (C-4), 136.2\* (phenylalanine carbon), 132.7 (C-1), 130.1 (C-7), 126.6\* (C-11), 129.5, 129.3 (C-5, C-6), 129.2 (x 3, three phenylalanine carbons), 128.7 (x 2, two phenylalanine carbons), 127.7 (x 2, fluorenyl aromatic carbons), 127.0 (x 2, fluorenyl aromatic carbons), 125.0 (x 2, fluorenyl aromatic carbons), 124.7 (C-8), 120.8 (C-9), 120.0 (x 2, fluorenyl aromatic carbons), 109.5 (C-12), 106.1 (x 2, C-2), 57.1\* (C-2'), 47.1 (C-5'), 67.2 (C-4'), 38.7 (phenylalanine CH<sub>2</sub>), 60.8 (OMe), 55.9 (2 x OMe), 55.8 (OMe) (the signals marked with \* appear low and broad); HR ESMS  $m/z$  685.2906 (M+H)<sup>+</sup>. Calc. for C<sub>42</sub>H<sub>41</sub>N<sub>2</sub>O<sub>7</sub>, 685.2914.

**(9H-Fluoren-9-yl)methyl (S,Z)-2-((2-methoxy-5-(3,4,5-trimethoxystyryl)phenyl)carbamoyl)pyrrolidine-1-carboxylate (7.6):** yield, 71%, off-white solid, m. p. 70-72 °C; [ $\alpha$ ]<sub>D</sub> -73.3 (*c* 1.0, CHCl<sub>3</sub>); IR:  $\nu_{\max}$  3400, 3300 (br NH), 1700 (br C=O) cm<sup>-1</sup>; <sup>1</sup>H NMR (500 MHz, CDCl<sub>3</sub>) δ 8.90 (1H, br s, NH), 8.38 (1H, br s; H-12), 7.80-7.20 (8H, br m; fluorenyl aromatic protons), 7.10-7.00 (1H, br m; H-8), 6.67 (1H, d,  $J = 8.3$  Hz; H-9), 6.55 (2H, s; H-2), 6.55-6.40 (2H, br m; H-5, H-6), 4.60-4.40 (4H, br m, H-2', H-4', H-5'), 3.85 (6H, s; 2 x OMe), 3.73 (3H, br s; OMe), 3.68 (3H, s; OMe), 3.65-3.60 (2H, br m; CH<sub>2</sub>N), 2.45-2.00 (4H, br m; proline ring protons); <sup>13</sup>C NMR (125 MHz, CDCl<sub>3</sub>) δ 169.4\* (C-1'), 156.0\* (C-3'); 152.8 (x 2, C-3), 147.2 (C-10), 143.7 (x 2, fluorenyl aromatic carbons), 141.2 (x 2, fluorenyl aromatic carbons), 137.2 (C-4), 132.8 (C-1), 130.0 (C-7), 126.9\* (C-11), 129.6, 129.0 (C-5, C-6), 127.7 (x 2, fluorenyl aromatic carbons), 127.0 (x 2, fluorenyl aromatic carbons), 124.9 (x 2, fluorenyl aromatic carbons), 124.4\* (C-8), 120.9\* (C-9), 119.9 (x 2, fluorenyl aromatic carbons), 109.6\* (C-12), 106.1 (x 2, C-2), 61.5\* (C-2'), 47.2 (C-5'), 67.9\* (C-4'), 31.2\*, 28.4\*, 24.5\* (3 x proline ring CH<sub>2</sub>), 60.8 (OMe), 55.8 (2 x OMe), 55.7 (OMe) (the signals marked with \* appear low and broad); HR ESMS  $m/z$  657.2582 (M+Na)<sup>+</sup>. Calc. for C<sub>38</sub>H<sub>38</sub>N<sub>2</sub>NaO<sub>7</sub>, 657.2578.

**(9H-Fluoren-9-yl)methyl ((2S,3R)-3-hydroxy-1-((2-methoxy-5-((Z)-3,4,5-trimethoxystyryl)phenyl)amino)-1-oxobutan-2-yl)carbamate (7.7):** yield, 44%, off-white solid, m. p. 145-147 °C; [ $\alpha$ ]<sub>D</sub> -51.5 (*c* 1.0, CHCl<sub>3</sub>); IR:  $\nu_{\max}$  3400, 3300 (br, OH, NH), 1701, 1684 (C=O) cm<sup>-1</sup>; <sup>1</sup>H NMR (500 MHz, CDCl<sub>3</sub>) δ 8.80 (1H, br s, NH), 8.29 (1H, br s; H-12), 7.76 (2H, br d,  $J \sim 7.3$  Hz; fluorenyl aromatic protons), 7.60 (2H, br d,  $J \sim 7.3$  Hz; fluorenyl aromatic protons), 7.40 (2H, m; fluorenyl aromatic protons), 7.30 (2H, m; fluorenyl aromatic protons), 7.02 (1H, dd,  $J = 8.3, 1.5$  Hz; H-8), 6.69 (1H, d,  $J = 8.3$  Hz; H-9), 6.53 (2H, s; H-2), 6.50 (1H, d,  $J = 12.2$  Hz; H-5 or H-6), 6.45 (1H, d,  $J = 12.2$  Hz; H-6 or H-5), 6.00 (1H, br d,  $J \sim 7$  Hz, NH), 4.50-4.40 (3H, m; H-2', H-4'a, threonine β-H), 4.32 (1H, br d,  $J \sim 7$  Hz; H-4'b), 4.25 (1H, t,  $J = 7$  Hz; H-5'), 3.85 (3H, s; OMe), 3.74 (3H, br s; OMe), 3.69 (6H, s; 2 x OMe), 3.45 (1H, br s, OH), 1.23 (3H, br d,  $J \sim 6.5$  Hz; threonine Me); <sup>13</sup>C NMR (125 MHz, CDCl<sub>3</sub>) δ 168.7 (C-1'), 156.9 (C-3'), 152.8 (x 2, C-3), 147.5 (C-10), 143.6 (x 2, fluorenyl aromatic carbons), 141.2 (x 2, fluorenyl aromatic carbons), 137.1 (C-4), 132.7 (C-1), 130.0 (C-7), 126.7 (C-11), 129.5, 129.2 (C-5, C-6), 127.7 (x 2, fluorenyl aromatic carbons), 127.0 (x 2, fluorenyl aromatic carbons), 125.0 (x 2, fluorenyl aromatic carbons), 124.9 (C-8), 121.1 (C-9), 119.9 (x 2, fluorenyl aromatic carbons), 109.7 (C-12), 106.1 (x 2, C-2), 66.7 (threonine β-C), 59.4 (C-2'), 47.1 (C-5'), 67.4 (C-4'), 60.8 (OMe), 55.9 (2 x OMe), 55.8 (OMe), 18.2 (threonine Me); HR ESMS  $m/z$  661.2521 (M+Na)<sup>+</sup>. Calc. for C<sub>37</sub>H<sub>38</sub>N<sub>2</sub>NaO<sub>8</sub>, 661.2526.

**(9H-Fluoren-9-yl)methyl (S,Z)-(3-(4-hydroxyphenyl)-1-((2-methoxy-5-(3,4,5-trimethoxystyryl)phenyl)amino)-1-oxopropan-2-yl)carbamate (7.8):** yield, 60%, off-white solid, m. p. 94-96 °C;  $[\alpha]_D -25.3$  (*c* 1.0, CHCl<sub>3</sub>); IR:  $\nu_{\max}$  3400, 3300 (br, OH, NH), 1700 (br, C=O) cm<sup>-1</sup>; <sup>1</sup>H NMR (500 MHz, CDCl<sub>3</sub>)  $\delta$  8.20 (1H, br s; H-12), 7.85 (1H, br s, NH), 7.77 (2H, br d, *J* ~ 7.3 Hz; fluorenyl aromatic protons), 7.57 (2H, br d, *J* ~ 4 Hz; fluorenyl aromatic protons), 7.40 (2H, br t, *J* ~ 6.5 Hz), 7.30 (2H, m; fluorenyl aromatic protons), 7.01 (3H, m; H-8 and two tyrosine aromatic protons), 6.68 (3H, m; H-9 and two tyrosine aromatic protons), 6.54 (1H, d, *J* = 12.2 Hz; H-5 or H-6), 6.49 (2H, s; H-2), 6.46 (1H, d, *J* = 12.2 Hz; H-6 or H-5), 5.75 (1H, br s, NH), 5.50 (1H, br s, OH), 4.55-4.35 (3H, m; H-2', H-4'), 4.22 (1H, t, *J* = 6.5 Hz; H-5'), 3.86 (3H, s, OMe), 3.78 (3H, s, OMe), 3.65 (6H, br s, 2 x OMe), 3.14 (1H, m; tyrosine CH<sub>2</sub>), 2.98 (1H, m; tyrosine CH<sub>2</sub>); <sup>13</sup>C NMR (125 MHz, CDCl<sub>3</sub>)  $\delta$  168.9 (C-1'), 156.0\* (C-3'), 155.3 (tyrosine aromatic carbon), 152.8 (x 2, C-3), 147.3 (C-10), 143.6 (x 2, fluorenyl aromatic carbons), 141.2 (x 2, fluorenyl aromatic carbons), 136.8 (C-4), 132.8 (C-1), 130.0 (C-7), 126.4 (C-11), 130.3 (x 2, tyrosine aromatic carbons), 129.6, 129.2 (C-5, C-6), 127.7 (x 3, 2 x fluorenyl + 1 x quaternary tyrosine aromatic carbons), 127.0 (x 2, fluorenyl aromatic carbons), 124.9 (x 2, fluorenyl aromatic carbons), 124.7 (C-8), 120.9\* (C-9), 119.9 (x 2, fluorenyl aromatic carbons), 115.6 (x 2, tyrosine aromatic carbons), 109.6 (C-12), 106.1 (x 2, C-2), 57.3\* (C-2'), 47.1 (C-5'), 67.2\* (C-4'), 37.9 (tyrosine CH<sub>2</sub>); 60.8 (OMe), 55.8 (2 x OMe), 55.7 (OMe) (the signals marked with \* appear low and broad); HR ESMS *m/z* 723.2676 (M+Na)<sup>+</sup>. Calc. for C<sub>42</sub>H<sub>40</sub>N<sub>2</sub>NaO<sub>7</sub>, 723.2682.

**(9H-Fluoren-9-yl)methyl (S,Z)-(1-((2-methoxy-5-(3,4,5-trimethoxystyryl)phenyl)amino)-4-(methylthio)-1-oxobutan-2-yl)carbamate (7.9):** yield, 69%, off-white solid, m. p. 71-73 °C;  $[\alpha]_D -23.3$  (*c* 1.0, CHCl<sub>3</sub>); IR:  $\nu_{\max}$  3400, 3320 (br, NH), 1700, 1686 (br, C=O) cm<sup>-1</sup>; <sup>1</sup>H NMR (500 MHz, CDCl<sub>3</sub>)  $\delta$  8.40 (1H, br s, NH), 8.32 (1H, d, *J* = 1.5 Hz; H-12), 7.76 (2H, d, *J* = 7.8 Hz; fluorenyl aromatic protons), 7.60 (2H, d, *J* = 7.4 Hz; fluorenyl aromatic protons), 7.38 (2H, br t, *J* ~ 7 Hz; fluorenyl aromatic protons), 7.30 (2H, m; fluorenyl aromatic protons), 7.03 (1H, dd, *J* = 8.3, 1.5 Hz; H-8), 6.70 (1H, d, *J* = 8.3 Hz; H-9), 6.54 (2H, s; H-2), 6.51 (1H, d, *J* = 12.2 Hz; H-5 or H-6), 6.45 (1H, d, *J* = 12.2 Hz; H-6 or H-5), 5.80 (1H, br d, *J* ~ 7 Hz, NH), 4.57 (1H, m; H-2'), 4.44 (2H, d, *J* = 7 Hz; H-4'), 4.23 (1H, t, *J* = 7 Hz; H-5'), 3.85 (3H, s; OMe), 3.78 (3H, br s; OMe), 3.69 (6H, s; 2 x OMe), 2.70-2.55 (2H, br m; CH<sub>2</sub>S), 2.20-2.15 (1H, m; methionine  $\beta$ -H), 2.12 (3H, br s; SMe), 2.10-2.05 (1H, m; methionine  $\beta$ -H); <sup>13</sup>C NMR (125 MHz, CDCl<sub>3</sub>)  $\delta$  169.0 (C-1'), 156.0\* (C-3'), 152.8 (x 2), 147.3 (C-10), 143.7 (x 2, fluorenyl aromatic carbons), 141.2 (x 2, fluorenyl aromatic carbons), 137.2 (C-4), 132.8 (C-1), 130.1 (C-7), 126.7\* (C-11), 129.5, 129.2 (C-5, C-6), 127.7 (x 2, fluorenyl aromatic carbons), 127.0 (x 2, fluorenyl aromatic carbons), 124.9 (x 2, fluorenyl aromatic carbons), 124.8 (C-8), 121.0 (C-9)\*, 119.9 (x 2, fluorenyl aromatic carbons), 109.6 (C-12), 106.1 (x 2, C-2), 54.6\* (C-2'), 47.1 (C-5'), 67.1\* (C-4'), 31.6, 30.1 (2 x methionine CH<sub>2</sub>), 60.8 (OMe), 55.8 (2 x OMe), 55.7 (OMe), 15.1 (MeS) (the signals marked with \* appear low and broad); HR ESMS *m/z* 691.2460 (M+Na)<sup>+</sup>. Calc. for C<sub>38</sub>H<sub>40</sub>N<sub>2</sub>NaO<sub>7</sub>S, 691.2454.

**(Z)-2-Amino-N-(2-methoxy-5-(3,4,5-trimethoxystyryl)phenyl)acetamide (8.1):** yield, 59%, colorless oil; IR:  $\nu_{\max}$  3400, 3300 (br, NH, NH<sub>2</sub>), 1683 (br, C=O) cm<sup>-1</sup>; <sup>1</sup>H NMR (500 MHz, CDCl<sub>3</sub>) 9.60 (1H, br s, NH), 8.37 (1H, br s; H-12), 7.00 (1H, dd, *J* = 8.3, 1.5 Hz; H-8), 6.73 (1H, d, *J* = 8.3 Hz; H-9), 6.54 (1H, d, *J* = 12.2 Hz; H-5 or H-6), 6.52 (2H, s; H-2), 6.44 (1H, d, *J* = 12.2 Hz; H-6 or H-5), 3.87 (3H, s; OMe), 3.83 (3H, s; OMe), 3.68 (6H, s; 2 x OMe), 3.50 (2H, br s; H-2'), 2.00 (2H, br s, NH<sub>2</sub>); <sup>13</sup>C NMR

(125 MHz, CDCl<sub>3</sub>)  $\delta$  170.5 (C-1'), 152.8 (x 2; C-3), 147.5 (C-10), 137.1 (C-4), 132.8 (C-1), 130.1 (C-7), 127.2 (C-11), 129.8, 129.0 (C-5, C-6), 124.2 (C-8), 120.6 (C-9), 109.6 (C-12), 106.1 (x 2, C-2), 45.5 (C-2'), 60.8 (OMe), 55.9 (2 x OMe), 55.8 (OMe); HR ESMS  $m/z$  373.1769 (M+H)<sup>+</sup>. Calc. for C<sub>20</sub>H<sub>25</sub>N<sub>2</sub>O<sub>5</sub>, 373.1763.

**(S,Z)-2-Amino-N-(2-methoxy-5-(3,4,5-trimethoxystyryl)phenyl)propanamide (8.2):** yield, 41%, colorless oil; [ $\alpha$ ]<sub>D</sub> -7.6 (*c* 1.0, CHCl<sub>3</sub>); IR:  $\nu_{\max}$  3300 (br, NH, NH<sub>2</sub>), 1685 (br, C=O) cm<sup>-1</sup>; <sup>1</sup>H NMR (500 MHz, CDCl<sub>3</sub>)  $\delta$  9.75 (1H, br s, NH), 8.42 (1H, d, *J* = 2 Hz; H-12), 7.00 (1H, dd, *J* = 8.8, 2 Hz; H-8), 6.72 (1H, d, *J* = 8.8 Hz; H-9), 6.54 (1H, d, *J* = 12.2 Hz; H-5 or H-6), 6.53 (2H, s; H-2), 6.43 (1H, d, *J* = 12.2 Hz; H-6 or H-5), 3.87 (3H, s; OMe), 3.84 (3H, s; OMe), 3.69 (6H, s; 2 x OMe), 3.65 (1H, q, *J* = 7 Hz; H-2'), 1.80 (2H, br s, NH<sub>2</sub>), 1.43 (3H, d, *J* = 7 Hz; alanine Me); <sup>13</sup>C NMR (125 MHz, CDCl<sub>3</sub>)  $\delta$  173.6 (C-1'), 152.8 (x 2, C-3), 147.5 (C-10), 137.1 (C-4), 132.9 (C-1), 130.1 (C-7), 127.3 (C-11), 129.9, 129.0 (C-5, C-6), 124.2 (C-8), 120.5 (C-9), 109.6 (C-12), 106.1 (x 2, C-2), 51.6 (C-2'); 60.8 (OMe), 55.9 (2 x OMe), 55.8 (OMe), 21.7 (alanine Me); HR ESMS  $m/z$  387.1925 (M+H)<sup>+</sup>. Calc. for C<sub>21</sub>H<sub>27</sub>N<sub>2</sub>O<sub>5</sub>, 387.1920.

**(S,Z)-2-Amino-N-(2-methoxy-5-(3,4,5-trimethoxystyryl)phenyl)-3-methylbutanamide (8.3):** yield, 87%, colorless oil; [ $\alpha$ ]<sub>D</sub> -34.4 (*c* 0.7, CHCl<sub>3</sub>); IR:  $\nu_{\max}$  3400, 3300 (br, NH, NH<sub>2</sub>), 1682 (C=O) cm<sup>-1</sup>; <sup>1</sup>H NMR (500 MHz, CDCl<sub>3</sub>)  $\delta$  9.75 (1H, br s, NH), 8.42 (1H, d, *J* = 2 Hz; H-12), 6.99 (1H, dd, *J* = 8.3, 2 Hz; H-8), 6.72 (1H, d, *J* = 8.3 Hz; H-9), 6.53 (2H, s; H-2), 6.52 (1H, d, *J* = 12.2 Hz; H-5 or H-6), 6.42 (1H, d, *J* = 12.2 Hz; H-6 or H-5), 3.86 (3H, s; OMe), 3.83 (3H, s; OMe), 3.68 (6H, s; 2 x OMe), 3.36 (1H, d, *J* = 4 Hz; H-2'), 2.39 (1H, m; valine  $\beta$ -H), 1.55 (2H, br s, NH<sub>2</sub>), 1.03 (3H, d, *J* = 6.8 Hz; valine Me), 0.87 (3H, d, *J* = 6.8 Hz; valine Me); <sup>13</sup>C NMR (125 MHz, CDCl<sub>3</sub>)  $\delta$  172.4 (C-1'), 152.8 (x 2, C-3), 147.5 (C-10), 137.1 (C-4), 132.9 (C-1), 130.1 (C-7), 127.3 (C-11), 129.8, 128.9 (C-5, C-6), 124.1 (C-8), 120.5 (C-9), 109.6 (C-12), 106.1 (x 2, C-2), 60.8 (C-2'), 30.9 (valine  $\beta$ -C), 60.9 (OMe), 55.9 (x 2, OMe), 55.8 (OMe), 19.7, 16.1 (2 x valine Me); HR ESMS  $m/z$  415.2235 (M+H)<sup>+</sup>. Calc. for C<sub>23</sub>H<sub>31</sub>N<sub>2</sub>O<sub>5</sub>, 415.2233.

**(S,Z)-2-Amino-N-(2-methoxy-5-(3,4,5-trimethoxystyryl)phenyl)-4-methylpentanamide (8.4):** yield, 87%, colorless oil; [ $\alpha$ ]<sub>D</sub> -19.7 (*c* 1.0, CHCl<sub>3</sub>); IR:  $\nu_{\max}$  3400, 3300 (br, NH, NH<sub>2</sub>), 1684 (C=O) cm<sup>-1</sup>; <sup>1</sup>H NMR (500 MHz, CDCl<sub>3</sub>)  $\delta$  9.80 (1H, br s, NH), 8.41 (1H, d, *J* = 2 Hz; H-12), 6.99 (1H, dd, *J* = 8.3, 2 Hz; H-8), 6.72 (1H, d, *J* = 8.3 Hz; H-9), 6.53 (2H, s; H-2), 6.52 (1H, d, *J* = 12.2 Hz; H-5 or H-6), 6.43 (1H, d, *J* = 12.2 Hz; H-6 or H-5), 3.87 (3H, s; OMe), 3.83 (3H, s; OMe), 3.68 (6H, s; 2 x OMe), 3.51 (1H, br dd, *J* ~ 9.5, 3 Hz; H-2'), 1.85-1.75 (2H, m; leucine CH<sub>2</sub>), 1.60 (2H, br s, NH<sub>2</sub>), 1.44 (1H, m; isopropyl CH), 0.99 (3H, d, *J* = 6.5 Hz; isopropyl Me), 0.97 (3H, d, *J* = 6.5 Hz; isopropyl Me); <sup>13</sup>C NMR (125 MHz, CDCl<sub>3</sub>)  $\delta$  173.5 (C-1'), 152.8 (x 2, C-3), 147.5 (C-10), 137.1 (C-4), 132.9 (C-1), 130.1 (C-7), 127.4 (C-11), 129.9, 128.9 (C-5, C-6), 124.0 (C-8), 120.5 (C-9), 109.5 (C-12), 106.1 (x 2, C-2), 54.4 (C-2'), 25.0 (isopropyl CH), 44.1 (leucine CH<sub>2</sub>), 60.8 (OMe), 55.9 (2 x OMe), 55.8 (OMe), 23.3, 21.4 (2 x isopropyl Me); HR ESMS  $m/z$  429.2390 (M+H)<sup>+</sup>. Calc. for C<sub>24</sub>H<sub>33</sub>N<sub>2</sub>O<sub>5</sub>, 429.2389.

**(S,Z)-2-Amino-N-(2-methoxy-5-(3,4,5-trimethoxystyryl)phenyl)-3-phenylpropanamide (8.5):** yield, 72%, off-white solid m. p. 40-42 °C; [ $\alpha$ ]<sub>D</sub> -60.0 (*c* 0.9, CHCl<sub>3</sub>); IR:  $\nu_{\max}$  3300 (br, NH, NH<sub>2</sub>), 1683 (C=O) cm<sup>-1</sup>; <sup>1</sup>H NMR (500 MHz, CDCl<sub>3</sub>)  $\delta$  9.80 (1H, br s, NH), 8.45 (1H, d, *J* = 2 Hz; H-12), 7.35-7.25 (5H, br m; phenylalanine aromatic protons), 7.01 (1H, dd, *J* = 8.3, 1.5 Hz; H-8), 6.72 (1H, d, *J* = 8.3 Hz;



H-9), 6.55 (1H, d,  $J = 12.2$  Hz; H-5 or H-6), 6.54 (2H, s; H-2), 6.45 (1H, d,  $J = 12.2$  Hz; H-6 or H-5), 3.85 (6H, s; 2 x OMe), 3.72 (1H, m; H-2'), 3.70 (6H, s; 2 x OMe), 3.38 (1H, dd,  $J = 13.5, 3.5$  Hz; phenylalanine  $\beta$ -H), 2.78 (1H, dd,  $J = 13.5, 9.8$  Hz; phenylalanine  $\beta$ -H), 1.55 (2H, br s, NH<sub>2</sub>); <sup>13</sup>C NMR (125 MHz, CDCl<sub>3</sub>)  $\delta$  172.2 (C-1'), 152.8 (x 2, C-2), 147.6 (C-10), 137.9 (phenylalanine aromatic carbon), 137.1 (C-4), 132.9 (C-1), 130.1 (C-7), 126.8 (C-11), 129.8 (C-5 or C-6), 129.2 (x 3, phenylalanine aromatic carbons), 129.0 (C-6 or C-5), 128.7 (x 2, phenylalanine aromatic carbons), 124.2 (C-8), 120.5 (C-9), 109.5 (C-12), 106.1 (x 2, C-2), 57.3 (C-2'), 40.8 (phenylalanine CH<sub>2</sub>), 60.8 (OMe), 55.9 (2 x OMe), 55.8 (OMe); HR ESMS  $m/z$  463.2229 (M+H)<sup>+</sup>. Calc. for C<sub>27</sub>H<sub>31</sub>N<sub>2</sub>O<sub>5</sub>, 463.2233.

**(S,Z)-N-(2-Methoxy-5-(3,4,5-trimethoxystyryl)phenyl)pyrrolidine-2-carboxamide (8.6):** yield, 54%, colorless oil; [ $\alpha$ ]<sub>D</sub> -34.1 (*c* 1.0, CHCl<sub>3</sub>); IR:  $\nu_{\max}$  3300 (br, NH), 1684 (C=O) cm<sup>-1</sup>; <sup>1</sup>H NMR (500 MHz, CDCl<sub>3</sub>)  $\delta$  10.0 (1H, br s, NH), 8.39 (1H, d,  $J = 2$  Hz; H-12), 7.00 (1H, dd,  $J = 8.3, 2$  Hz; H-8), 6.71 (1H, d,  $J = 8.3$  Hz; H-9), 6.53 (2H, s; H-2), 6.52 (1H, d,  $J = 12.2$  Hz; H-5 or H-6), 6.43 (1H, d,  $J = 12.2$  Hz; H-6 or H-5), 3.88 (1H, m; H-2'), 3.86 (3H, s; OMe), 3.84 (3H, s; OMe), 3.69 (6H, s; 2 x OMe), 3.10, 3.02 (2 x 1H, m; CH<sub>2</sub>N), 2.20 (2H, m; NH + proline ring CH), 2.05 (1H, m; proline ring CH), 1.80-1.75 (2H, m; 2 proline ring CH); <sup>13</sup>C NMR (125 MHz, CDCl<sub>3</sub>)  $\delta$  173.1 (C-1'), 152.8 (x 2, C-3), 147.6 (C-10), 137.1 (C-4), 132.8 (C-1), 130.1 (C-7), 127.3 (C-11), 129.8, 128.9 (C-5, C-6), 124.1 (C-8), 120.5 (C-9), 109.6 (C-12), 106.1 (x 2, C-2), 61.4 (C-2'), 47.3, 30.8, 26.2 (proline ring CH<sub>2</sub>), 60.8 (OMe), 55.9 (2 x OMe), 55.8 (OMe); HR ESMS  $m/z$  413.2070 (M+H)<sup>+</sup>. Calc. for C<sub>23</sub>H<sub>29</sub>N<sub>2</sub>O<sub>5</sub>, 413.2076.

**(2S,3R)-2-Amino-3-hydroxy-N-(2-methoxy-5-((Z)-3,4,5-trimethoxystyryl)phenyl)butanamide (8.7):** yield, 51%, colorless oil; [ $\alpha$ ]<sub>D</sub> -8.2 (*c* 0.7, CHCl<sub>3</sub>); IR:  $\nu_{\max}$  3450, 3300 (br, OH, NH, NH<sub>2</sub>), 1683 (C=O) cm<sup>-1</sup>, NMR MN <sup>1</sup>H NMR (500 MHz, CDCl<sub>3</sub>)  $\delta$  9.85 (1H, br s, NH), 8.37 (1H, d,  $J = 2$  Hz; H-12), 7.01 (1H, dd,  $J = 8.3, 2$  Hz; H-8), 6.72 (1H, d,  $J = 8.3$  Hz; H-9), 6.52 (2H, s; H-2), 6.51 (1H, d,  $J = 12.2$  Hz; H-5 or H-6), 6.43 (1H, d,  $J = 12.2$  Hz; H-6 or H-5), 4.40 (1H, qd,  $J = 6.5, 2.5$  Hz; threonine  $\beta$ -H), 3.86 (3H, s; OMe), 3.84 (3H, s; OMe), 3.69 (6H, s; 2 x OMe), 3.35 (1H, br d,  $J \sim 2.5$  Hz; H-2'), 2.10 (3H, br s, OH, NH<sub>2</sub>), 1.25 (3H, d,  $J = 6.5$  Hz; threonine Me); <sup>13</sup>C NMR (125 MHz, CDCl<sub>3</sub>)  $\delta$  171.7 (C-1'), 152.8 (x 2, C-3), 147.6 (C-10), 137.1 (C-4), 132.8 (C-1), 130.1 (C-7), 127.0 (C-11), 129.7, 129.0 (C-5, C-6), 124.5 (C-8), 120.6 (C-9), 109.6 (C-12), 106.1 (x 2, C-2), 67.8 (threonine  $\beta$ -C), 60.4 (C-2'), 60.9 (OMe), 55.9 (2 x OMe), 55.8 (OMe), 19.0 (threonine Me); HR ESMS  $m/z$  417.2024 (M+H)<sup>+</sup>. Calc. for C<sub>22</sub>H<sub>29</sub>N<sub>2</sub>O<sub>6</sub>, 417.2026.

**(S,Z)-2-Amino-3-(4-hydroxyphenyl)-N-(2-methoxy-5-(3,4,5-trimethoxystyryl)phenyl)propanamide (8.8):** yield, 75%, off-white solid 63-65 °C; [ $\alpha$ ]<sub>D</sub> -61.1 (*c* 0.9, CHCl<sub>3</sub>); IR:  $\nu_{\max}$  3400, 3300 (br, OH, NH, NH<sub>2</sub>), 1682 (C=O) cm<sup>-1</sup>; <sup>1</sup>H NMR (500 MHz, CDCl<sub>3</sub>)  $\delta$  9.70 (1H, br s, NH), 8.37 (1H, d,  $J = 2$  Hz; H-12), 7.07 (2H, d,  $J = 8.2$  Hz; tyrosine aromatic protons), 7.01 (1H, dd,  $J = 8.3, 2$  Hz; H-8), 6.75 (2H, d,  $J = 8$ ; tyrosine aromatic protons), 6.72 (1H, d,  $J = 8.3$  Hz; H-9), 6.56 (1H, d,  $J = 12.2$  Hz; H-5 or H-6), 6.52 (2H, s; H-2), 6.45 (1H, d,  $J = 12.2$  Hz; H-5 or H-6), 3.85 (3H, s; OMe), 3.84 (3H, s; OMe), 3.68 (1H, m; H-2'), 3.66 (6H, s; 2 x OMe), 3.17 (1H, dd,  $J = 13.5, 3.5$  Hz; tyrosine  $\beta$ -H), 2.82 (1H, dd,  $J = 13.5, 8.8$  Hz; tyrosine  $\beta$ -H) (OH/NH<sub>2</sub> signals are not observed); <sup>13</sup>C NMR (125 MHz, CDCl<sub>3</sub>)  $\delta$  172.7 (C-1'), 155.3 (tyrosine aromatic carbon), 152.8 (x 2, C-3), 147.7 (C-10), 136.9 (C-4), 132.9 (C-1), 130.1 (C-7), 128.6 (tyrosine aromatic carbon), 126.9 (C-11), 130.3 (x 2, tyrosine aromatic carbons), 129.8, 129.1 (C-5, C-6), 124.4 (C-8), 120.7 (C-9), 115.7 (x 2, tyrosine aromatic carbons), 109.7 (C-12), 106.1

(x 2, C-2), 57.3 (C-2'), 40.0 (tyrosine CH<sub>2</sub>), 60.9 (OMe), 55.9 (2 x OMe), 55.8 (OMe); HR ESMS *m/z* 479.2187 (M+H)<sup>+</sup>. Calc. for C<sub>27</sub>H<sub>31</sub>N<sub>2</sub>O<sub>6</sub>, 479.2182.

**(*S,Z*)-2-Amino-*N*-(2-methoxy-5-(3,4,5-trimethoxystyryl)phenyl)-4-(methylthio)butanamide (8.9):** yield, 79%, colorless oil; [α]<sub>D</sub> -15.5 (*c* 0.7, CHCl<sub>3</sub>); IR: *v*<sub>max</sub> 3300 (br, NH, NH<sub>2</sub>), 1683 (C=O) cm<sup>-1</sup>; <sup>1</sup>H NMR (500 MHz, CDCl<sub>3</sub>) δ 9.75 (1H, br s, NH), 8.38 (1H, d, *J* = 2 Hz; H-12), 7.00 (1H, dd, *J* = 8.3, 2 Hz; H-8), 6.71 (1H, d, *J* = 8.3 Hz; H-9), 6.52 (1H, d, *J* = 12.2 Hz; H-5 or H-6), 6.51 (2H, s; H-2), 6.42 (1H, d, *J* = 12.2 Hz; H-6 or H-5), 3.85 (3H, s; OMe), 3.83 (3H, s; OMe), 3.66 (6H, s; 2 x OMe), 3.64 (1H, dd, *J* = 8.3, 4.5 Hz; H-2'), 2.65 (2H, m; CH<sub>2</sub>S), 2.26 (1H, m; methionine β-H), 2.11 (3H, s; SMe), 1.84 (1H, m; methionine β-H), 1.65 (2H, br s, NH<sub>2</sub>); <sup>13</sup>C NMR (125 MHz, CDCl<sub>3</sub>) δ 172.5 (C-1'), 152.8 (x 2, C-3), 147.5 (C-10), 137.0 (C-4), 132.8 (C-1), 130.1 (C-7), 127.2 (C-11), 129.7, 129.0 (C-5, C-6), 124.2 (C-8), 120.5 (C-9), 109.5 (C-12), 106.1 (x 2, C-2), 55.0 (C-2'), 34.0, 30.6 (2 x methionine CH<sub>2</sub>), 60.8 (OMe), 55.9 (2 x OMe), 55.8 (OMe), 15.2 (methionine Me); HR ESMS *m/z* 447.1954 (M+H)<sup>+</sup>. Calc. for C<sub>23</sub>H<sub>31</sub>N<sub>2</sub>O<sub>5</sub>S, 447.1954.

**(9*H*-fluoren-9-yl)methyl (*R,Z*)-(1-((2-methoxy-5-(3,4,5-trimethoxystyryl)phenyl)amino)-3-methyl-1-oxobutan-2-yl)carbamate (9.1):** yield, 55%, off-white solid, m. p. 176-178 °C; [α]<sub>D</sub> +36 (*c* 1.0, CHCl<sub>3</sub>); IR, <sup>1</sup>H NMR, <sup>13</sup>C NMR and HR ESMS data identical to compound 7.3.

**(9*H*-fluoren-9-yl)methyl (*R,Z*)-(1-((2-methoxy-5-(3,4,5-trimethoxystyryl)phenyl)amino)-4-methyl-1-oxopentan-2-yl)carbamate (9.2):** yield, 60%, off-white solid, m. p. 72-74 °C; [α]<sub>D</sub> +34.0 (*c* 0.9, CHCl<sub>3</sub>); IR, <sup>1</sup>H NMR, <sup>13</sup>C NMR and HR ESMS data identical to compound 7.4.

**(9*H*-fluoren-9-yl)methyl (*R,Z*)-(1-((2-methoxy-5-(3,4,5-trimethoxystyryl)phenyl)amino)-1-oxo-3-phenylpropan-2-yl)carbamate (9.3):** yield, 69%, off-white solid, m. p. 76-78 °C; [α]<sub>D</sub> +24.0 (*c* 1.0, CHCl<sub>3</sub>); IR, <sup>1</sup>H NMR, <sup>13</sup>C NMR and HR ESMS data identical to compound 7.5.

**(9*H*-fluoren-9-yl)methyl (*R,Z*)-2-((2-methoxy-5-(3,4,5-trimethoxystyryl)phenyl)-carbamoyl)pyrrolidine-1-carboxylate (9.4):** yield, 73%, off-white solid, m. p. 69-71 °C; [α]<sub>D</sub> +73.2 (*c* 0.95, CHCl<sub>3</sub>); IR, <sup>1</sup>H NMR, <sup>13</sup>C NMR and HR ESMS data identical to compound 7.6.

**(*R,Z*)-2-Amino-*N*-(2-methoxy-5-(3,4,5-trimethoxystyryl)phenyl)-3-methylbutanamide (10.1):** yield, 71%, colorless oil; [α]<sub>D</sub> +30.8 (*c* 0.9, CHCl<sub>3</sub>); IR, <sup>1</sup>H NMR, <sup>13</sup>C NMR and HR ESMS data identical to compound 8.3.

**(*R,Z*)-2-Amino-*N*-(2-methoxy-5-(3,4,5-trimethoxystyryl)phenyl)-4-methylpentanamide (10.2):** yield, 67%, colorless oil; [α]<sub>D</sub> +19.8 (*c* 0.9, CHCl<sub>3</sub>); IR, <sup>1</sup>H NMR, <sup>13</sup>C NMR and HR ESMS data identical to compound 8.4.

**(*R,Z*)-2-Amino-*N*-(2-methoxy-5-(3,4,5-trimethoxystyryl)phenyl)-3-phenylpropanamide (10.3):** yield, 84%, off-white solid, m. p. 40-42 °C; [α]<sub>D</sub> +72.1 (*c* 1.0, CHCl<sub>3</sub>); IR, <sup>1</sup>H NMR, <sup>13</sup>C NMR and HR ESMS data identical to compound 8.5.

**(*R,Z*)-*N*-(2-Methoxy-5-(3,4,5-trimethoxystyryl)phenyl)pyrrolidine-2-carboxamide (10.4):** yield, 68%. colorless oil; [α]<sub>D</sub> +32 (*c* 1.0, CHCl<sub>3</sub>); IR, <sup>1</sup>H NMR, <sup>13</sup>C NMR and HR ESMS data identical to compound 8.6.

## Graphical NMR spectra

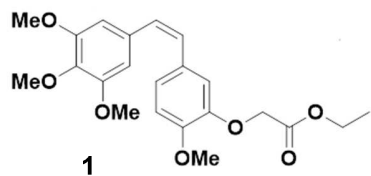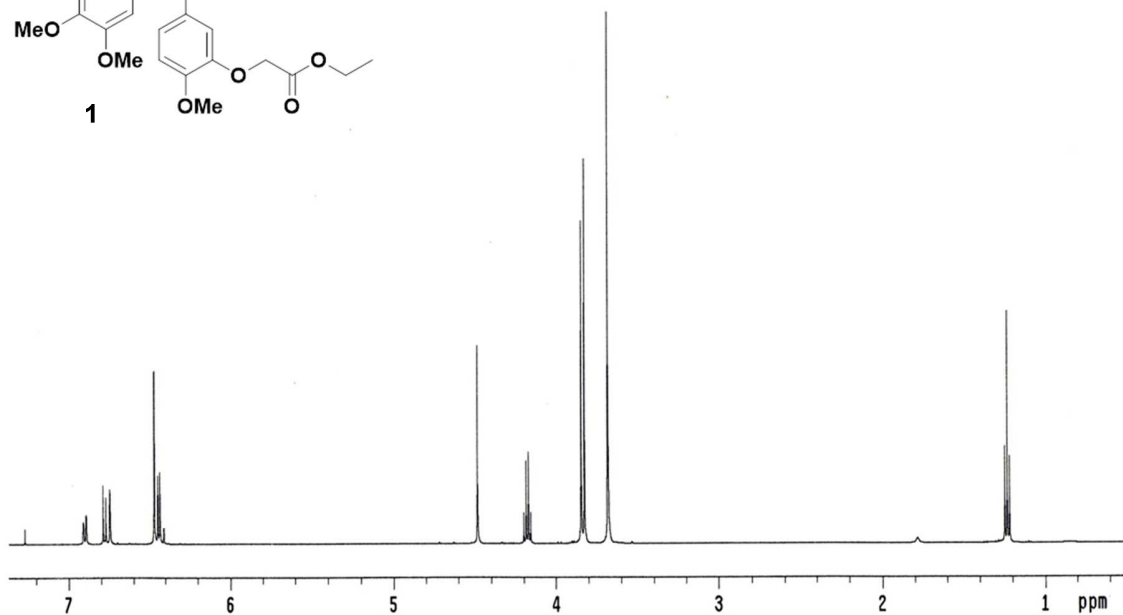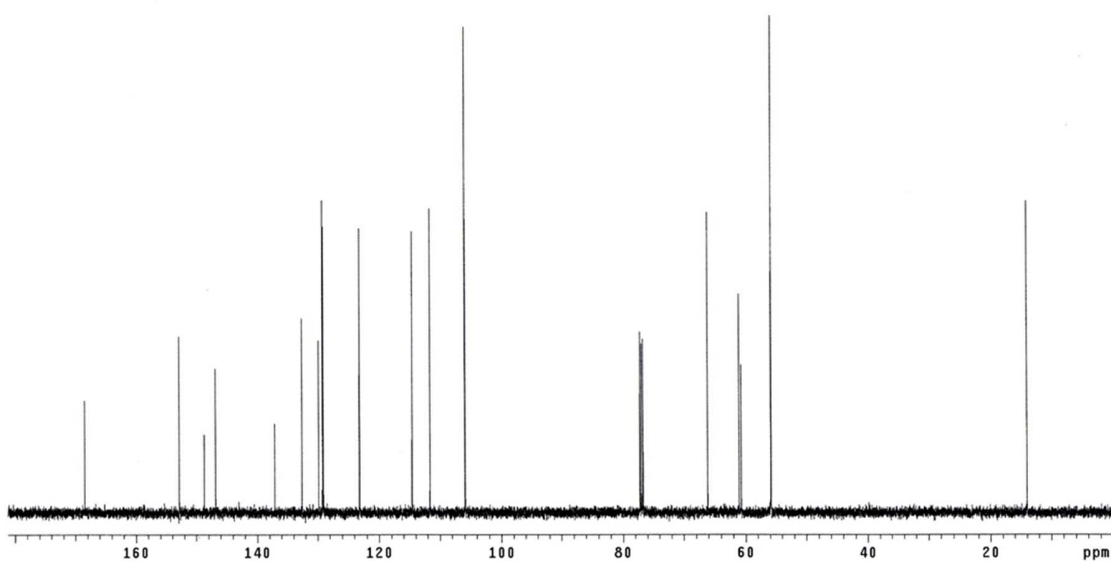

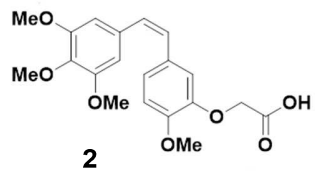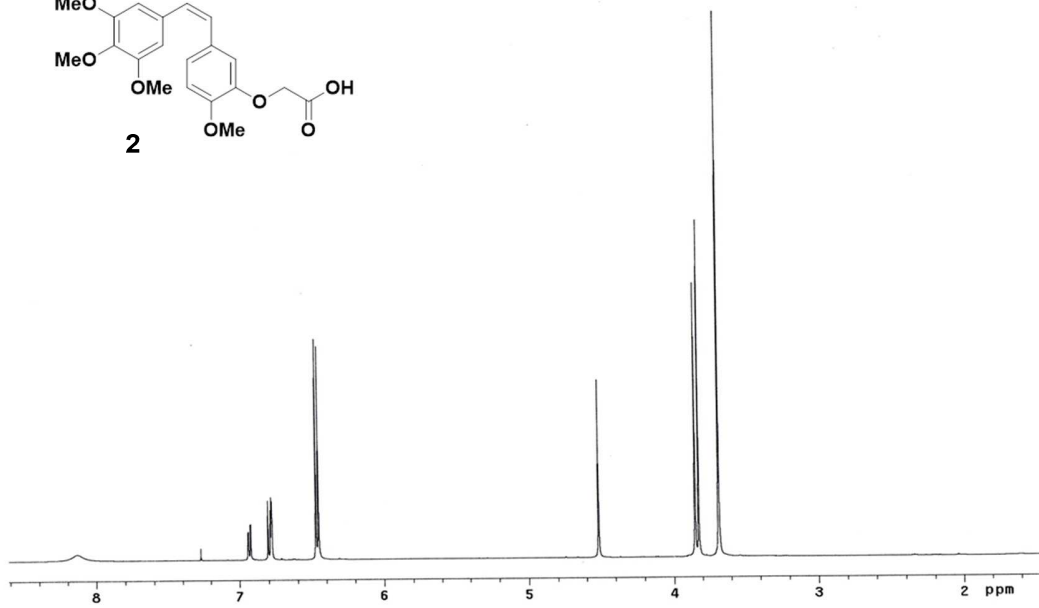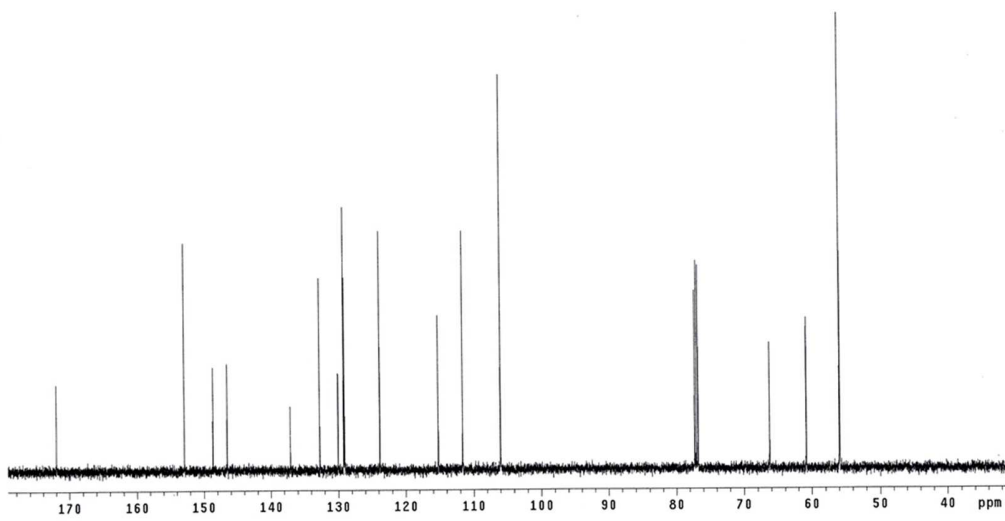

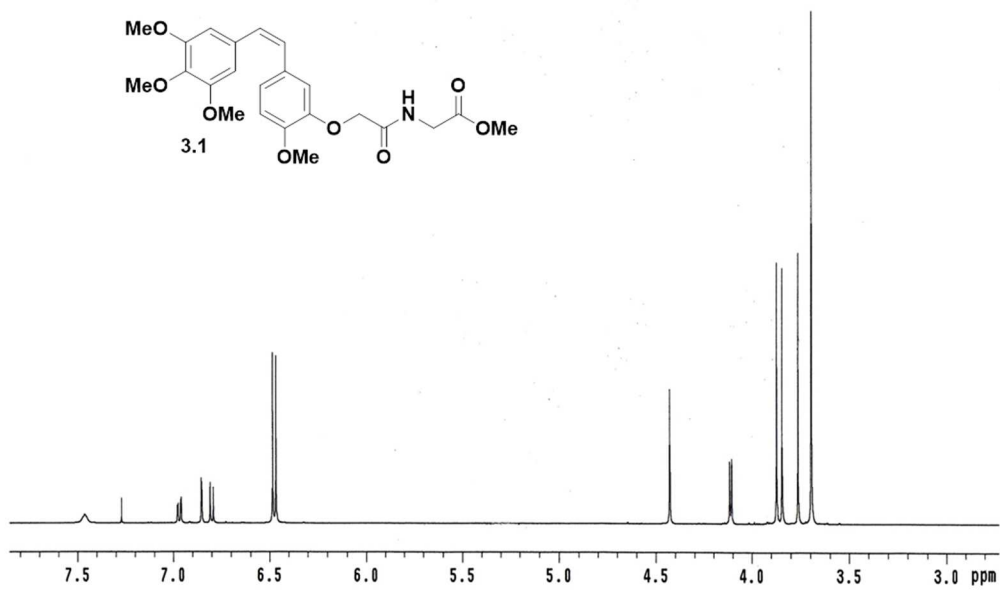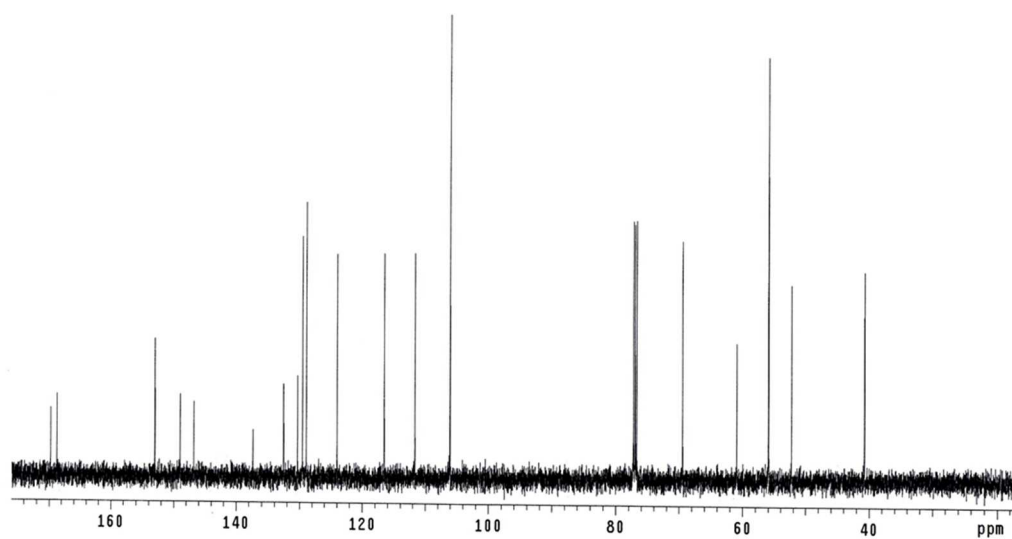

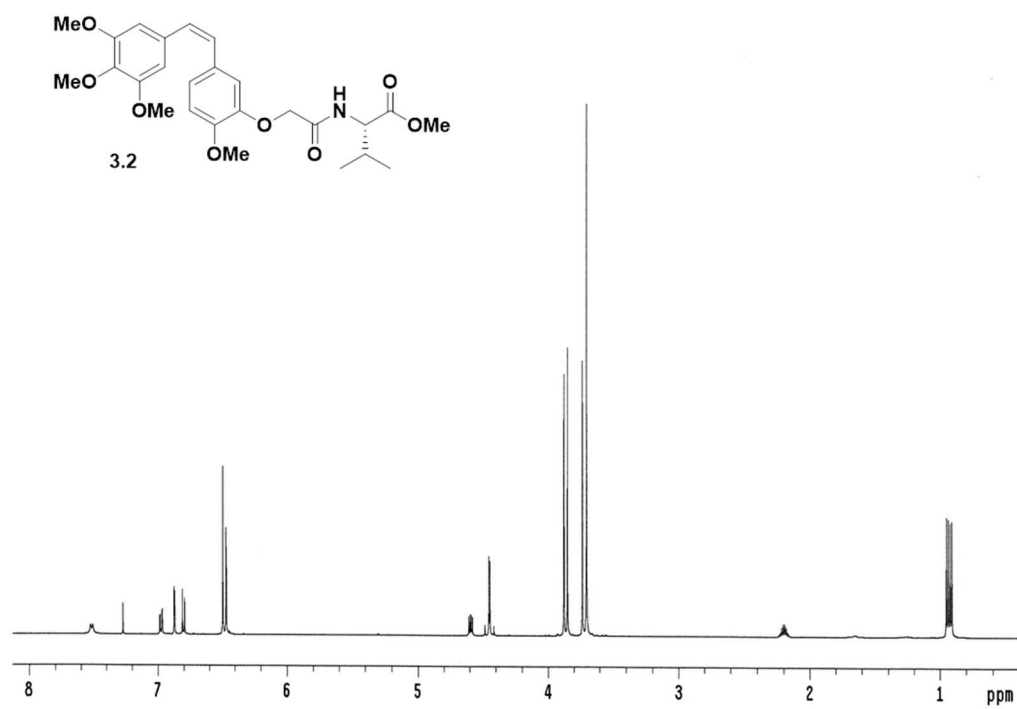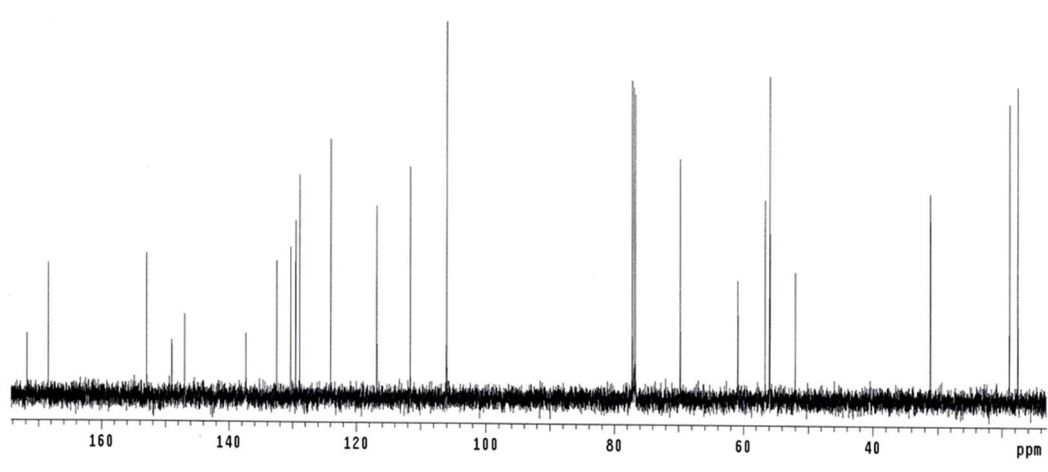

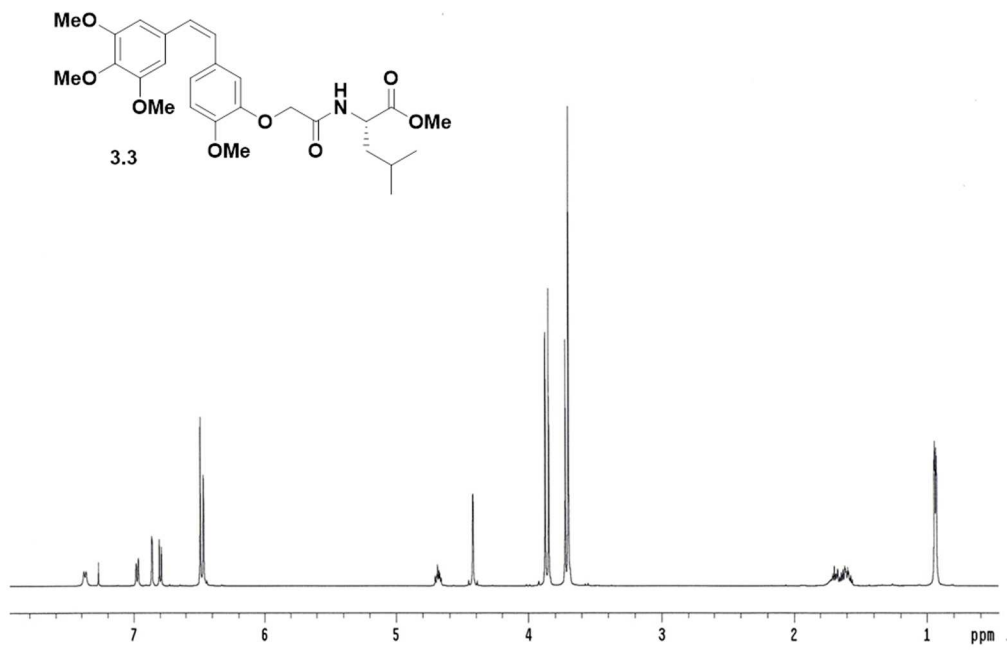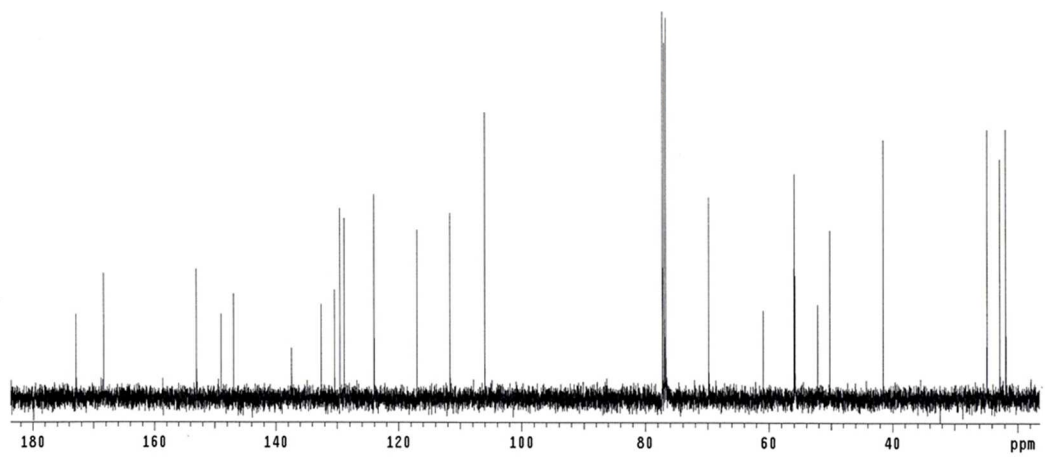

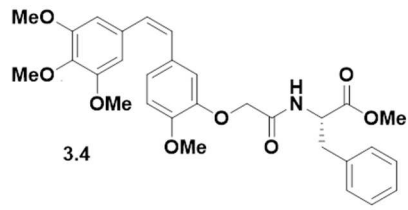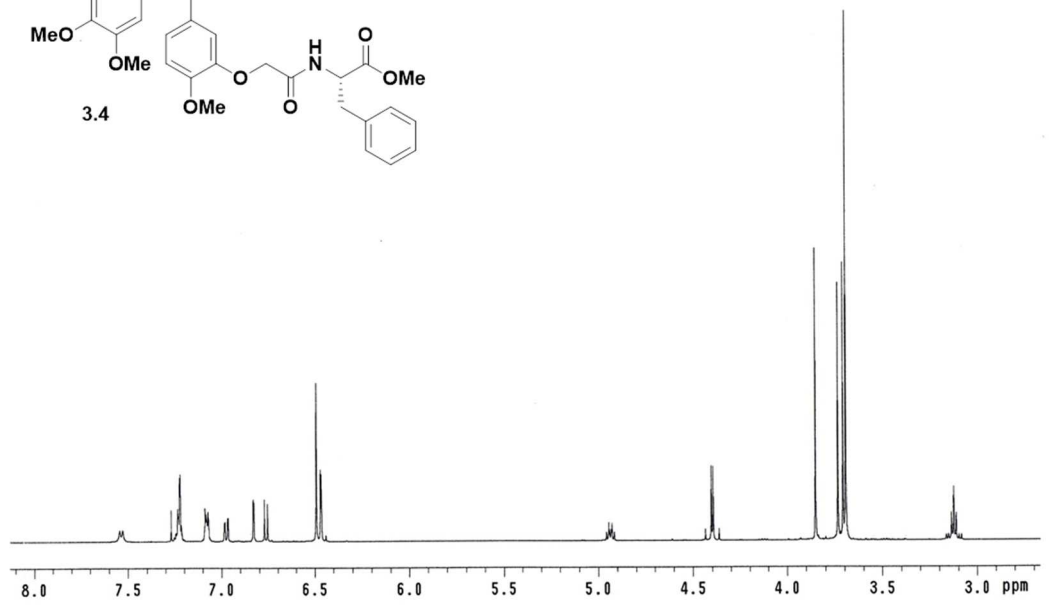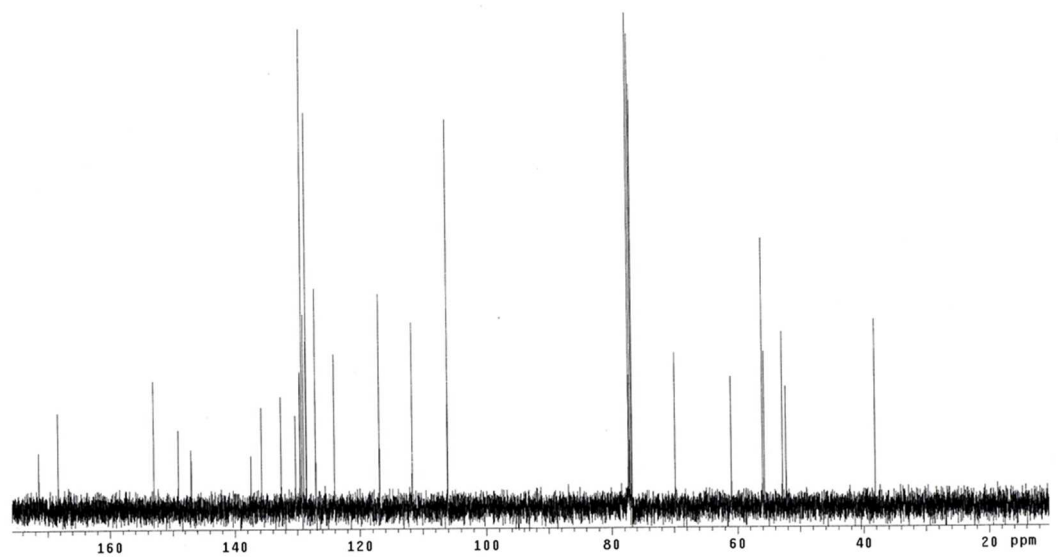



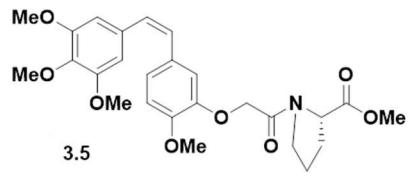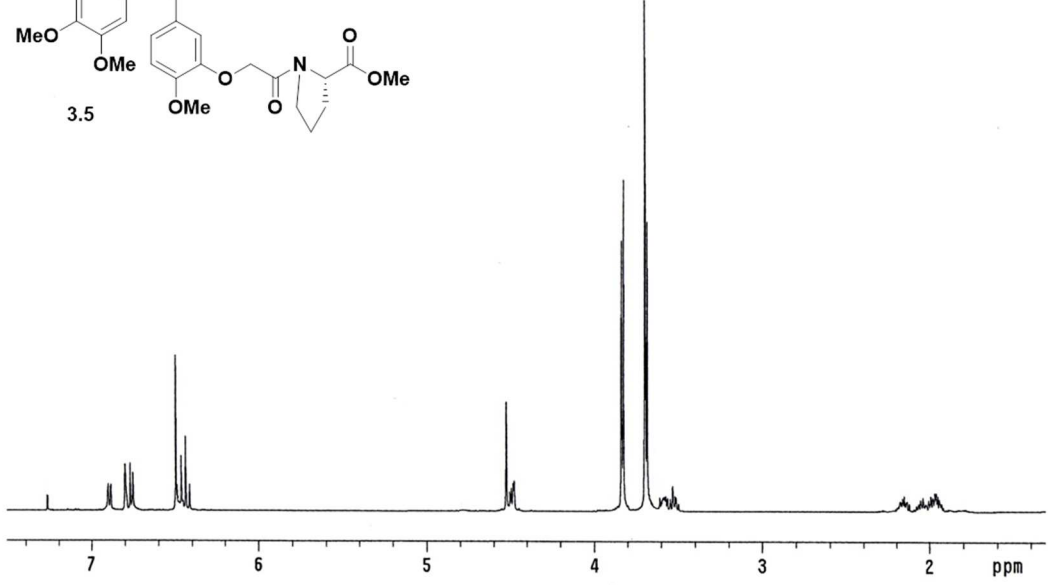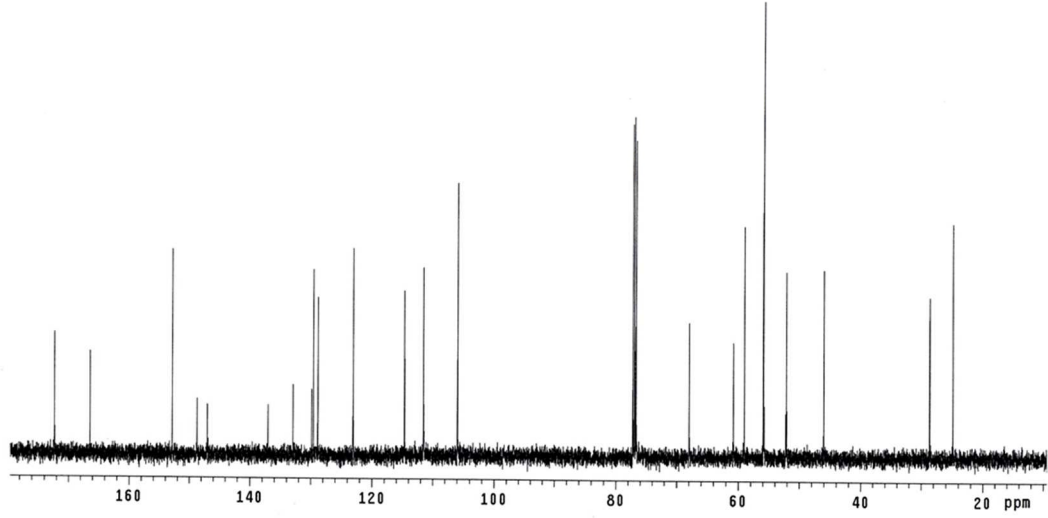

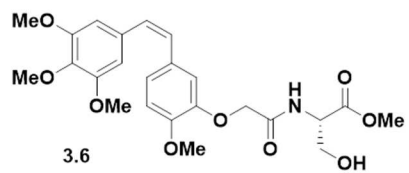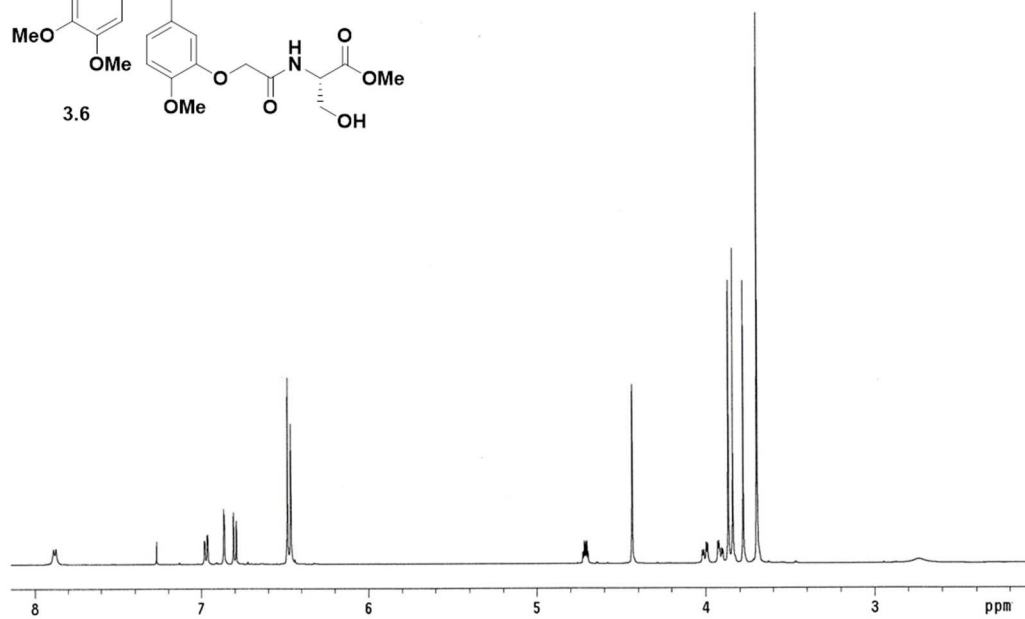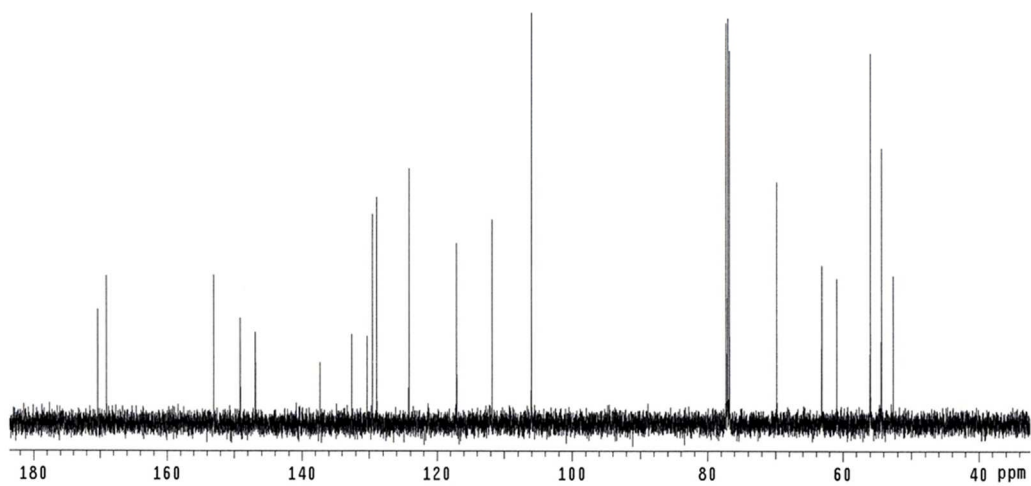

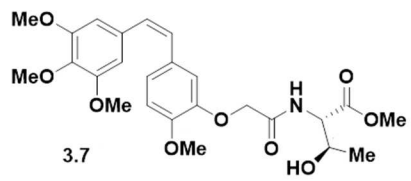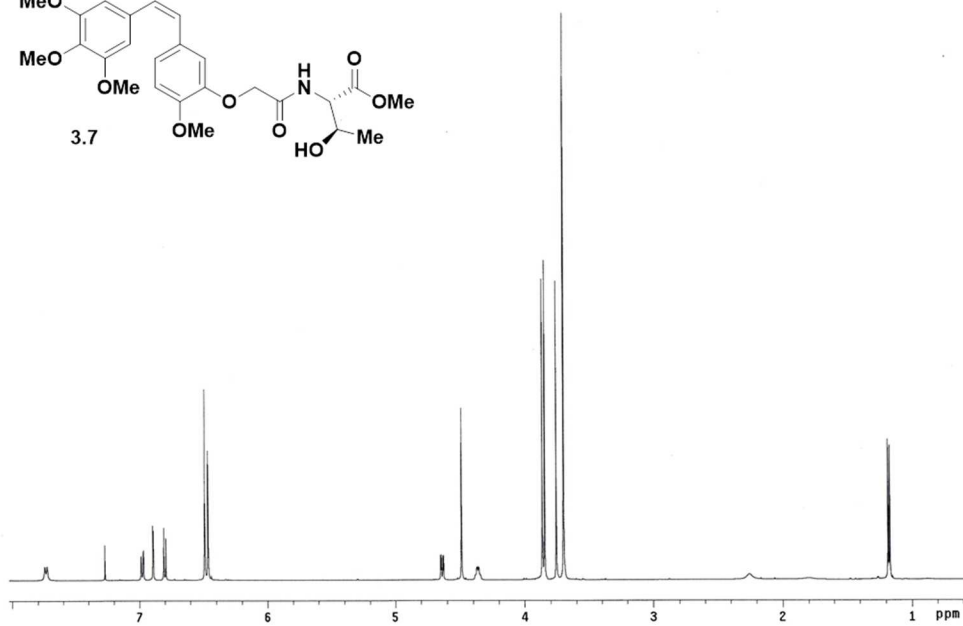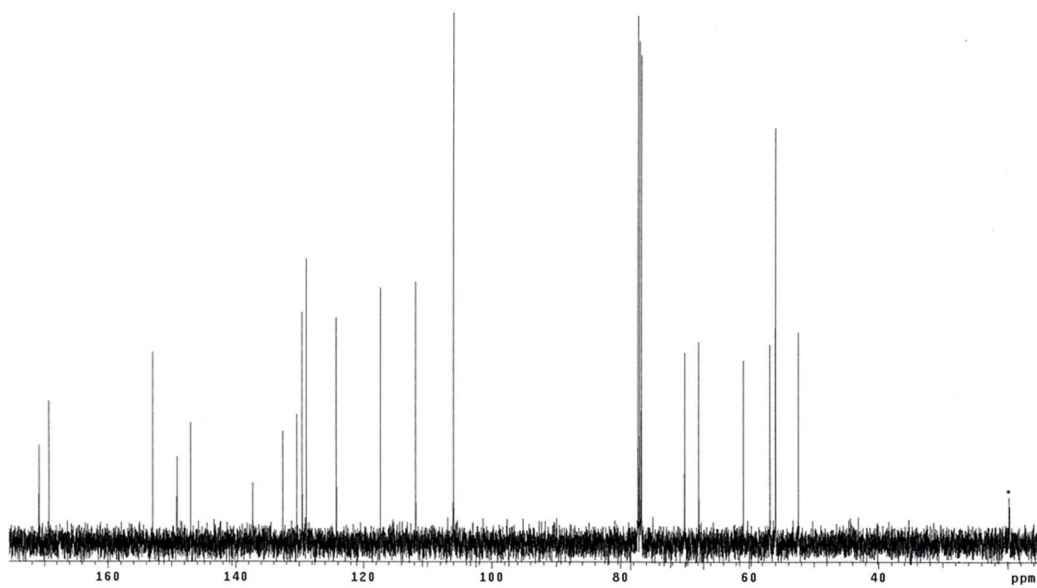

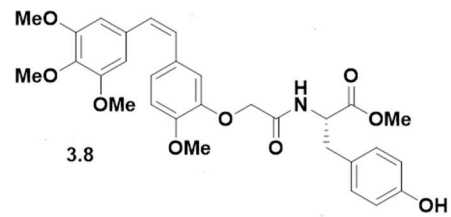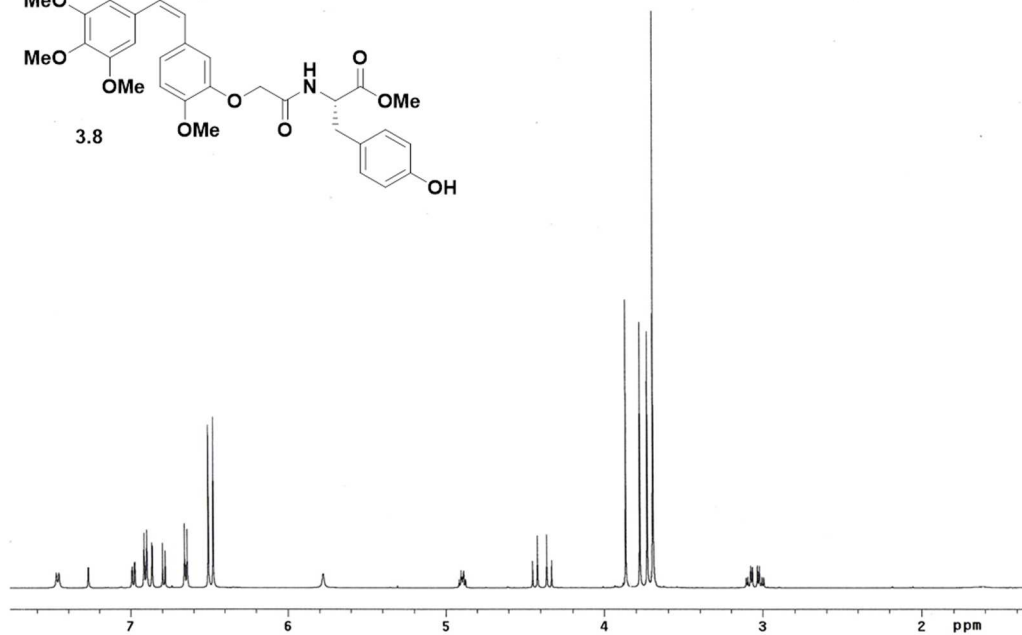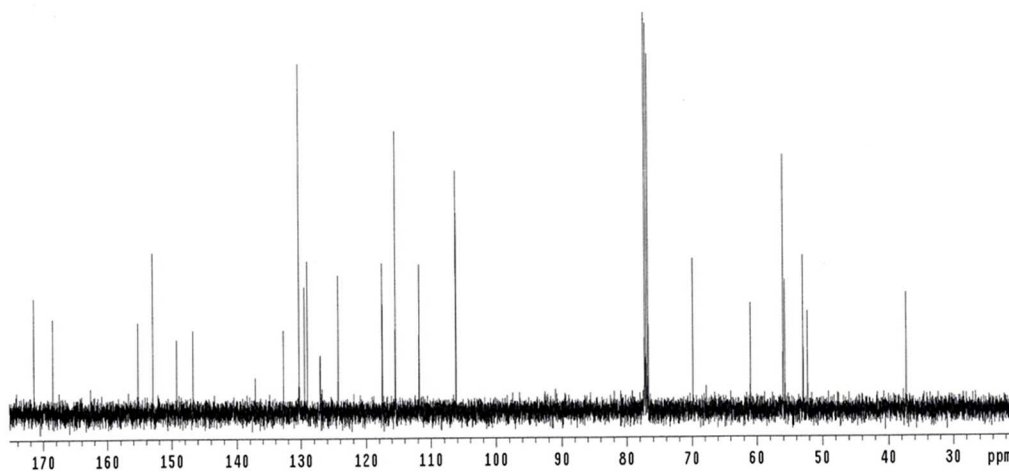

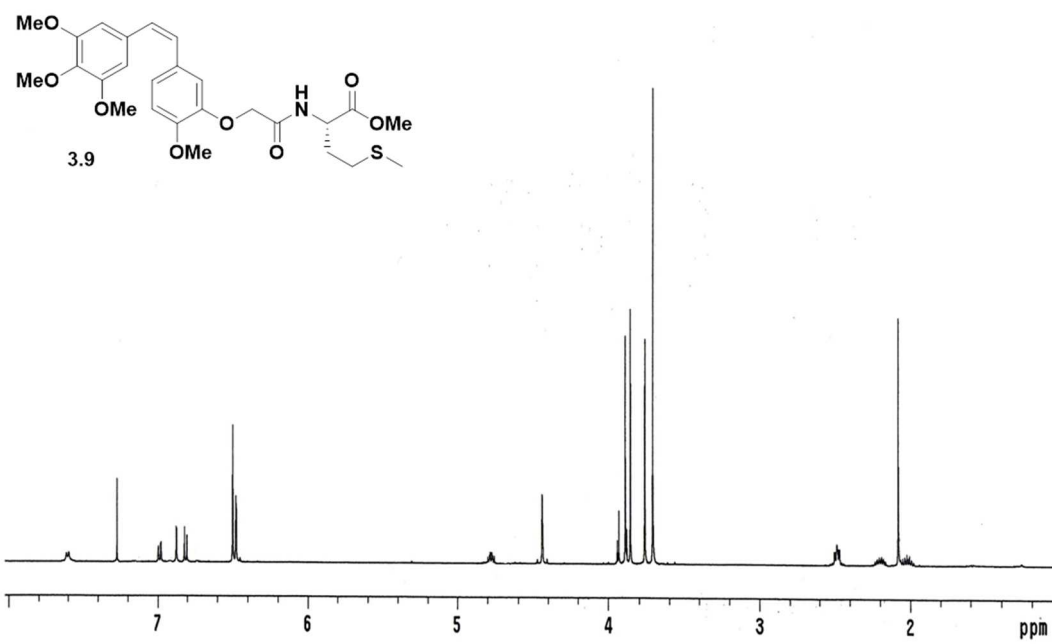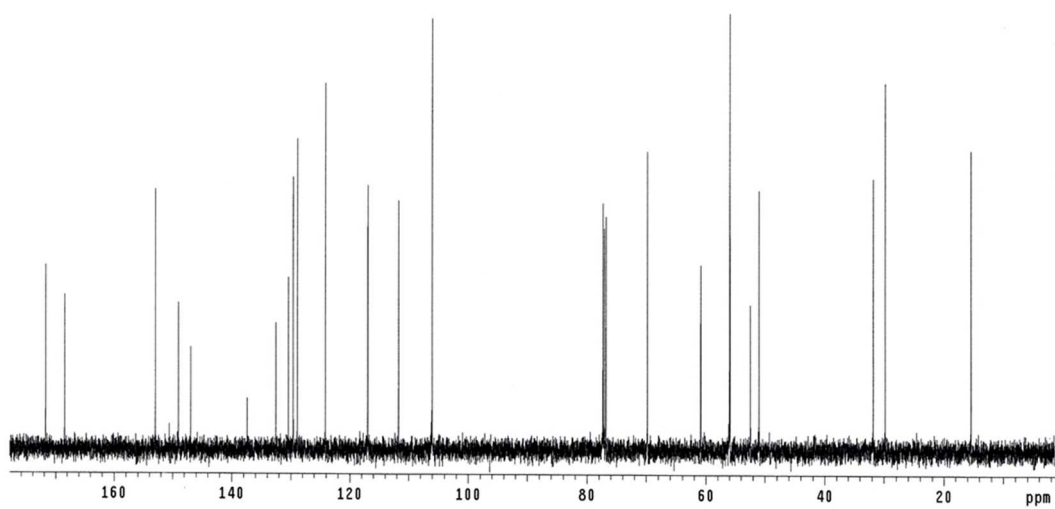

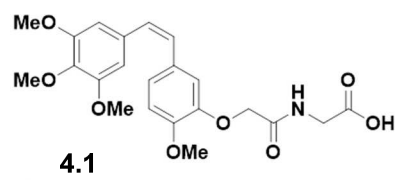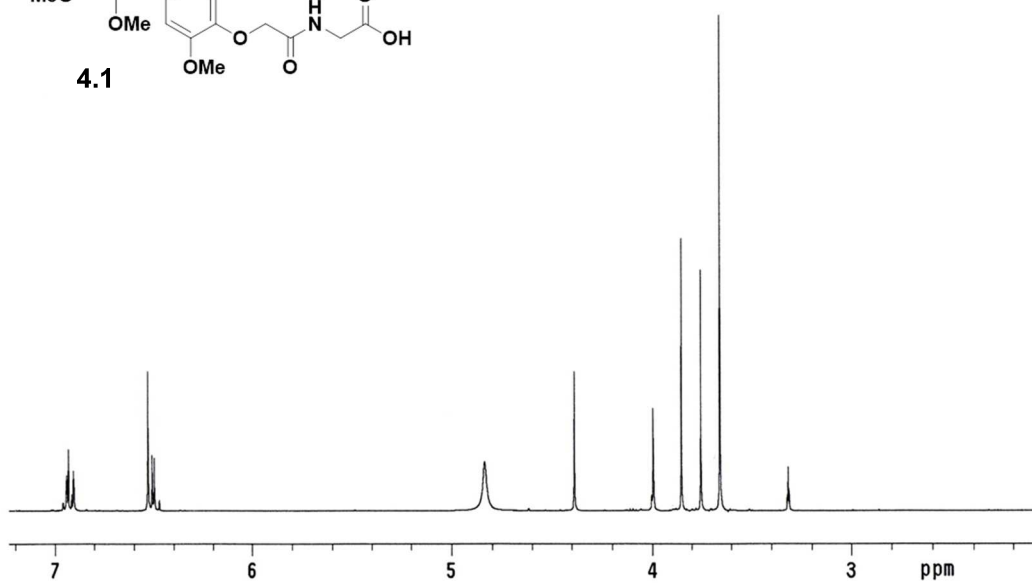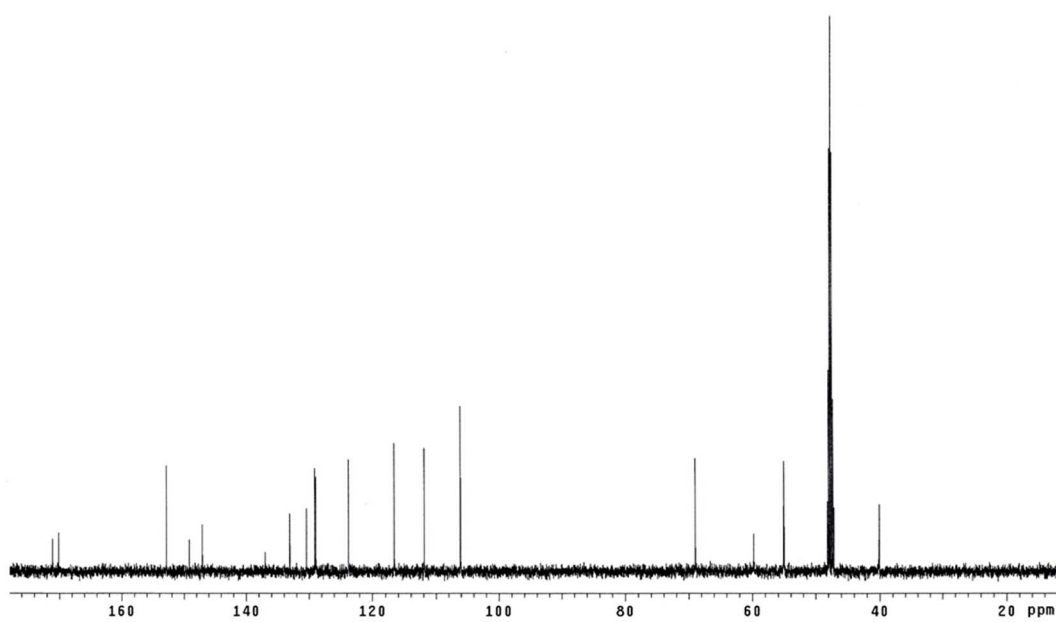

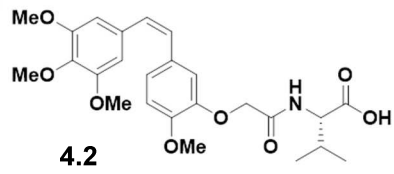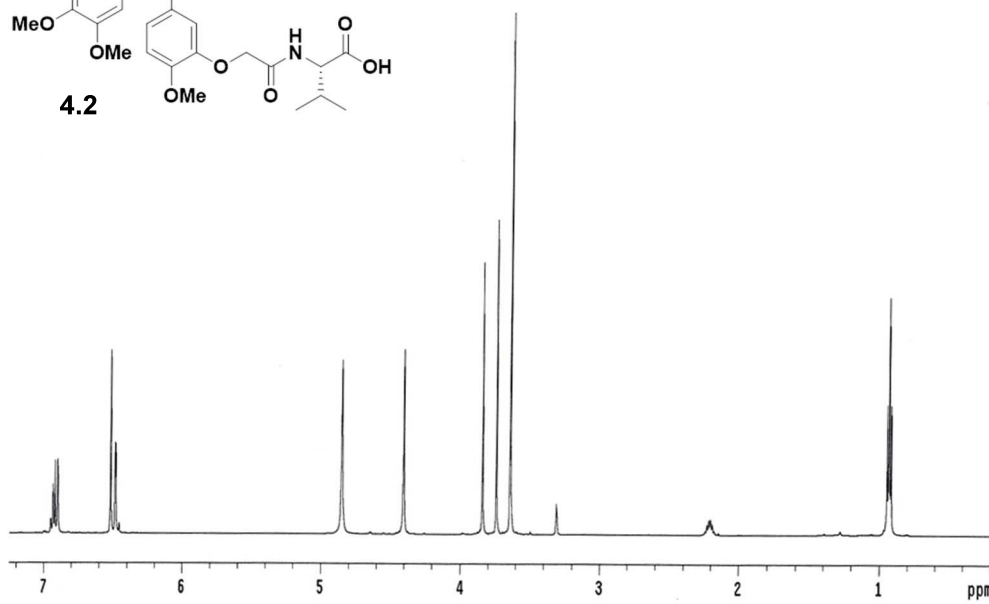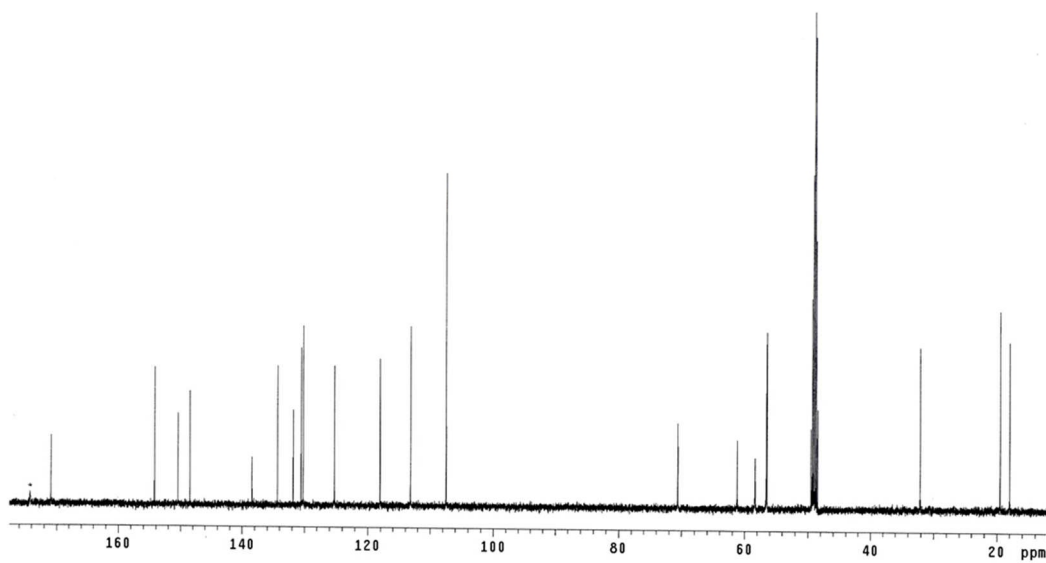

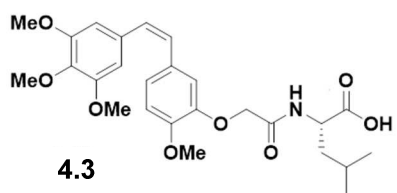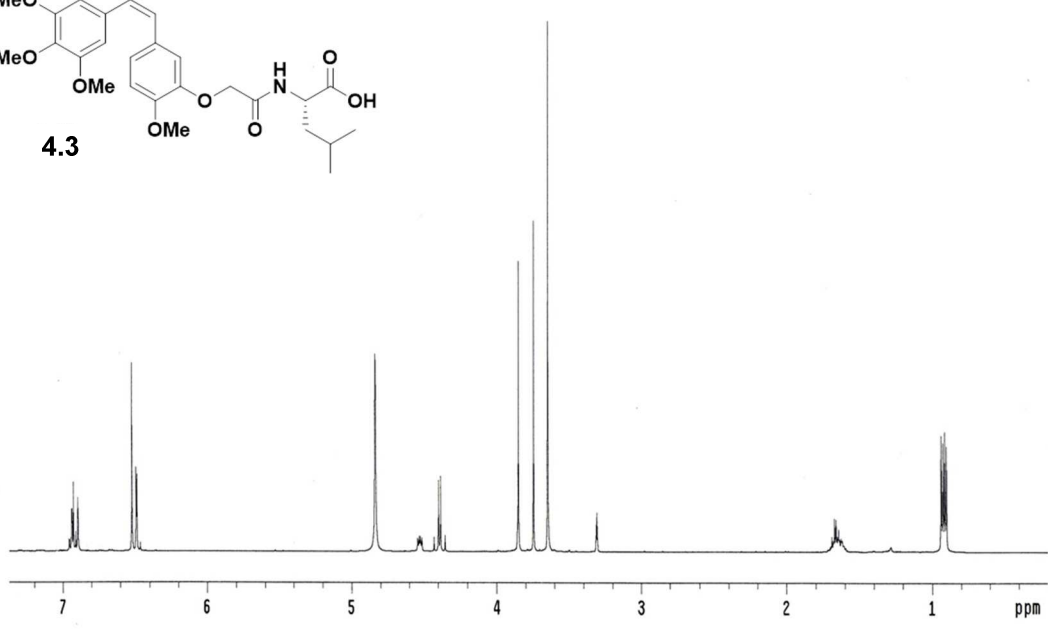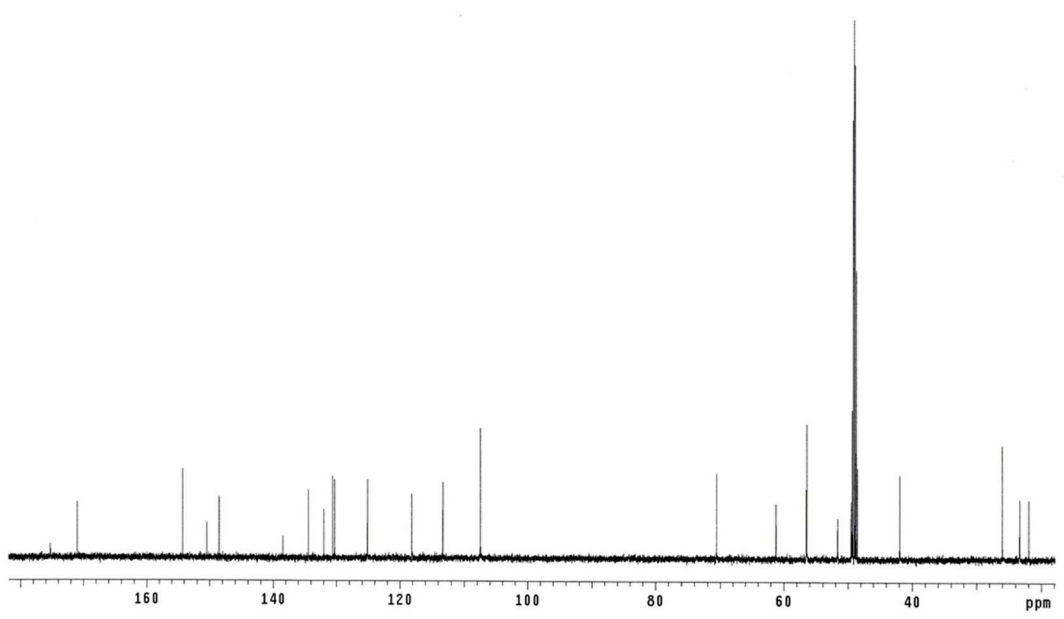



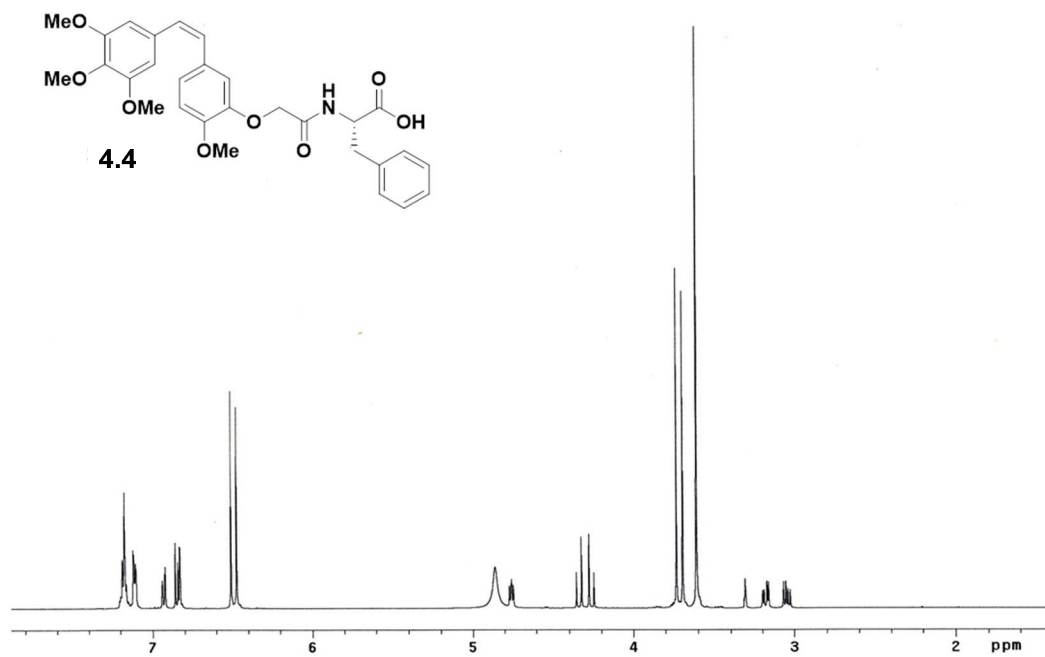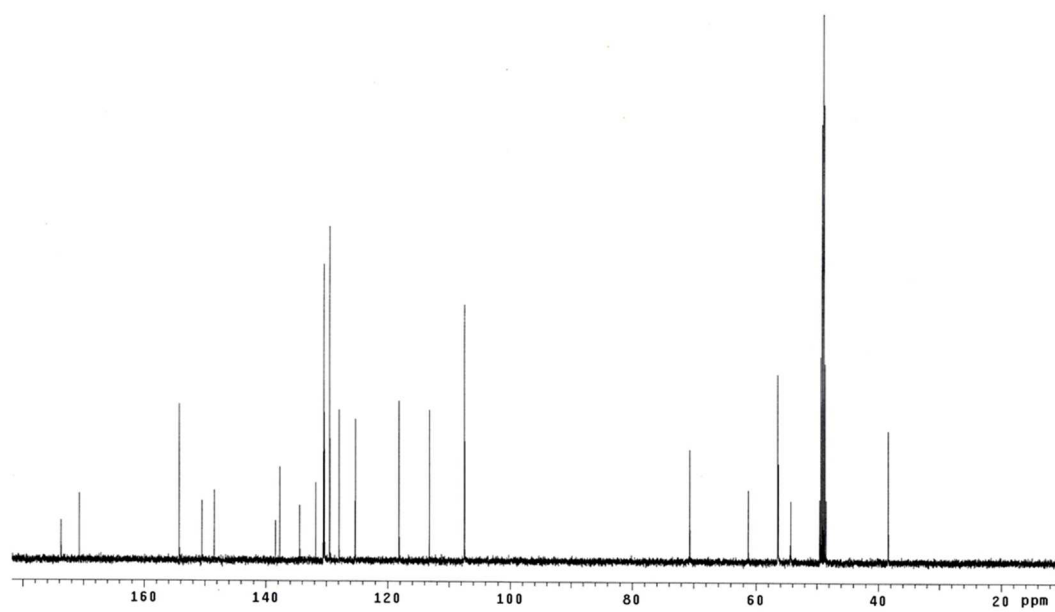

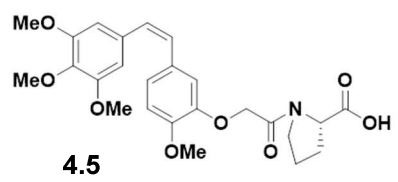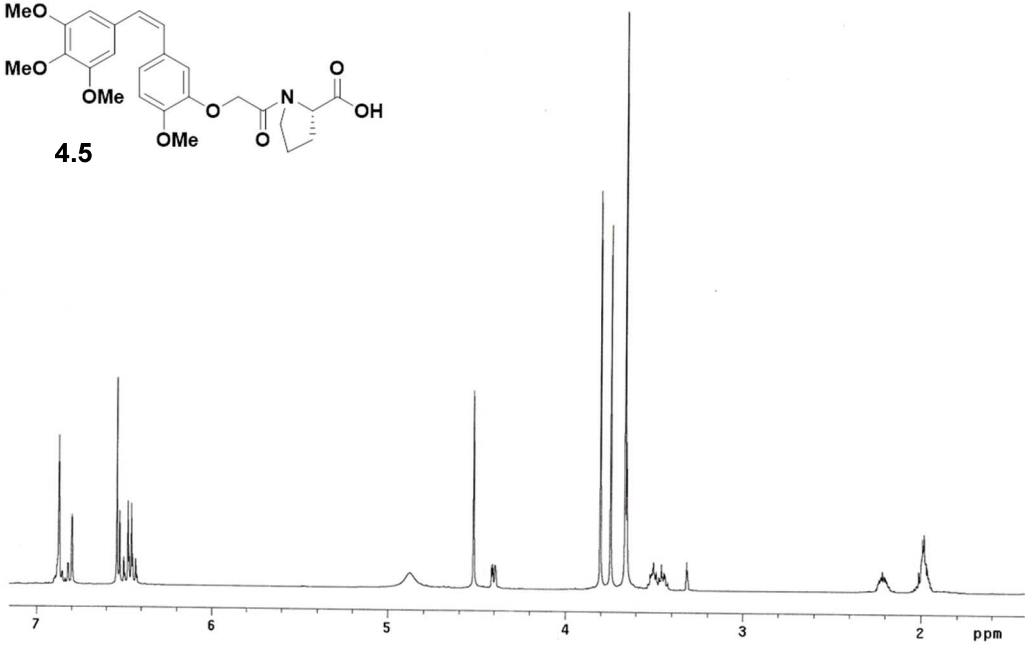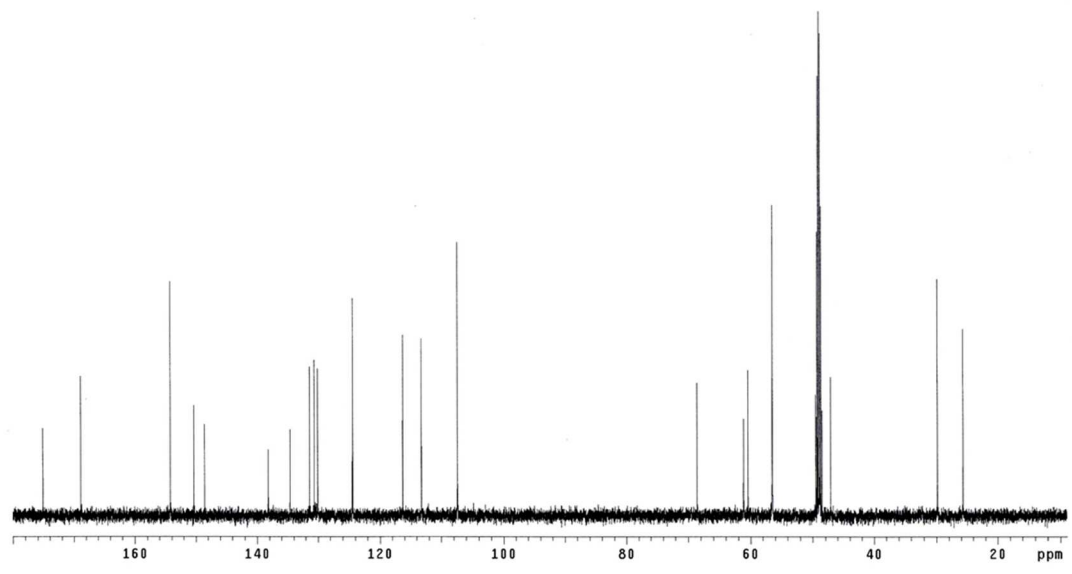

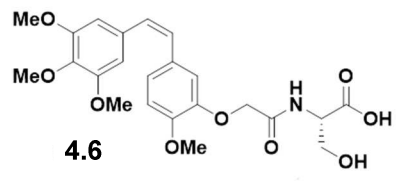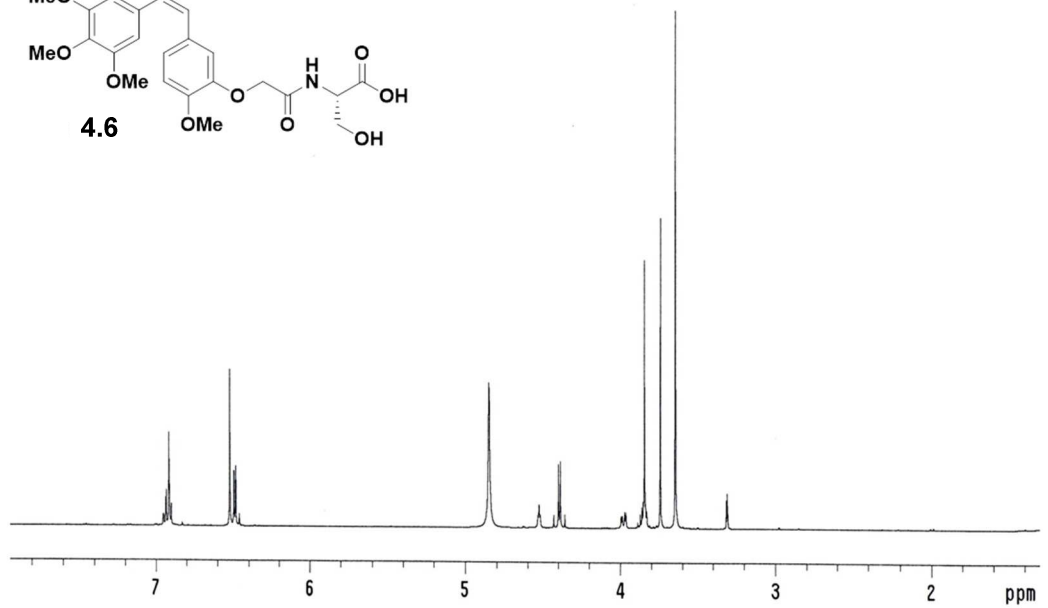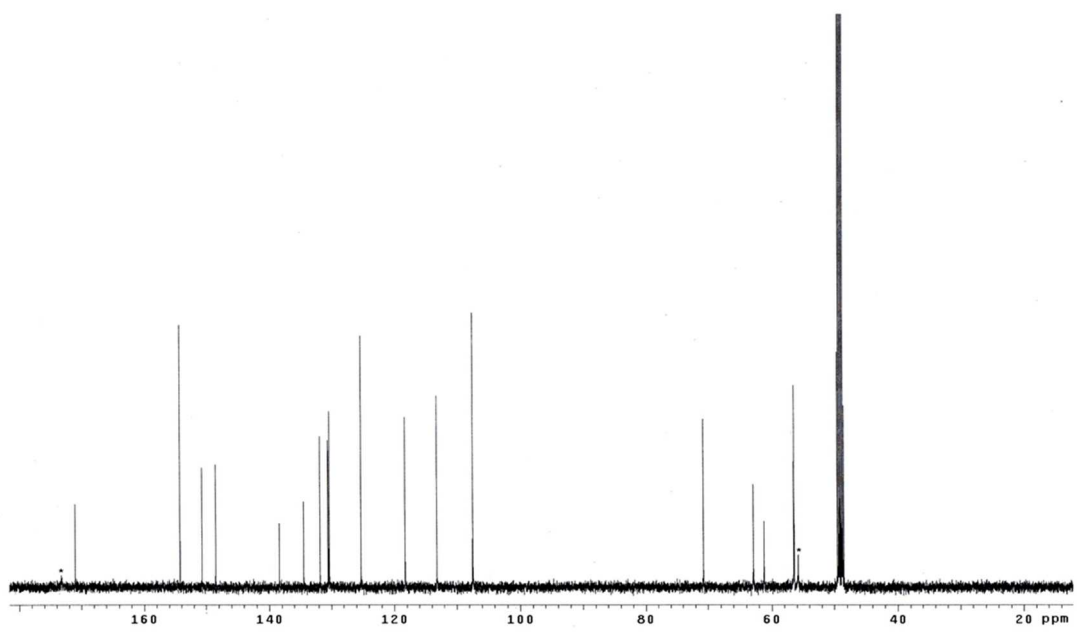

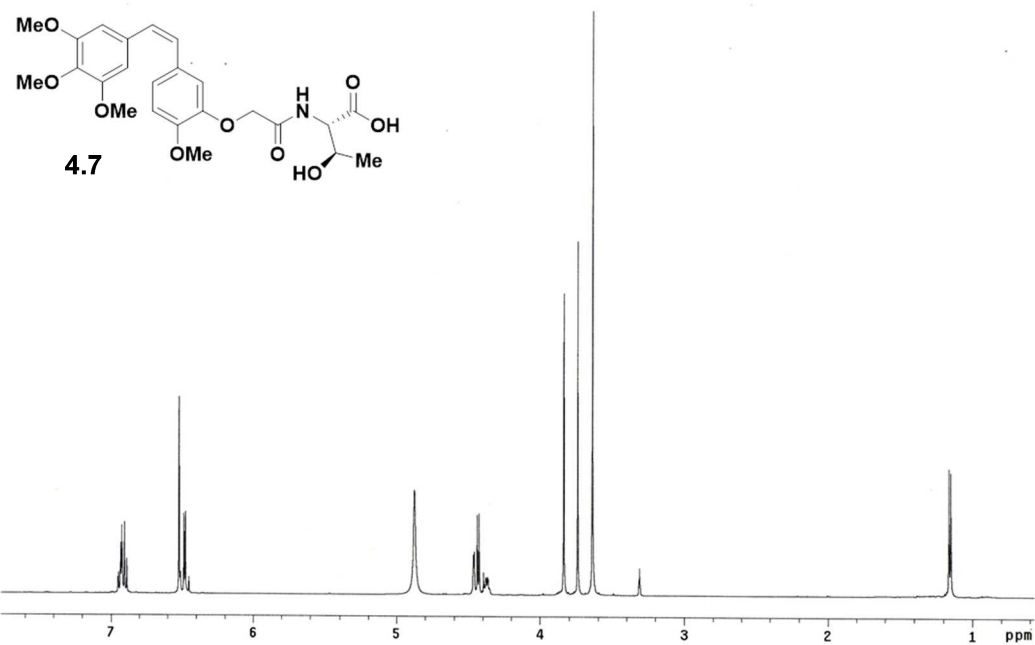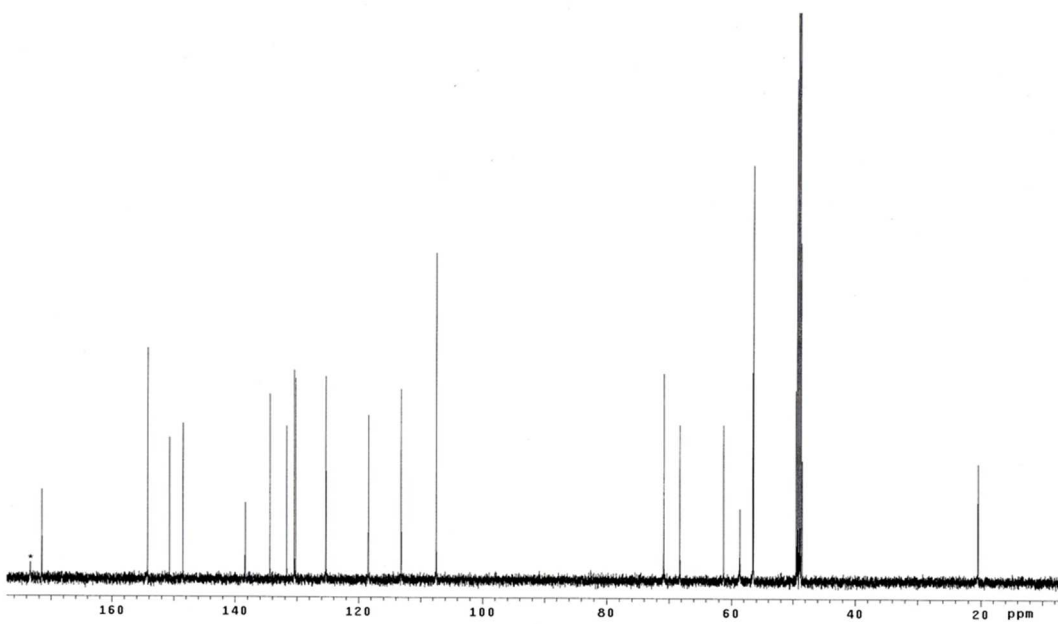

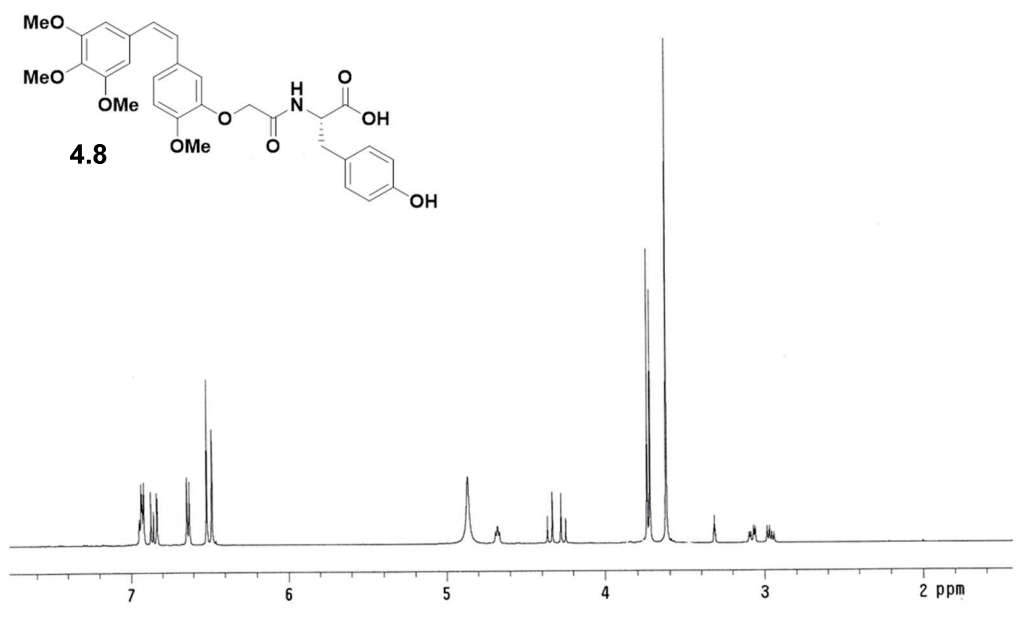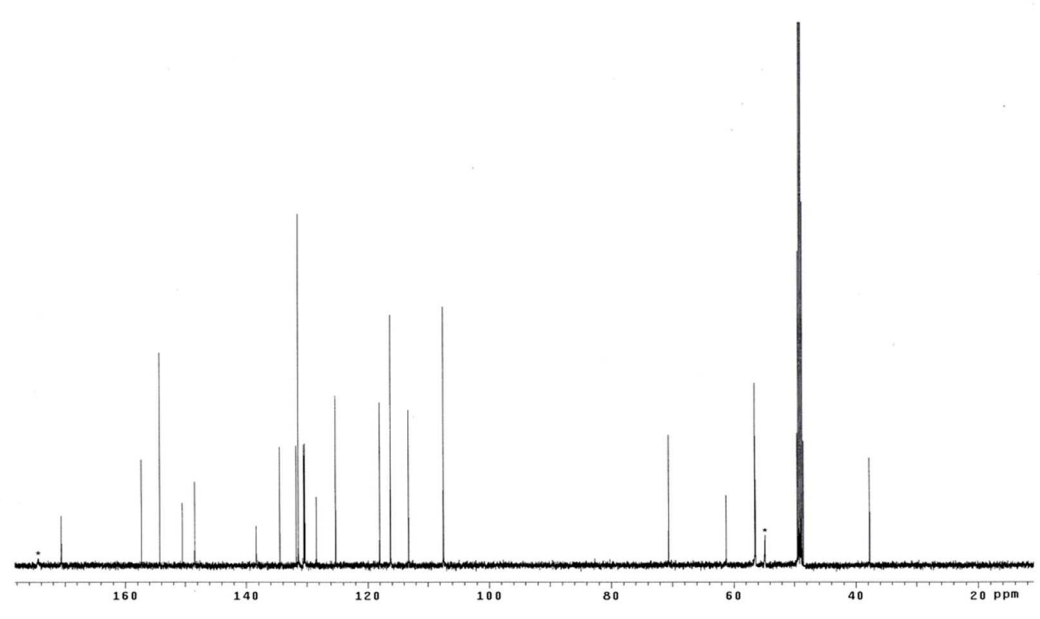

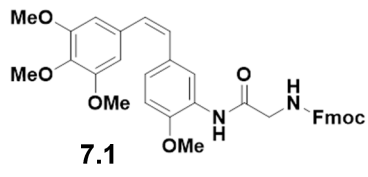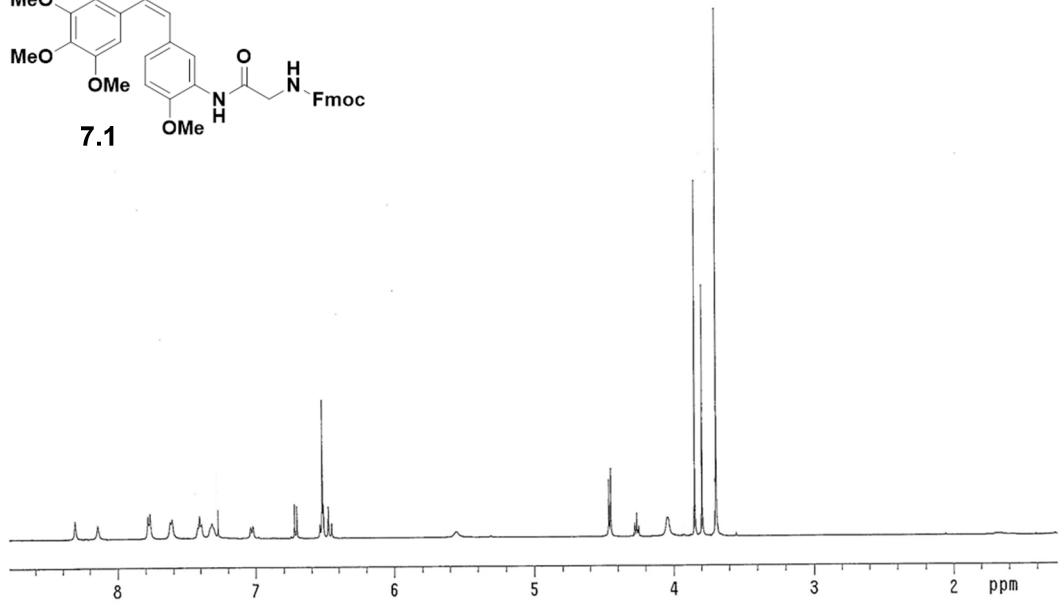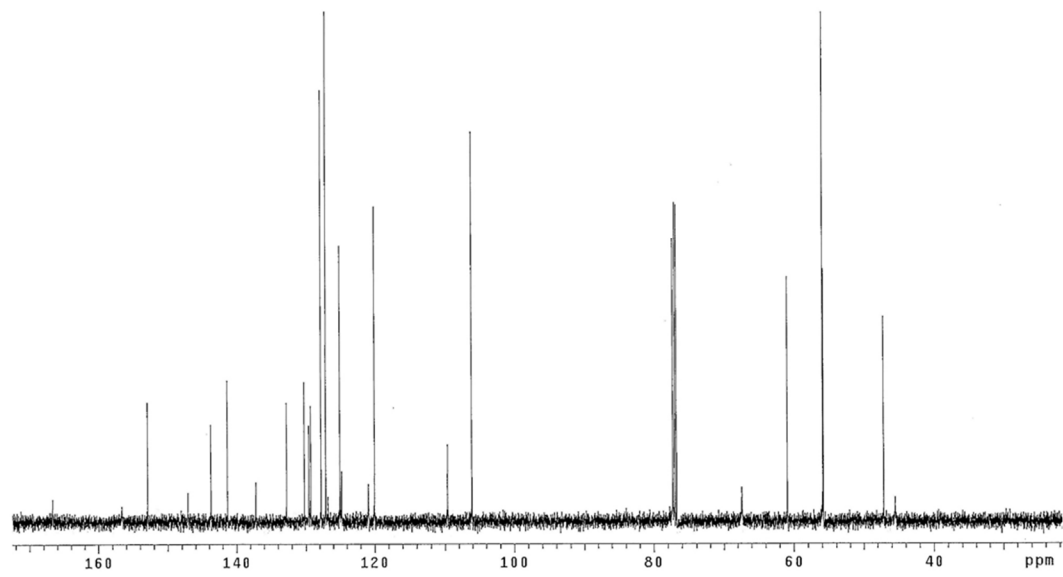

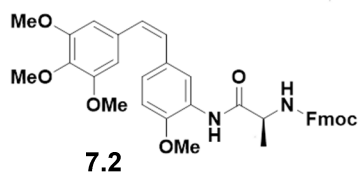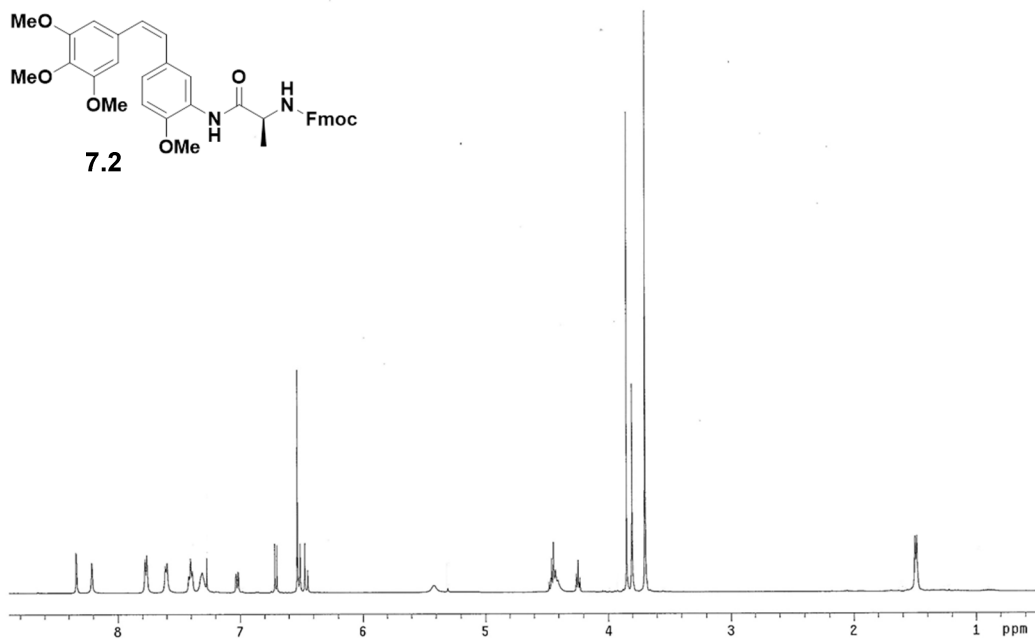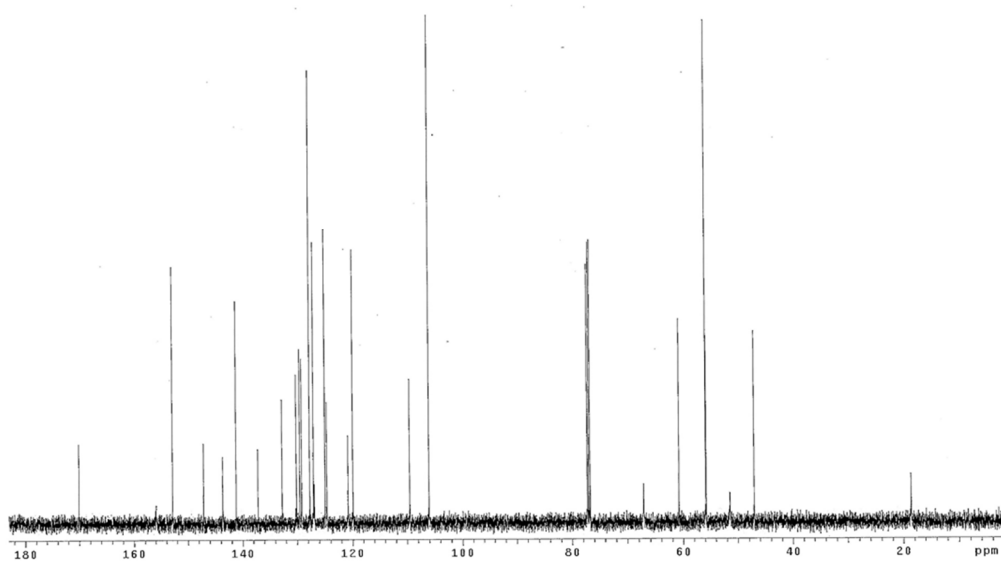

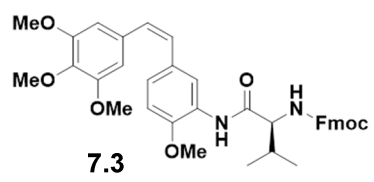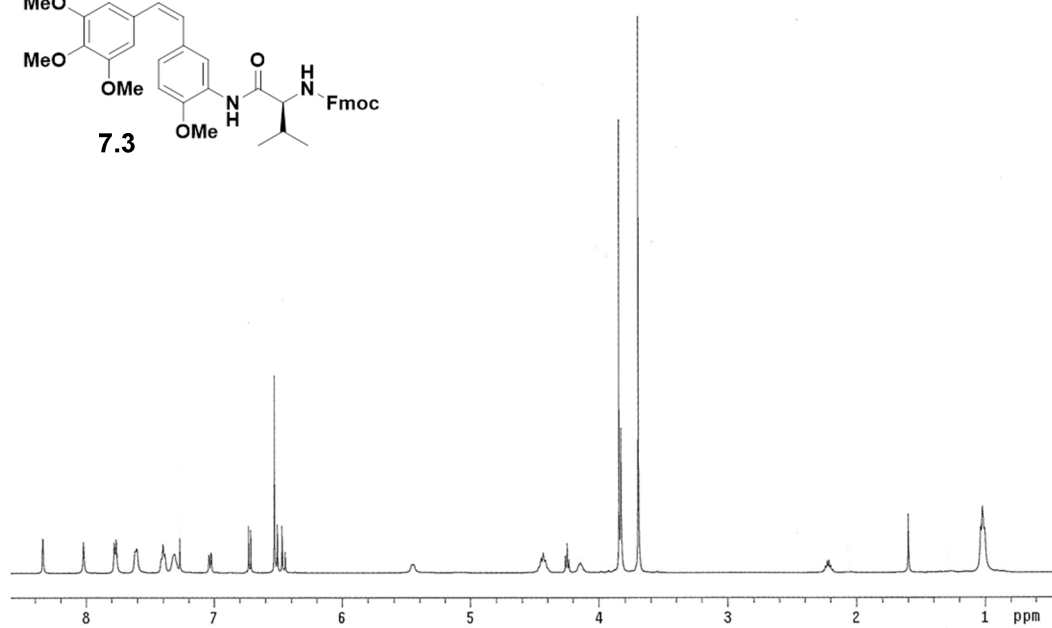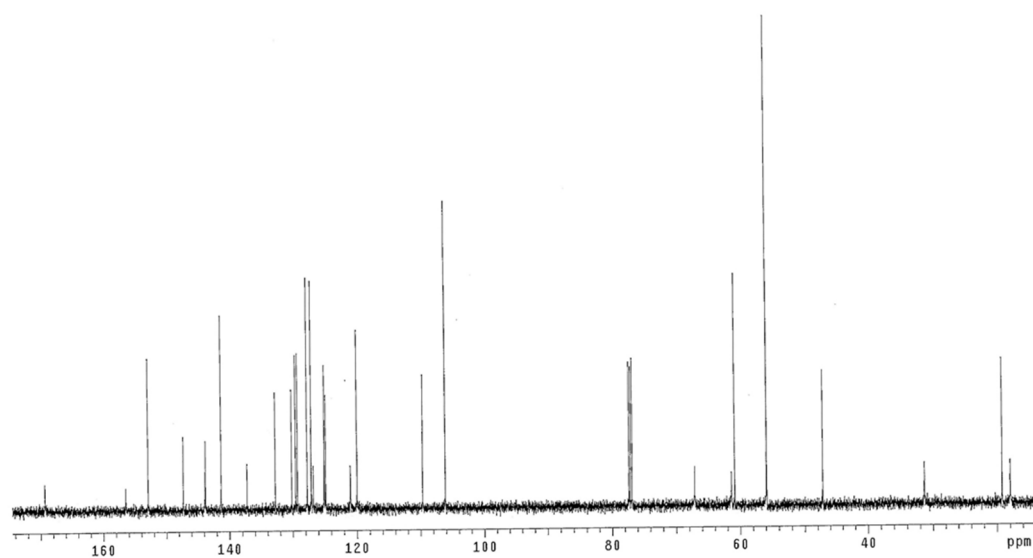



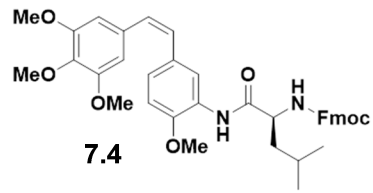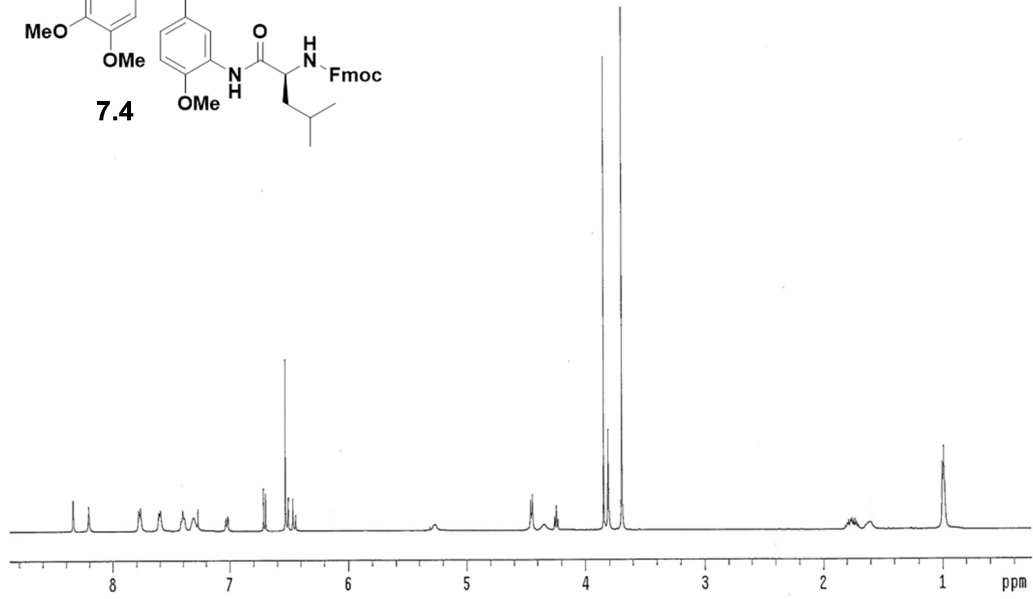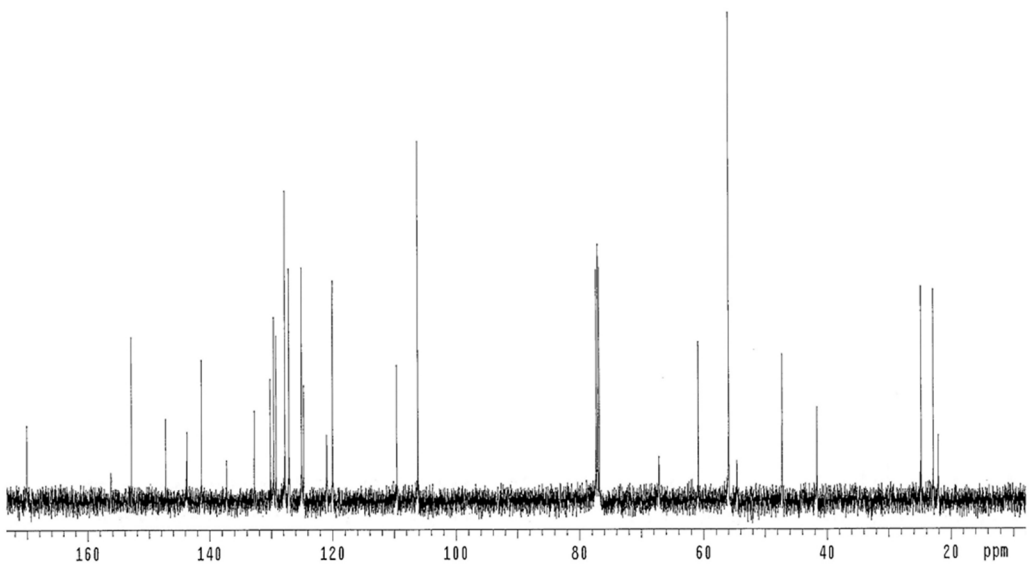

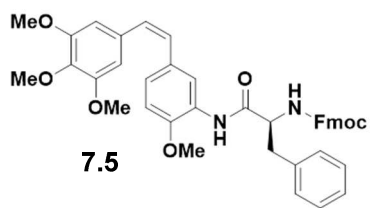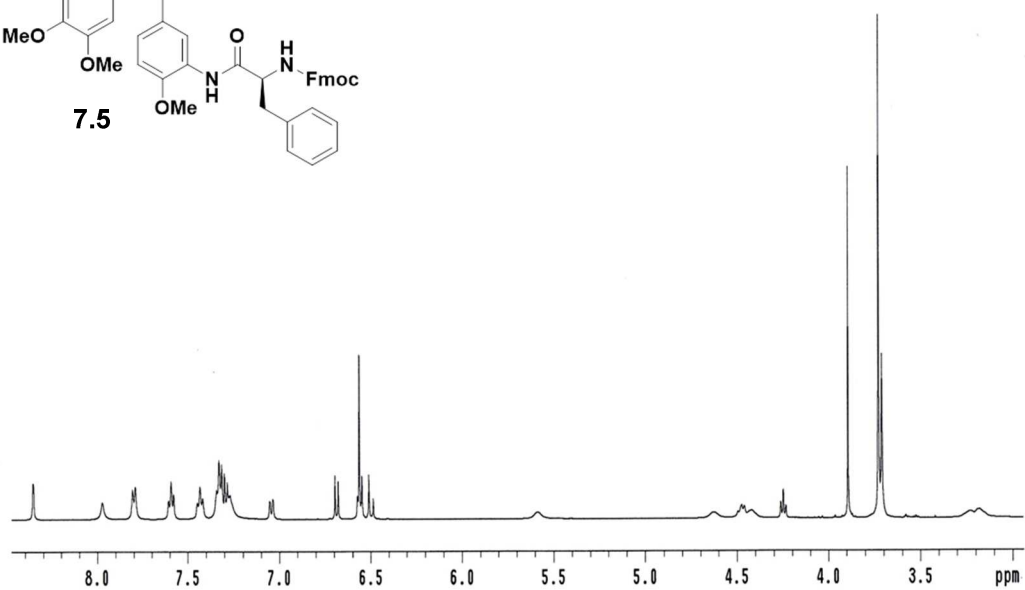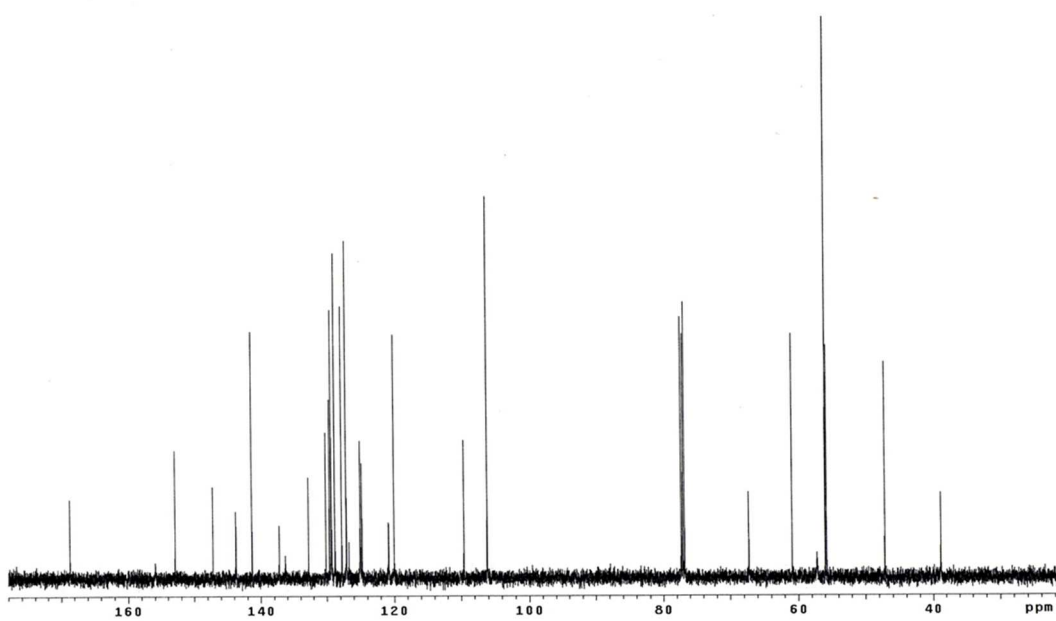

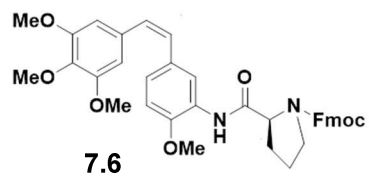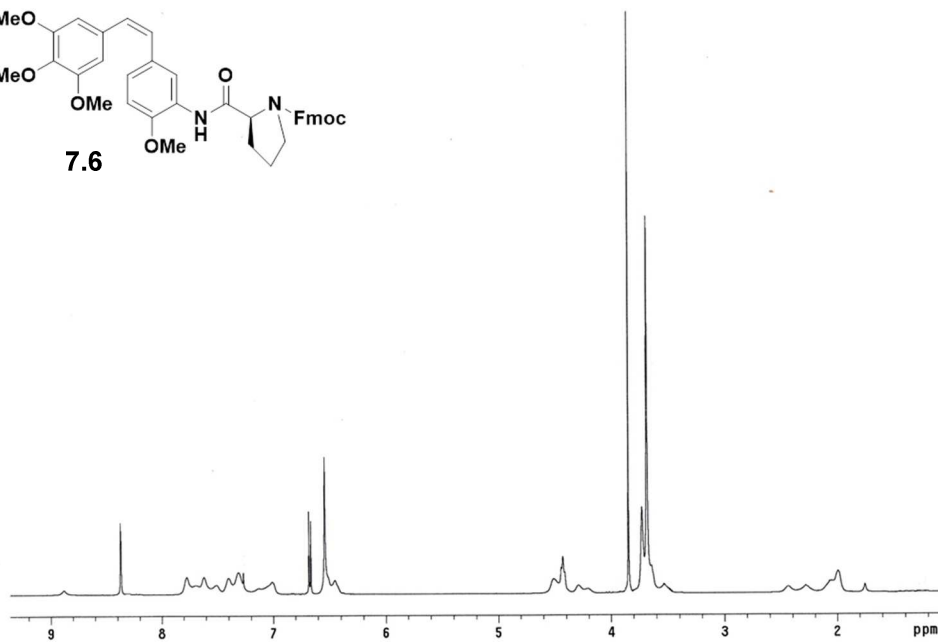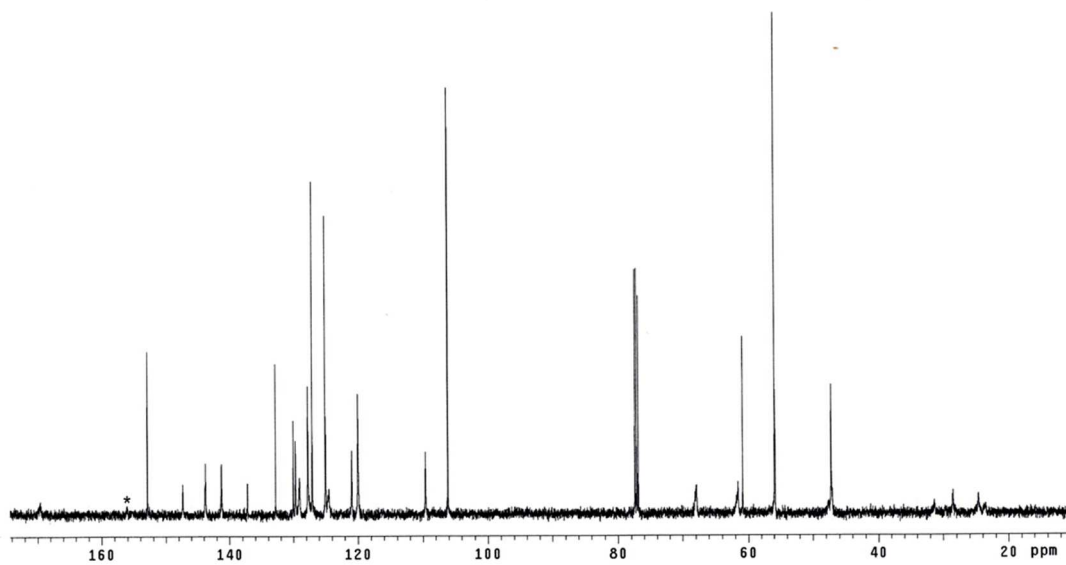

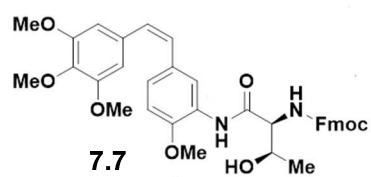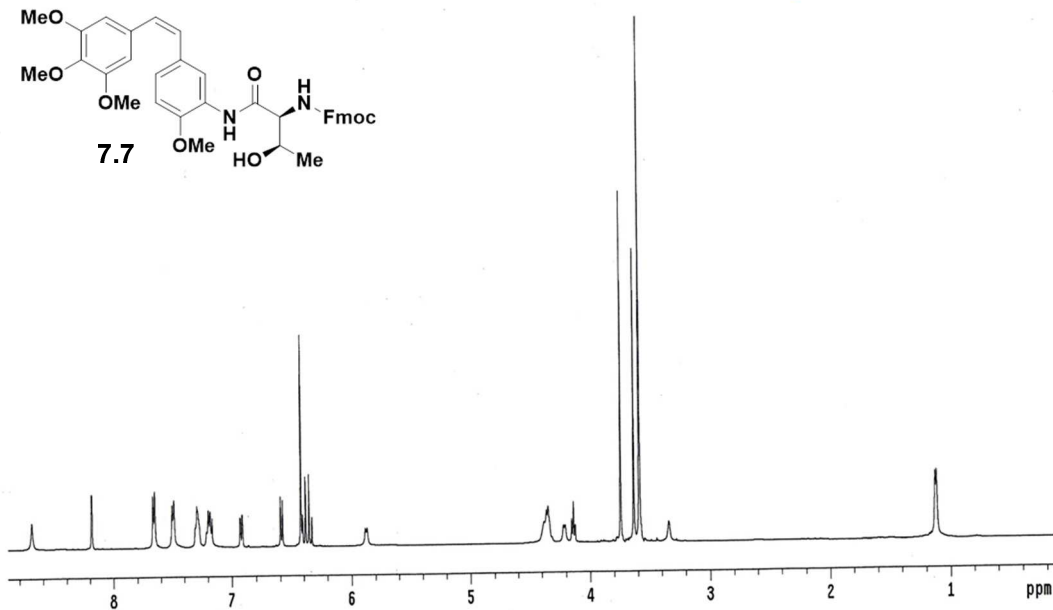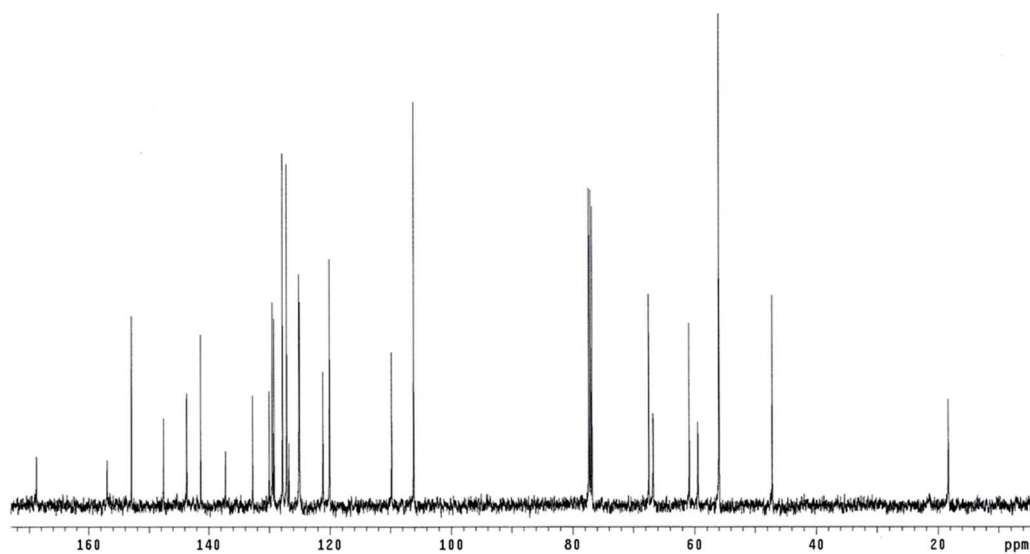

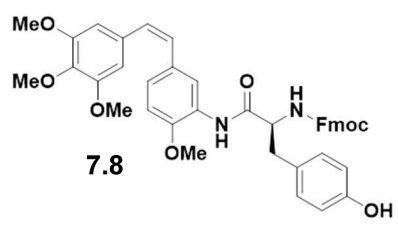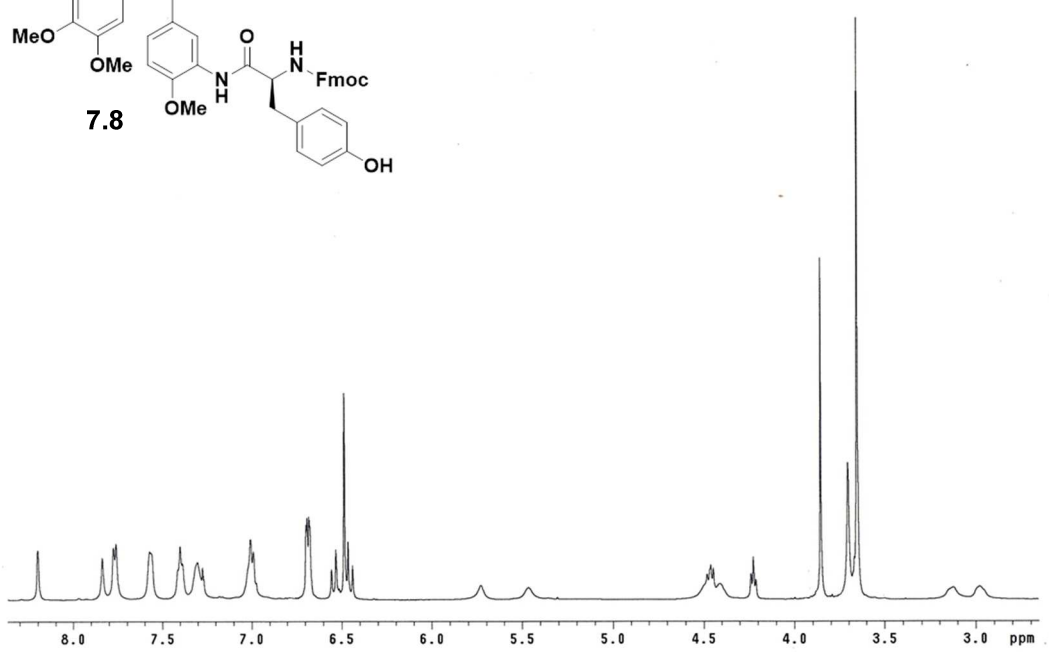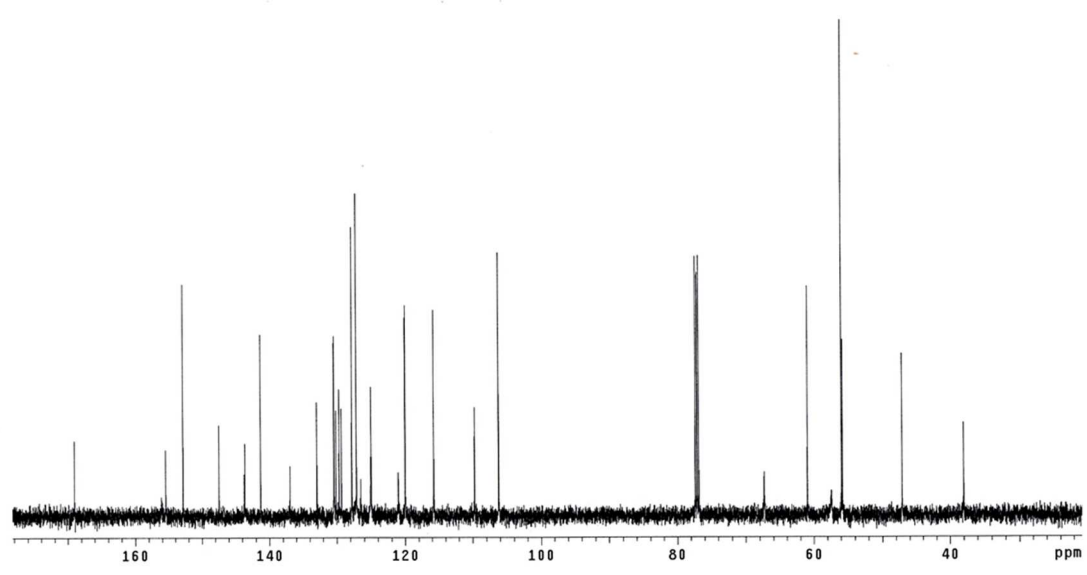

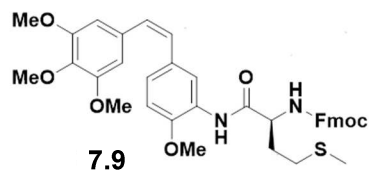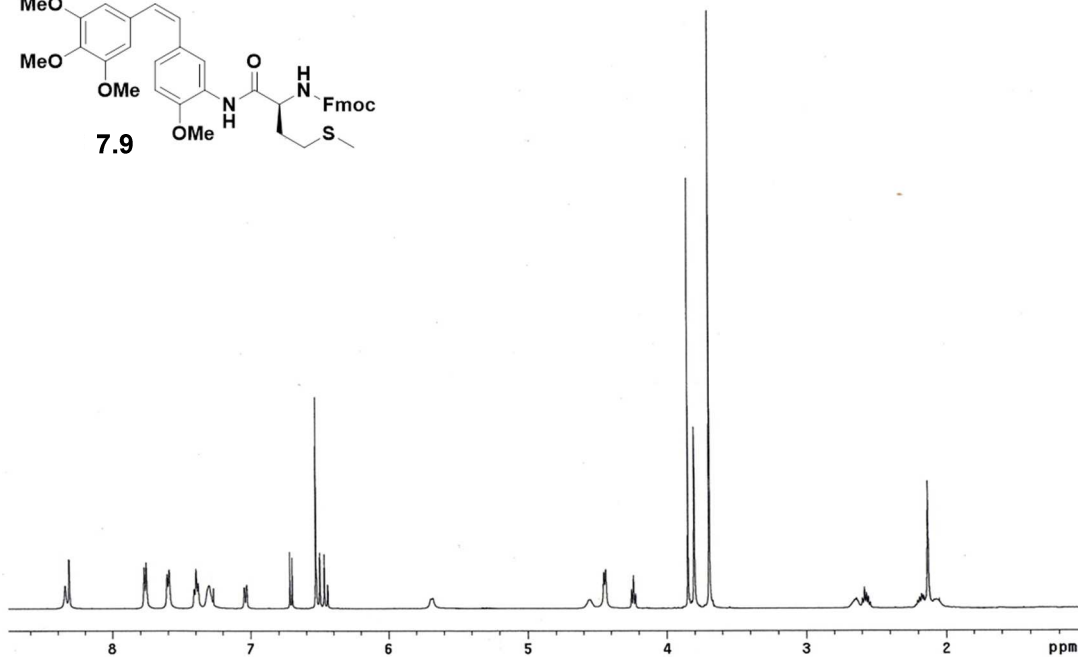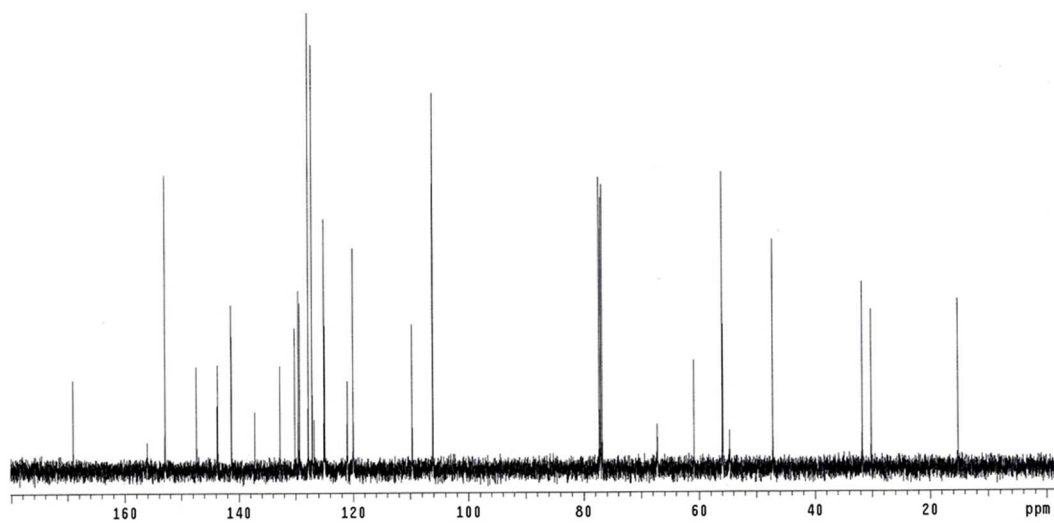

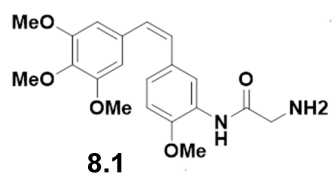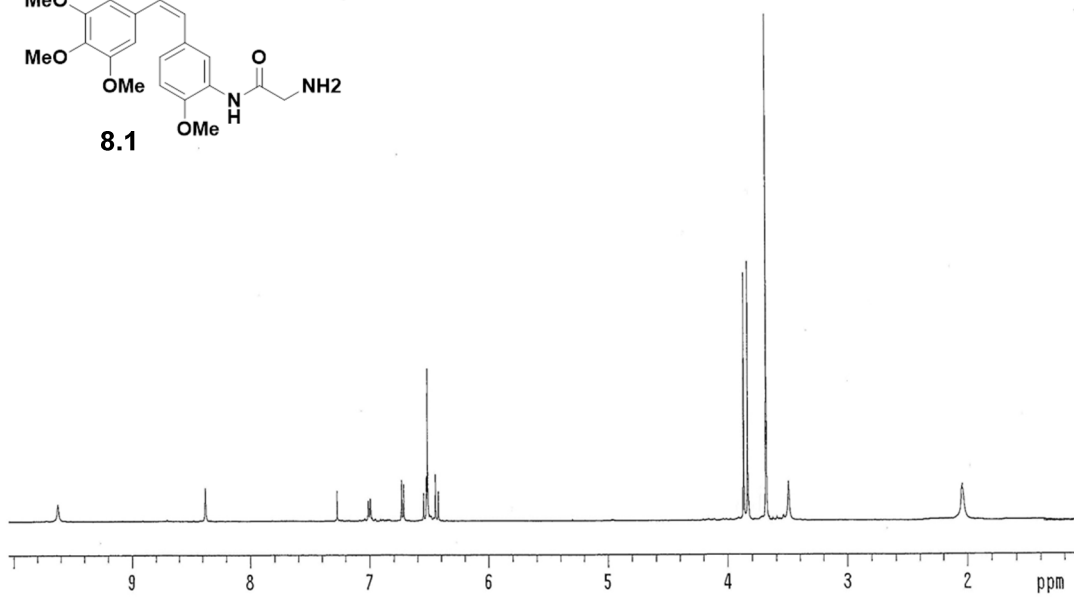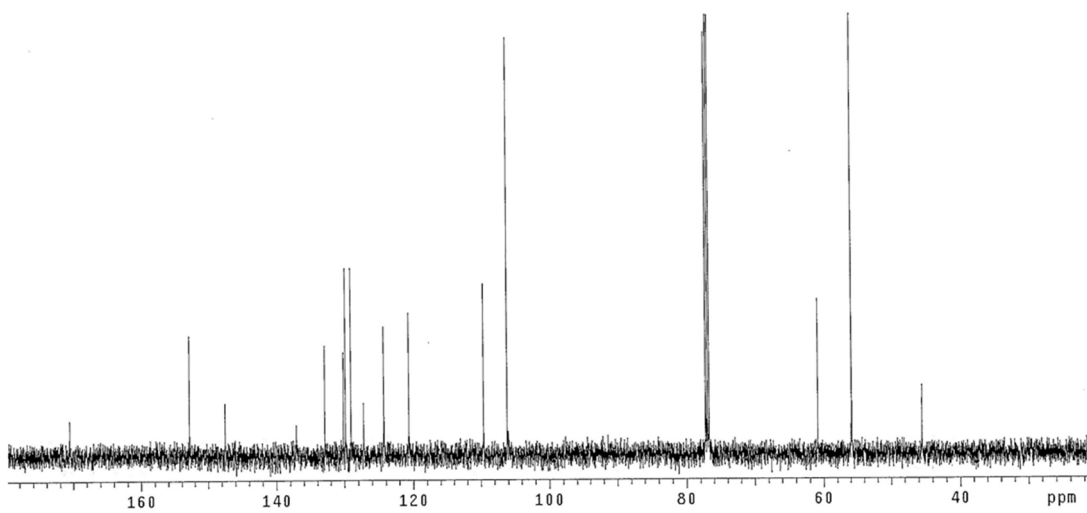

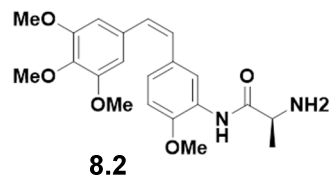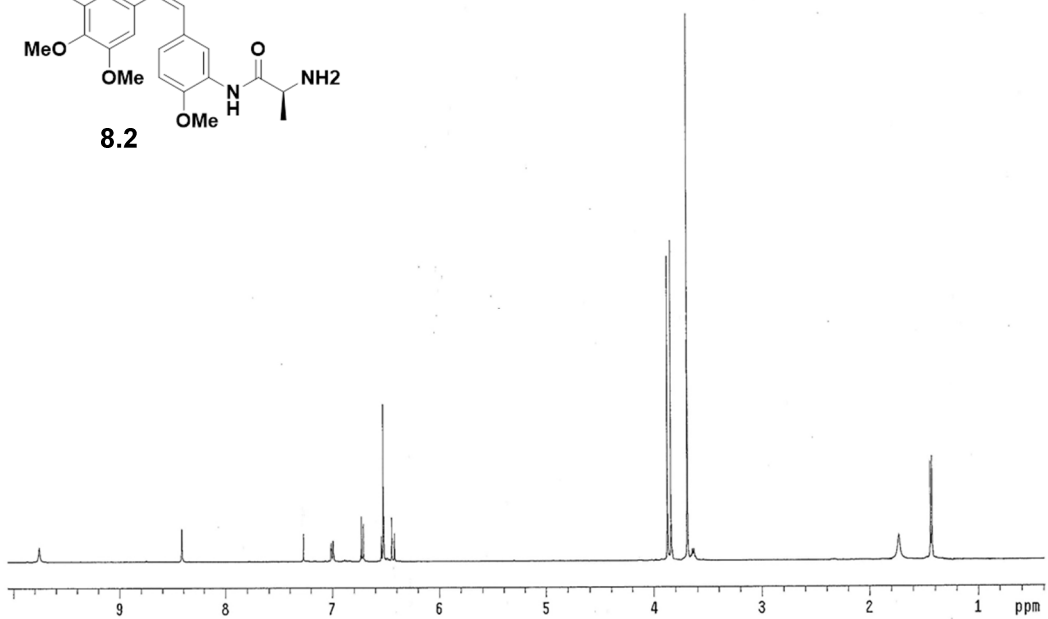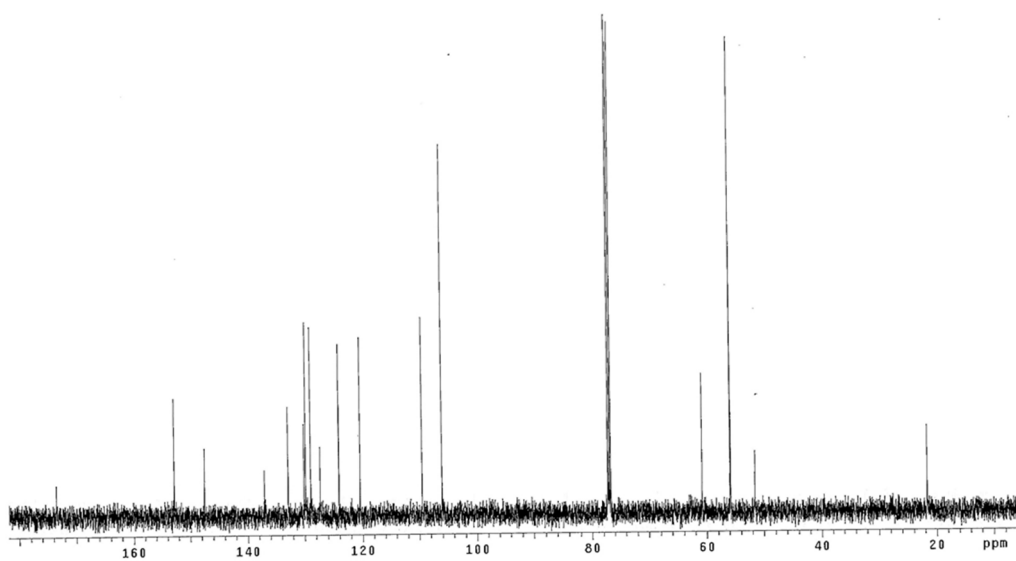



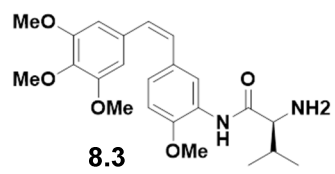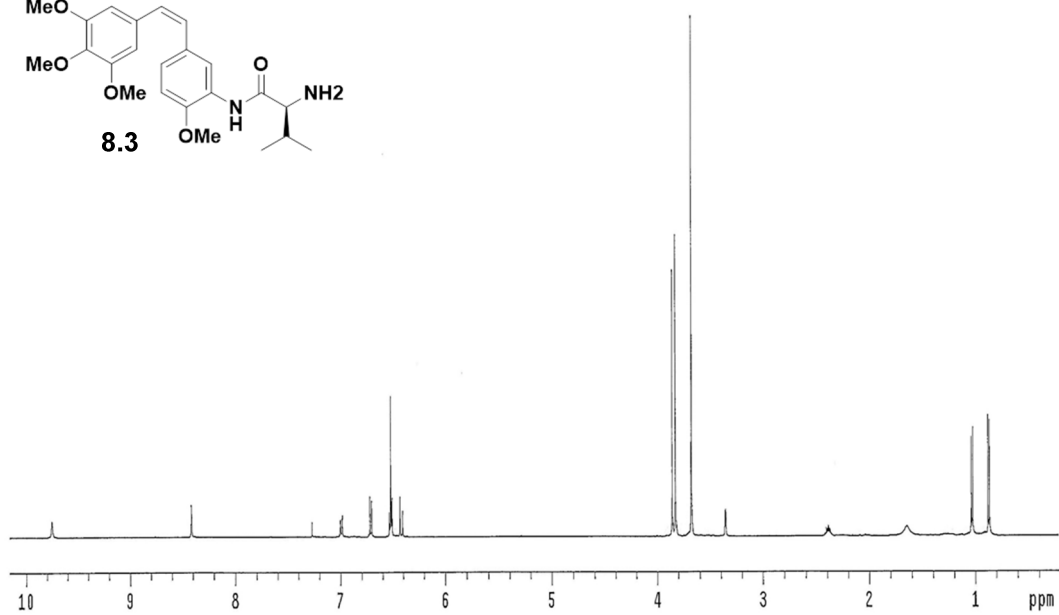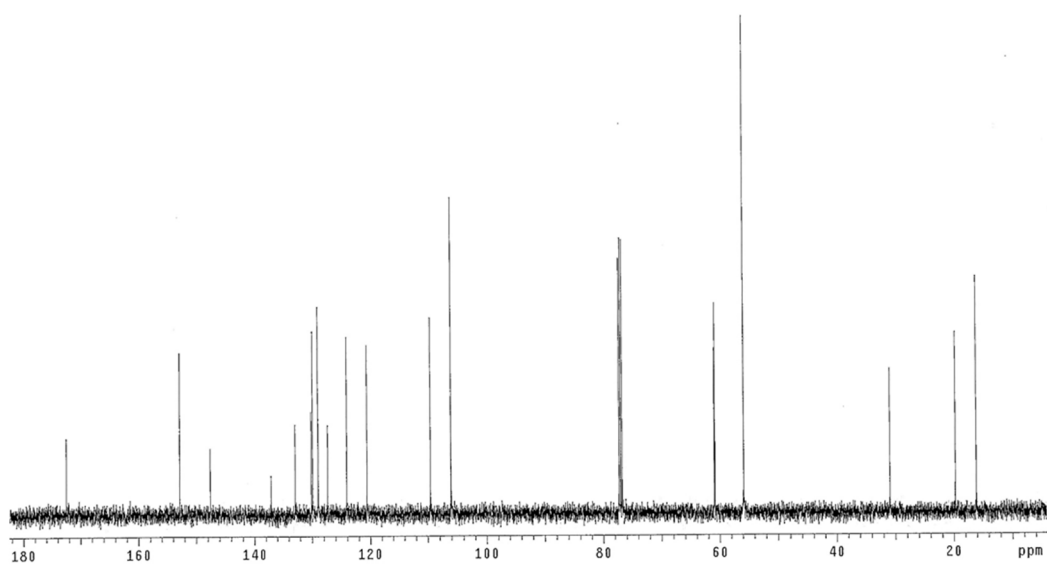

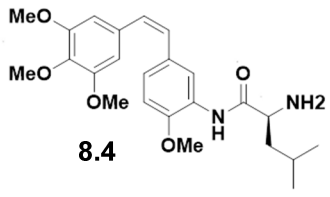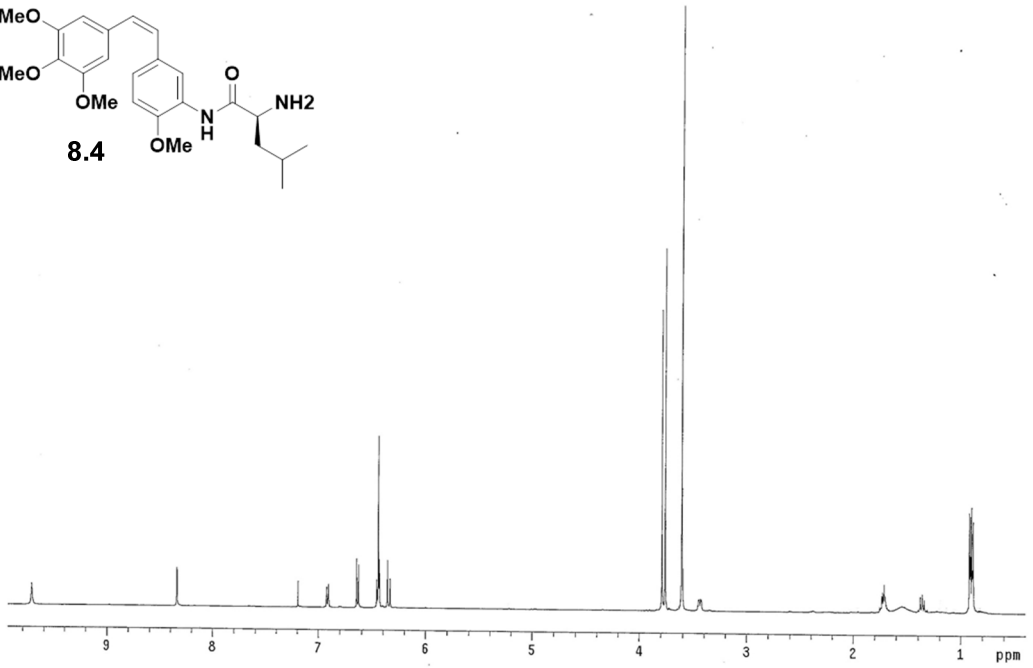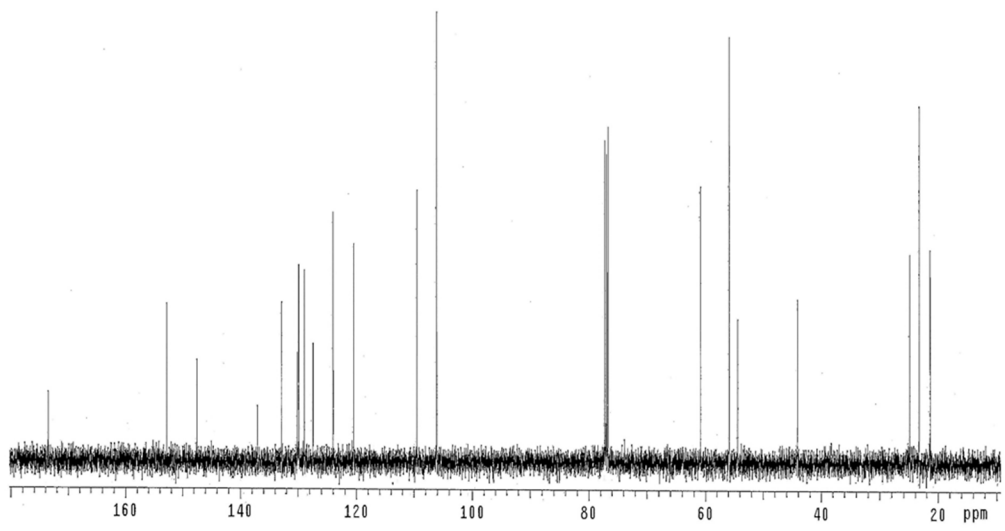

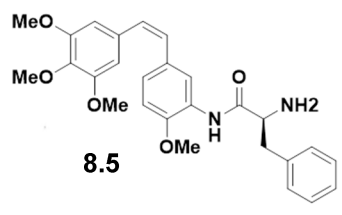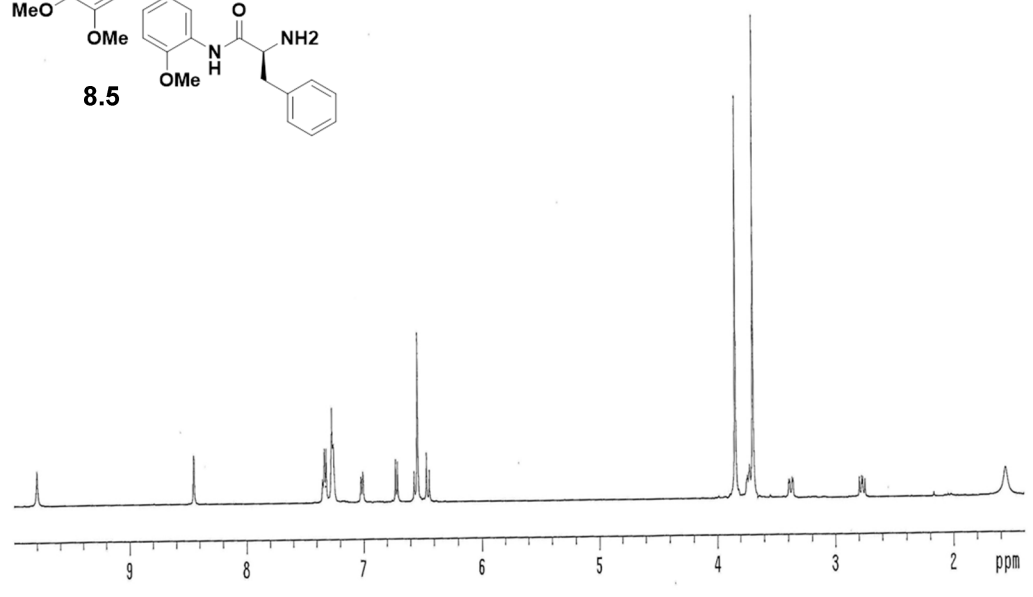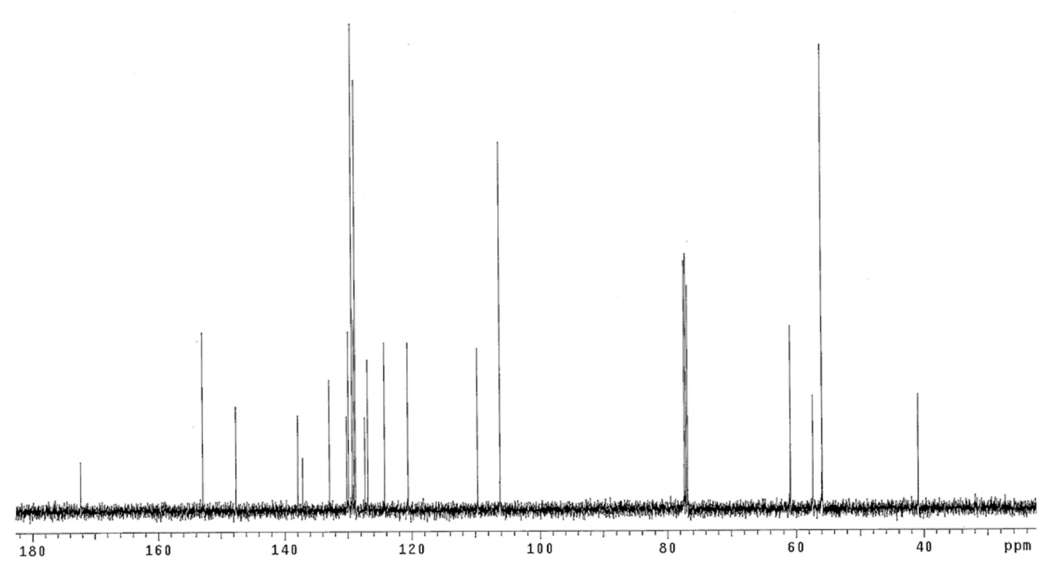

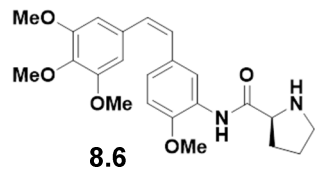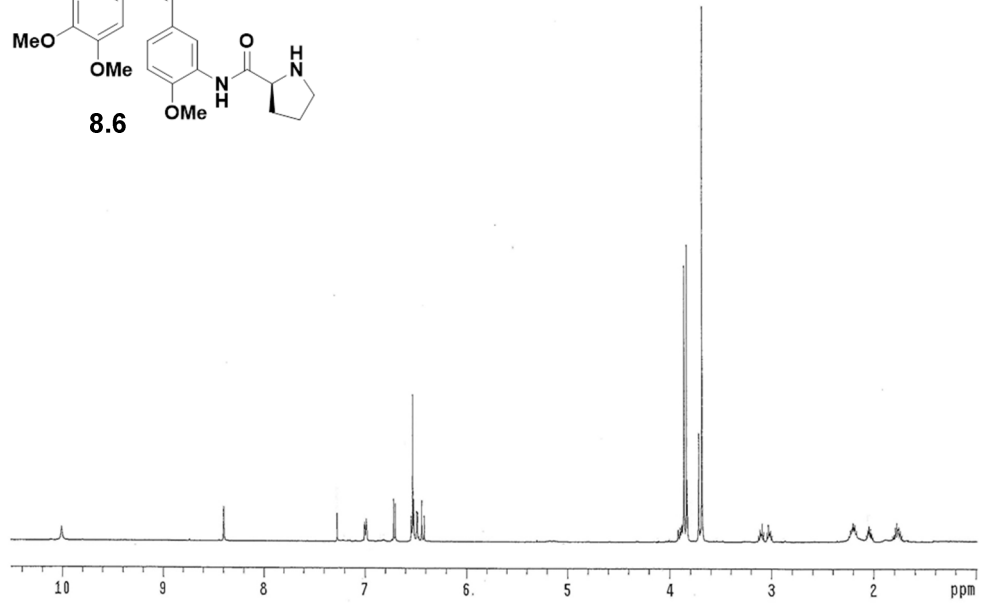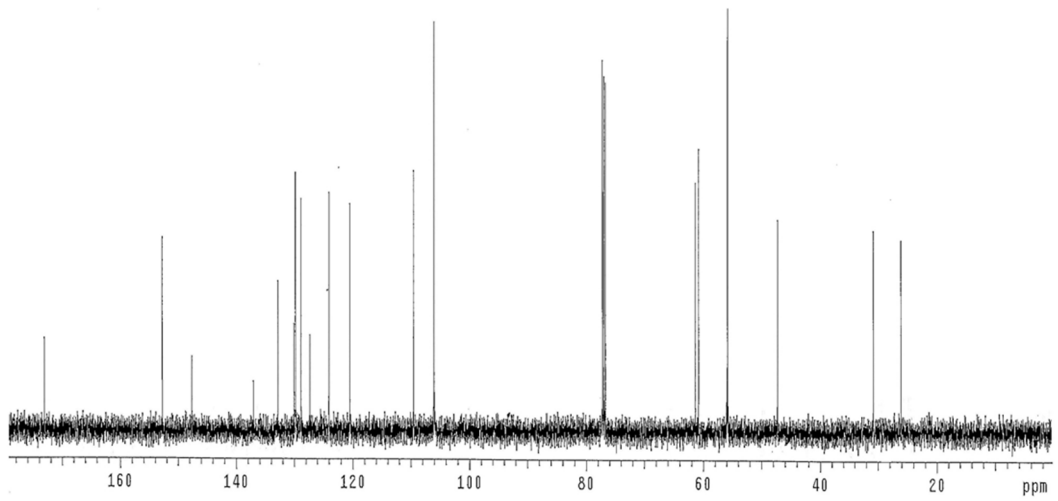

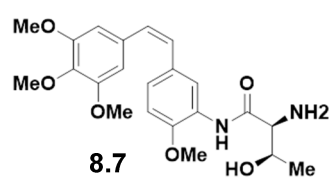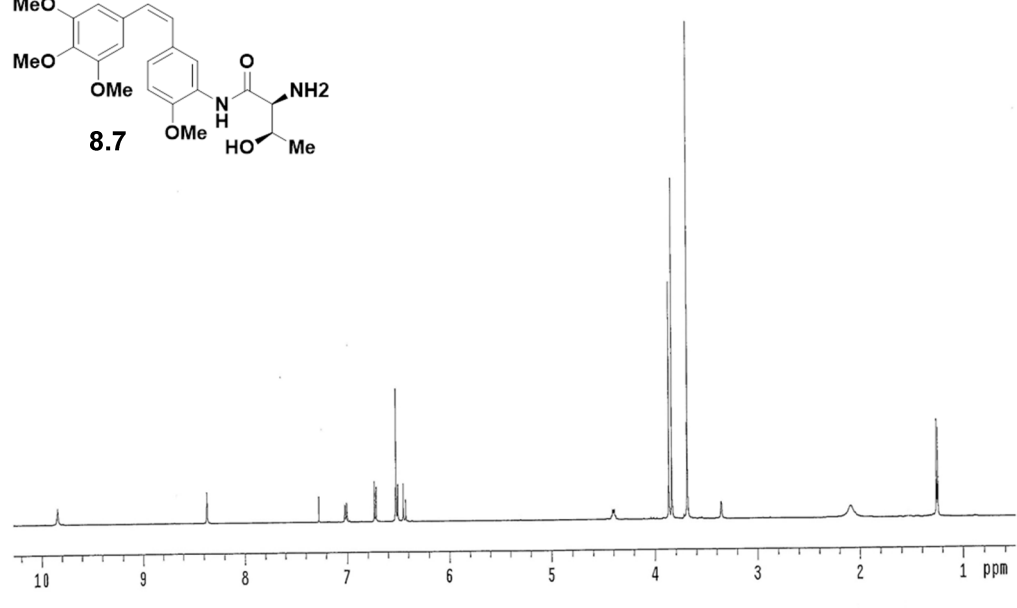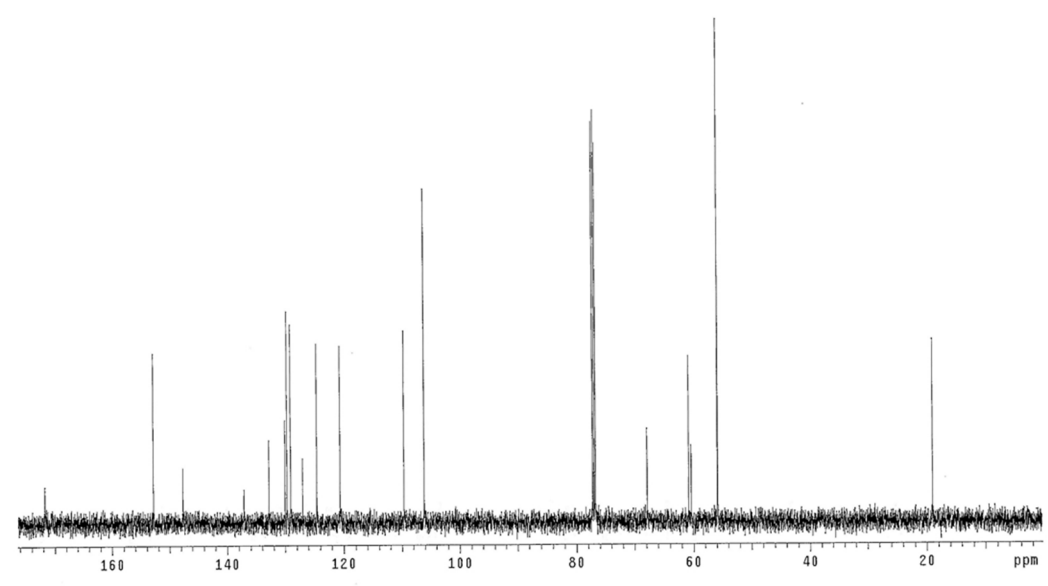

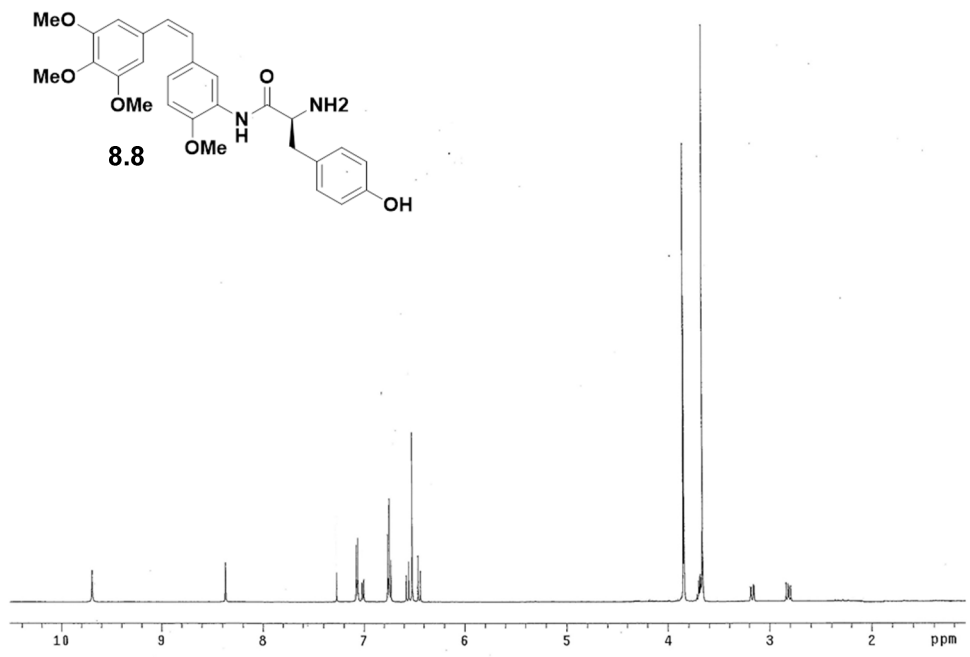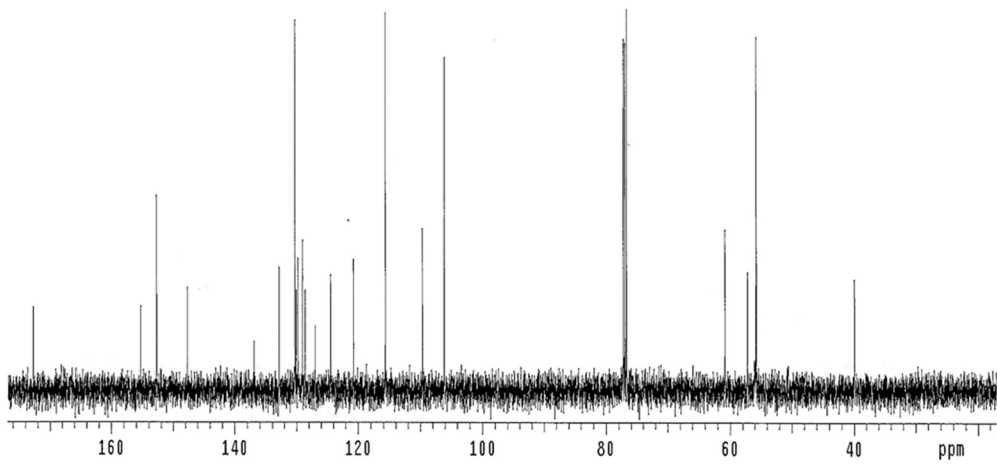

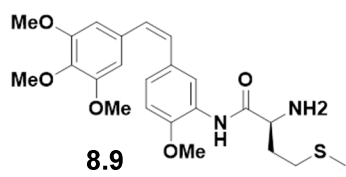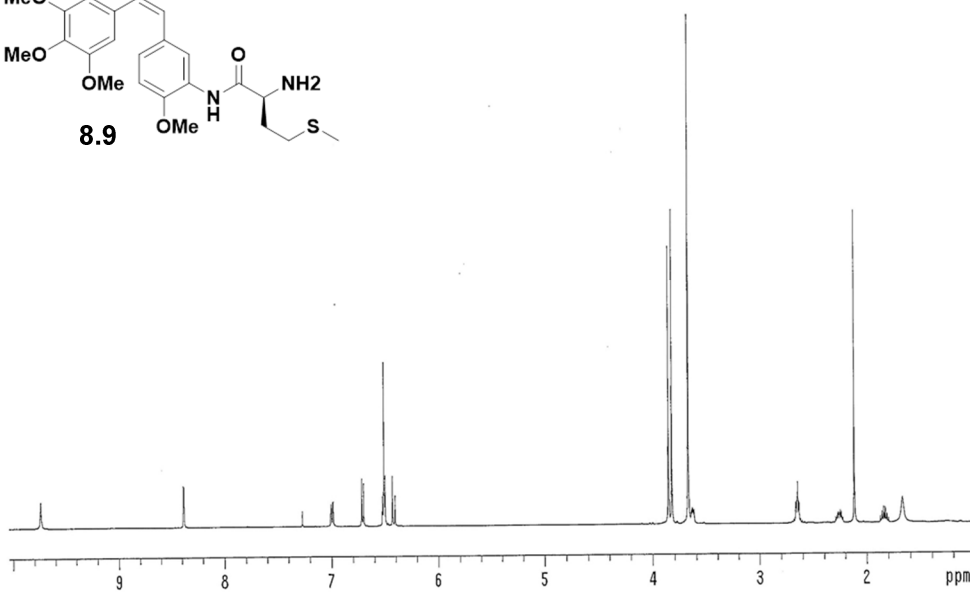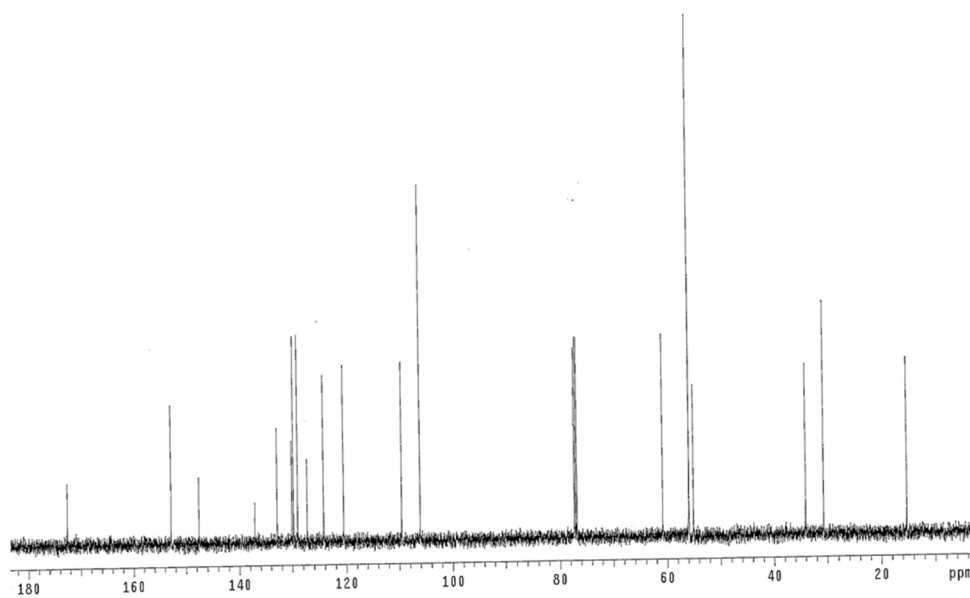

Supplement: molecules-25-00660-s001.pdf [file molecules-25-00660-s001.pdf]
